# Supplementary material
Source: publisher figshare collection journal article supplement (https://acs.figshare.com/ndownloader/files/22138188)
Supplement: Supplementary file 1 [file 22138188]

## Sheet: A_Clinical_data
Patient_ID	Patient_AD	Gender	Age(year)	AFP (ng/ml)	Albumin (g/l)	Heptitis Virus Infection	HBV DNA copy or HCV RNA Load	Number of Tumors	Tumor size (the largest, cm)	Chronic liver disease	Portal vein thrombosis (CT)	Microscope thrombus (after surgery)	Metastasis	Histology	Surgery time (DD/MM/YY)	HBV_label
23	1936190	M	61	132.4	40.3	HBV	3.33×10^2	2	4×2.5cm	nodular cirrhosis	No	No	No	Moderately differentiated grade 2	43217	HBV_positive
17	1938100	M	48	132.4	40.3	HBV	3.33×10^2	2	4×2.5cm	nodular cirrhosis	No	No	No	Moderately differentiated grade 2	2018-04-27	HBV_positive
12	1934216	M	51	132.4	40.3	HBV	3.33×10^2	2	4×2.5cm	nodular cirrhosis	No	No	No	Moderately differentiated grade 2	2018-04-27	HBV_positive
24	1876965	M	50	132.4	40.3	HBV	3.33×10^2	2	4×2.5 cm	nodular cirrhosis	No	No	No	Moderately differentiated grade 2	2018-04-27	HBV_positive
16	1936212	M	49	132.4	40.3	HBV	3.33×10^2	2	4×2.5 cm	nodular cirrhosis	No	No	No	Moderately differentiated grade 2	2018-04-27	HBV_positive
53	1950421	M	53	2627.1	36.7	HBV	<100	1	11×6×4.5 cm	mild cirrhosis	Yes	5 place, M2,	common bile duct cancer	Moderately differentiated grade 2	2018-04-10	HBV_positive
30	1945608	M	68	2627.1	36.7	HBV	<100	1	11×6×4.5 cm	mild cirrhosis	Yes	5 place, M2,	common bile duct cancer	Moderately differentiated grade 2	2018-04-10	HBV_positive
18	1941351	M	49	2627.1	36.7	HBV	<100	1	11×6×4.5 cm	mild cirrhosis	Yes	5 place, M2,	common bile duct cancer	Moderately differentiated grade 2	2018-04-10	HBV_positive
54	1933268	M	54	2.5	38.9	HBV	3.69×10^2	2	3×3 cm	Moderate cirrhosis	No	No	No	Moderately differentiated grade 2	2018-05-07	HBV_positive
28	1943520	M	54	7.3	38.8	No	(-)	1	2.5×2×2 cm	Tender	No	No	No	Moderately differentiated grade 2	2018-04-10	HBV_negative
22	1368366	M	48	7.3	38.8	No	(-)	1	2.5×2×2 cm	Tender	No	No	No	Moderately differentiated grade 2	2018-04-10	HBV_negative
53	1941582	F	53	7.3	38.8	No	(-)	1	2.5×2×2 cm	Tender	No	No	No	Moderately differentiated grade 2	2018-04-10	HBV_negative
7	1930447	M	70	27.9	39.9	HBV	8.85×10^4	2	9.5×7 cm	mild cirrhosis	No	No	No	Poor differentiated grade 3	2018-05-31	HBV_positive
33	1949623	M	48	27.9	39.9	HBV	8.85×10^4	2	9.5×7 cm	mild cirrhosis	No	No	No	Poor differentiated grade 3	2018-05-31	HBV_positive
8	1933410	M	50	27.9	39.9	HBV	8.85×10^4	2	9.5×7 cm	mild cirrhosis	No	No	No	Poor differentiated grade 3	2018-05-31	HBV_positive
61	1934713	M	61	27.9	39.9	HBV	8.85×10^4	2	9.5×7 cm	mild cirrhosis	No	No	No	Poor differentiated grade 3	2018-05-31	HBV_positive
55	1943704	M	55	/	/	/	/	/	/	/	/	/	/	/	2018-04-08	/
80	1933938	M	80	/	/	/	/	/	/	/	/	/	/	/	2018-04-08	/
10	1933594	F	60	18.3	35.1	HBV	7.39×10^2	1	7×6×4.8 cm	mild cirrhosis	No	No	No	Moderately differentiated grade 3	2018-05-03	HBV_positive
45	1924482	F	45	/	/	/	/	/		/	/	/	/	/	2018-05-07	hepatolobectomy+intraoperative fast test+special medication+percutaneous microwave coagulation therapy
20	1936598	M	51	/	/	/	/	/		/	/	/	/	/	2018-05-07	hepatolobectomy+intraoperative fast test+special medication+percutaneous microwave coagulation therapy
19	1941006	F	55	/	/	/	/	/		/	/	/	/	/	2018-05-07	hepatolobectomy+intraoperative fast test+special medication+percutaneous microwave coagulation therapy
51	1936646	M	51	/	/	/	/	/		/	/	/	/	/	2018-04-27	exploratory laparotomy+right hemihepatectomy+cholecystectomy
27	8140826	F	55	/	/	/	/	/		/	/	/	/	/	2018-04-09	exploratory laparotomy+right hemihepatectomy+cholecystectomy+percutaneous microwave coagulation therapy for left hepatic tumors
14	1937803	M	61	9310.8	39.7	HBV	1.11×10^5	7	6×5 cm	mild cirrhosis	Yes	/	common bile duct cancer	Moderately differentiated grade 3	2018-04-18	HBV_positive

## Sheet: B_batches
Batch_ID
	Batch1	Batch2	Batch3	Batch4	Batch5
Sample1	1	24	47	70	93
Sample2	2	25	48	71	94
Sample3	3	26	49	72	95
Sample4	4	27	50	73	96
Sample5	5	28	51	74	97
Sample6	6	29	52	75	98
Sample7	7	30	53	76	99
Sample8	8	31	54	77	100
Sample9	9	32	55	78	101
Sample10	10	33	56	79	102
Sample11	11	34	57	80	103
Sample12	12	35	58	81	104
Sample13	13	36	59	82	105
Sample14	14	37	60	83	106
Sample15	15	38	61	84	107
Sample16	16	39	62	85	108
Sample17	17	40	63	86	109
Sample18	18	41	64	87	110
Sample19	19	42	65	88	111
Sample20	20	43	66	89	112
Sample21	21	44	67	90	113
Sample22	22	45	68	91	114
Sample23	23	46	69	92	115
Sample24	Pool	Pool	Pool	Pool	Pool

## Sheet: C_samples
Batch_ID	Sample_ID	Patient_AD	Sample_types	Biological_replicates	Technical_replicates	SWATH file names
1	1	1936190	N23	a	a	G20190622gaohh_PCT2G_SWATH_b1_1
1	2	1938100	N17	a	a	G20190622gaohh_PCT2G_SWATH_b1_2
1	3	1934216	T12	a	a	G20190622gaohh_PCT2G_SWATH_b1_3
1	4	1876965	T24	a	a	G20190622gaohh_PCT2G_SWATH_b1_4
1	5	1936212	N16	a	a	G20190622gaohh_PCT2G_SWATH_b1_5
1	6	1936212	N16	a	b	G20190622gaohh_PCT2G_SWATH_b1_5_repA
1	7	1950421	T32	a	a	G20190622gaohh_PCT2G_SWATH_b1_6
1	8	1945608	N30	a	a	G20190622gaohh_PCT2G_SWATH_b1_7
1	9	1941351	T18	a	a	G20190622gaohh_PCT2G_SWATH_b1_8
1	10	1936212	T16	a	a	G20190622gaohh_PCT2G_SWATH_b1_9
1	11	1934216	N12	a	a	G20190622gaohh_PCT2G_SWATH_b1_10
1	12	1934216	N12	a	b	G20190622gaohh_PCT2G_SWATH_b1_10_repA
1	13	1933268	N5	a	a	G20190622gaohh_PCT2G_SWATH_b1_11
1	14	1933268	N5	a	b	G20190622gaohh_PCT2G_SWATH_b1_12
1	15	1943520	T28	a	a	G20190622gaohh_PCT2G_SWATH_b1_13
1	16	1368366	N22	a	a	G20190622gaohh_PCT2G_SWATH_b1_14
1	17	1941582	T21	a	a	G20190622gaohh_PCT2G_SWATH_b1_15
1	18	1941582	T21	a	b	G20190622gaohh_PCT2G_SWATH_b1_15_repA
1	19	1945608	N30	b	a	G20190622gaohh_PCT2G_SWATH_b1_16
1	20	1930447	N7	a	a	G20190622gaohh_PCT2G_SWATH_b1_17
1	21	1949623	T33	a	a	G20190622gaohh_PCT2G_SWATH_b1_18
1	22	1933410	T8	a	a	G20190622gaohh_PCT2G_SWATH_b1_19
1	23	1934713	N13	a	a	G20190622gaohh_PCT2G_SWATH_b1_20
2	24	1950421	N32	a	a	G20190622gaohh_PCT2G_SWATH_b2_21
2	25	1943704	T31	a	a	G20190622gaohh_PCT2G_SWATH_b2_22
2	26	1930447	T7	a	a	G20190622gaohh_PCT2G_SWATH_b2_23
2	27	1933938	N9	a	a	G20190622gaohh_PCT2G_SWATH_b2_24
2	28	1933938	T9	a	a	G20190622gaohh_PCT2G_SWATH_b2_25
2	29	1933938	T9	a	b	G20190622gaohh_PCT2G_SWATH_b2_25_repA
2	30	1933594	N10	a	a	G20190622gaohh_PCT2G_SWATH_b2_26
2	31	1949623	N33	a	a	G20190622gaohh_PCT2G_SWATH_b2_27
2	32	1943520	N28	a	a	G20190622gaohh_PCT2G_SWATH_b2_28
2	33	1933594	T10	a	a	G20190622gaohh_PCT2G_SWATH_b2_29
2	34	1936190	T23	a	a	G20190622gaohh_PCT2G_SWATH_b2_30
2	35	1936190	T23	a	b	G20190622gaohh_PCT2G_SWATH_b2_30_repA
2	36	1368366	N22	b	a	G20190622gaohh_PCT2G_SWATH_b2_31
2	37	1934713	N13	b	a	G20190622gaohh_PCT2G_SWATH_b2_32
2	38	1941351	T18	b	a	G20190622gaohh_PCT2G_SWATH_b2_33
2	39	1938100	T17	a	a	G20190622gaohh_PCT2G_SWATH_b2_34
2	40	1936190	N23	b	a	G20190622gaohh_PCT2G_SWATH_b2_35
2	41	1936190	N23	a	b	G20190622gaohh_PCT2G_SWATH_b2_35_repA
2	42	1933938	T9	b	a	G20190622gaohh_PCT2G_SWATH_b2_36
2	43	8140826	T27	a	a	G20190622gaohh_PCT2G_SWATH_b2_37
2	44	1941351	N18	a	a	G20190622gaohh_PCT2G_SWATH_b2_38
2	45	1924482	T6	a	a	G20190622gaohh_PCT2G_SWATH_b2_39
2	46	1937803	T14	a	a	G20190622gaohh_PCT2G_SWATH_b2_40
3	47	1936598	N20	a	a	G20190622gaohh_PCT2G_SWATH_b3_41
3	48	1934713	T13	a	a	G20190622gaohh_PCT2G_SWATH_b3_42
3	49	1368366	T22	a	a	G20190622gaohh_PCT2G_SWATH_b3_43
3	50	1941006	N19	a	a	G20190622gaohh_PCT2G_SWATH_b3_44
3	51	1941582	T21	b	a	G20190622gaohh_PCT2G_SWATH_b3_45
3	52	1941582	T21	b	b	G20190622gaohh_PCT2G_SWATH_b3_45_repA
3	53	1936646	N15	a	a	G20190622gaohh_PCT2G_SWATH_b3_46
3	54	1934713	T13	b	a	G20190622gaohh_PCT2G_SWATH_b3_47
3	55	1941351	N18	b	a	G20190622gaohh_PCT2G_SWATH_b3_48
3	56	1876965	N24	a	a	G20190622gaohh_PCT2G_SWATH_b3_49
3	57	1933594	N10	b	a	G20190622gaohh_PCT2G_SWATH_b3_50
3	58	1933594	N10	b	b	G20190622gaohh_PCT2G_SWATH_b3_50_repA
3	59	1937803	N14	a	a	G20190622gaohh_PCT2G_SWATH_b3_51
3	60	1943520	N28	b	a	G20190622gaohh_PCT2G_SWATH_b3_52
3	61	1936212	N16	b	a	G20190622gaohh_PCT2G_SWATH_b3_53
3	62	8140826	N27	a	a	G20190622gaohh_PCT2G_SWATH_b3_54
3	63	1924482	N6	a	a	G20190622gaohh_PCT2G_SWATH_b3_55
3	64	1924482	N6	a	b	G20190622gaohh_PCT2G_SWATH_b3_55_repA
3	65	1876965	N24	b	a	G20190622gaohh_PCT2G_SWATH_b3_56
3	66	1933410	N8	a	a	G20190622gaohh_PCT2G_SWATH_b3_57
3	67	1937803	N14	b	a	G20190622gaohh_PCT2G_SWATH_b3_58
3	68	1938100	N17	b	a	G20190622gaohh_PCT2G_SWATH_b3_59
3	69	1938100	T17	b	a	G20190622gaohh_PCT2G_SWATH_b3_60
4	70	1936646	T15	a	a	G20190622gaohh_PCT2G_SWATH_b4_61
4	71	1936598	T20	a	a	G20190622gaohh_PCT2G_SWATH_b4_62
4	72	1945608	T30	a	b	G20190622gaohh_PCT2G_SWATH_b4_63
4	73	1933594	T10	b	a	G20190622gaohh_PCT2G_SWATH_b4_64
4	74	1924482	T6	b	a	G20190622gaohh_PCT2G_SWATH_b4_65
4	75	1924482	T6	b	b	G20190622gaohh_PCT2G_SWATH_b4_65_repA
4	76	1936598	N20	b	a	G20190622gaohh_PCT2G_SWATH_b4_66
4	77	1949623	N33	b	a	G20190622gaohh_PCT2G_SWATH_b4_67
4	78	1950421	T32	b	a	G20190622gaohh_PCT2G_SWATH_b4_68
4	79	1933268	T5	a	a	G20190622gaohh_PCT2G_SWATH_b4_69
4	80	1930447	T7	b	a	G20190622gaohh_PCT2G_SWATH_b4_70
4	81	1930447	T7	b	b	G20190622gaohh_PCT2G_SWATH_b4_70_repA
4	82	1934216	T12	b	a	G20190622gaohh_PCT2G_SWATH_b4_71
4	83	1937803	T14	b	a	G20190622gaohh_PCT2G_SWATH_b4_72
4	84	1943520	T28	b	a	G20190622gaohh_PCT2G_SWATH_b4_73
4	85	1930447	N7	b	a	G20190622gaohh_PCT2G_SWATH_b4_74
4	86	1936646	T15	b	a	G20190622gaohh_PCT2G_SWATH_b4_75
4	87	1936646	T15	b	b	G20190622gaohh_PCT2G_SWATH_b4_75_repA
4	88	1949623	T33	b	a	G20190622gaohh_PCT2G_SWATH_b4_76
4	89	1934216	N12	b	a	G20190622gaohh_PCT2G_SWATH_b4_77
4	90	1950421	N32	b	a	G20190622gaohh_PCT2G_SWATH_b4_78
4	91	1941006	T19	a	a	G20190622gaohh_PCT2G_SWATH_b4_79
5	92	1941582	N21	a	a	G20190622gaohh_PCT2G_SWATH_b4_80
5	93	8140826	N27	b	a	G20190622gaohh_PCT2G_SWATH_b5_81
5	94	1941006	N19	b	a	G20190622gaohh_PCT2G_SWATH_b5_82
5	95	1936646	N15	b	a	G20190622gaohh_PCT2G_SWATH_b5_83
5	96	1941006	T19	b	a	G20190622gaohh_PCT2G_SWATH_b5_84
5	97	1941006	T19	b	b	G20190622gaohh_PCT2G_SWATH_b5_84_repA
5	98	1943704	T31	b	a	G20190622gaohh_PCT2G_SWATH_b5_85
5	99	1368366	T22	b	a	G20190622gaohh_PCT2G_SWATH_b5_86
5	100	1936190	T23	b	a	G20190622gaohh_PCT2G_SWATH_b5_87
5	101	1943704	N31	a	a	G20190622gaohh_PCT2G_SWATH_b5_88
5	102	1933410	N8	b	a	G20190622gaohh_PCT2G_SWATH_b5_89
5	103	1933938	N9	b	a	G20190622gaohh_PCT2G_SWATH_b5_90
5	104	1933938	N9	b	b	G20190622gaohh_PCT2G_SWATH_b5_90_repA
5	105	1936212	T16	b	a	G20190622gaohh_PCT2G_SWATH_b5_91
5	106	1936598	T20	b	a	G20190622gaohh_PCT2G_SWATH_b5_92
5	107	1933268	T5	b	a	G20190622gaohh_PCT2G_SWATH_b5_93
5	108	1941582	N21	b	a	G20190622gaohh_PCT2G_SWATH_b5_94
5	109	8140826	T27	b	a	G20190622gaohh_PCT2G_SWATH_b5_95
5	110	1943704	N31	b	a	G20190622gaohh_PCT2G_SWATH_b5_96
5	111	1876965	T24	b	a	G20190622gaohh_PCT2G_SWATH_b5_97
5	112	1933410	T8	b	a	G20190622gaohh_PCT2G_SWATH_b5_98
5	113	1924482	N6	b	a	G20190622gaohh_PCT2G_SWATH_b5_99
5	114	1945608	T30	b	a	G20190622gaohh_PCT2G_SWATH_b5_100
5	115	1945608	T30	b	b	G20190622gaohh_PCT2G_SWATH_b5_100_repA

## Sheet: D_Prot_matrix_of 25pairs_HCC 
Proteins	G20190622gaohh_PCT2G_SWATH_b3_55_repA	G20190622gaohh_PCT2G_SWATH_b3_57	G20190622gaohh_PCT2G_SWATH_b4_69	G20190622gaohh_PCT2G_SWATH_b4_63	G20190622gaohh_PCT2G_SWATH_b5_93	G20190622gaohh_PCT2G_SWATH_b2_25_repA	G20190622gaohh_PCT2G_SWATH_b5_85	G20190622gaohh_PCT2G_SWATH_b1_18	G20190622gaohh_PCT2G_SWATH_b3_45	G20190622gaohh_PCT2G_SWATH_b2_35	G20190622gaohh_PCT2G_SWATH_b2_36	G20190622gaohh_PCT2G_SWATH_b4_67	G20190622gaohh_PCT2G_SWATH_b1_16	G20190622gaohh_PCT2G_SWATH_b1_1	G20190622gaohh_PCT2G_SWATH_b4_70_repA	G20190622gaohh_PCT2G_SWATH_b2_32	G20190622gaohh_PCT2G_SWATH_b5_84_repA	G20190622gaohh_PCT2G_SWATH_b3_47	G20190622gaohh_PCT2G_SWATH_b5_83	G20190622gaohh_PCT2G_SWATH_b4_64	G20190622gaohh_PCT2G_SWATH_b4_78	G20190622gaohh_PCT2G_SWATH_b2_35_repA	G20190622gaohh_PCT2G_SWATH_b3_59	G20190622gaohh_PCT2G_SWATH_b5_87	G20190622gaohh_PCT2G_SWATH_b5_82	G20190622gaohh_PCT2G_SWATH_b3_48	G20190622gaohh_PCT2G_SWATH_b1_13	G20190622gaohh_PCT2G_SWATH_b2_21	G20190622gaohh_PCT2G_SWATH_b4_75_repA	G20190622gaohh_PCT2G_SWATH_b5_99	G20190622gaohh_PCT2G_SWATH_b2_30	G20190622gaohh_PCT2G_SWATH_b4_61	G20190622gaohh_PCT2G_SWATH_b4_65_repA	G20190622gaohh_PCT2G_SWATH_b1_5_repA	G20190622gaohh_PCT2G_SWATH_b5_81	G20190622gaohh_PCT2G_SWATH_b1_19	G20190622gaohh_PCT2G_SWATH_b5_88	G20190622gaohh_PCT2G_SWATH_b4_68	G20190622gaohh_PCT2G_SWATH_b3_60	G20190622gaohh_PCT2G_SWATH_b1_9	G20190622gaohh_PCT2G_SWATH_b2_30_repA	G20190622gaohh_PCT2G_SWATH_b1_5	G20190622gaohh_PCT2G_SWATH_b1_8	G20190622gaohh_PCT2G_SWATH_b5_94	G20190622gaohh_PCT2G_SWATH_b2_33	G20190622gaohh_PCT2G_SWATH_b5_95	G20190622gaohh_PCT2G_SWATH_b1_2	G20190622gaohh_PCT2G_SWATH_b5_89	G20190622gaohh_PCT2G_SWATH_b5_96
1/A0AV96				15.67	15.14													15.07									14.9					14.85														14.74
1/A0AVT1					15.43				15.82		15.13					15.16											15.35					15.74							15.7
1/A0FGR8					16.83		16.26	16.19	15.81							15.77		15.41						15.9							15.57	15.65		15.58		16.22					15.45					17.74		16.05
1/A0MZ66							17.29					15.91	15.68	16.21	15.6	16.37	17.1		15.88		16.89		16.04			15.82			16.05		17.28		16.2					18.36			17.18		16.05	15.93					15.55
1/A0PJK1
1/A1A4S6					19.62				19.46		17.84				19.46			18.48		19.25	17.2			18.03							17.95		18.38			19.13			18.35		17.88
1/A1A5D9																		21.87
1/A1L0T0	15.56	15.27				14.57		15.43		15.5	15.36	15.64	15.05	15.49	14.24	15.52	15.39		15.13	15.31		15.36	15.79	14.8	15.25		15.07	15.6	15.06		15.02			14.96	15.32		15.12		14.17			15.12	15.29	15.4	14.83	15.48	15.41	15.48	15.63
1/A1L390				16.17						16.06			16.52	16.14								16.04				16.24											16.43						16.39				16.06		16.22
1/A1X283						15.2					15.58							15.25			15.21										14.88														15.54
1/A2A288					17.33	16.28	16.53	16.69					15.66		17.25	15.89		17.06	15.53	17.1	16.49			16.97	15.71		17.15		16.3	16.13		16.34	16.95	16.19	15.67	17.33	15.97			16.17	16.31	15.98		15.86	16.56	17.5
1/A2RRP1		13.81	13.72	13.9		13.54	12.86		13.71		13.27				12.66				13.4	13.96			14.05	13.84			13.98			13.51	13.53				13.59		13.71		13.37	13.61	13.49			13.37	13.7	14.06		13.97	13.74
1/A2RUS2
1/A2VDF0	15.65	15.69						14.96	15.07	15.72		14.83	16.07	16.04		15.01	15.81		15.83	15.36		15.81	15.98	14.13			15.45	16.43	15.86		13.61			16.44	16.28		15.29					16.35	15.92	16.24	14.26		15.6	15.8	15.67
1/A3KMH1	16.17	15.41		16.34		15.46		14.91	14.28	15.7	15.28	14.58	15.64	16.03		16.03	15.14	14.27	15.38	14.81		15.74	15.36	16.43	15.07	15.78	16.55	15.9	15.14	16	14.36	14.02	14.31	14.63	15.55	15.37	15.67	14.45	14.36	15.13	14.5	14.71	16.02	15.51	14.25	15.28	15.58	15.69	16.37
1/A3KN83							17.43						17.37							16.62																	16.32									17.08			15.32
1/A4D1E9											12.41
1/A4D1P6		16.25			15.95	16.9	17.01				15.77				16.09		16.96	14.87			16.56					16.16					17					15.86		17.5			17.05		16.9	16.87
1/A4D1S5						19.39					17.83				18.05		16.76				19.72												18.9						18.85	18.55	18.15				19.19
1/A5A3E0	19.67	19.88	20.18	19.87	20.27	21.03	21.19	20.91	21.72	19.72	20.99	18.99	19.34	19.49	20.33	19.49	20.7	21.56	19.36	21.41	20.7	19.66	19.42	21.3	19.34	19.05	20.83	19.53	20.3	19.94	21.2	21.43	21.74		19.3	21.48	20.07	21.21	21.69	20.56	21.24	20.65		19.51	20.86	20.4	19.15	20.53	19.4
1/A5D8V6
1/A5PLN9															16.29									16.25										14.52
1/A5YKK6	16.11									16.48		16.67											16.47																								16.45	16.67
1/A6NC98	16.66	16.99								17.57	17.71	17.87	17.53	17.45					17.52			17.21	17.23			17.75		17.49	17.05	17.1	16.87						17.5	16.96	16.99			18.1					17.06	16.81	16.98
1/A6NCS6																													15.53
1/A6ND36																					17.39				18.05														17.33			16.69							17.32
1/A6ND91		15.9								15.9		16.35	15.85	16.48		15.74	16.28		16.35			15.97	16.6		14.97	16.82	14.88	16.57	15.65	16.01				15.93	16.08		15.77			15.95		15.89	16.73	16.41			16.22		16.16
1/A6NDB9	14.98							14.65		14.67				15.04	14.68	15.15			15.19	15.31		14.93		15.38	15.2				15.07	15.36					15.49				14.6								14.72
1/A6NDG6			15.38	15.3	15.69																																								15.82
1/A6NDU8			16.54	16.44	16.02	15.73		16.58												17.23				15.88			15.78		15.95				15.33	16.05			15.68			15.97	15.66	15.95		14.94					15.55
1/A6NED2																															15.69
1/A6NGC4																																													16.91
1/A6NHL2	16.14		15.98	16.37	16.12				16.06	15.4	15.93		15.38		15.51	15.76		15.09		16.17			15.69			15.27			15.02		15.85								15.37				15.63	15.73	15.52	16.81			16.14
1/A6NHR9									14.54											14.41																									14.1	14.43
1/A6NIH7																					17.57
1/A6NKD9
1/A6NL28			14.55		16	15.13	14.99	15.68					15.35	15.2	15.33	15.34	15.7	15.13	15.1	16.62	15.75		14.79	16.48	14.87		16.12		15.49	15.31	14.49	15.87	16.19	15.78	15.13	15.78	15.84			15.31	15.61	15.45	14.91	15.14	16.27	16.41
1/A6NMZ7																			15.05		15.83										16.05		17.08					16.21	17.04	15.86	16.18
1/A7E2V4
1/A7KAX9	14.45																	15.51																	15.06
1/A7MCY6
1/A8K7I4				17.47					16.04
1/A8MXV4				14.5	14.62						14.29																					14.21														14.28
1/A9UHW6
1/B0I1T2				15.97					16.42												15.03										14.62		14.88					14.56	15.35	14.21	14.39				14.6
1/B1AK53						18.12					17.9	16.86			15.93		17.48	17.66			18.63										19.18	17.79		17.38			16.67	15.58	18.24	16.66		17.58			18.4
1/B2RTY4								14.48									14.23
1/B2RXH4		18.46				18.32	20.01			18.26	20.7		17.7		20.42		17.53	17.72	16.87	19.35		17.94							18.82	17.87	20.22	18.1	17.94		17.34		17.87	20.4	18.05		20.28	16.9		17.23	19.62	20.08
1/B7ZAP0
1/B9A064		16.42			17.13	18.08	16.81	15.97			18.67	16.47	16.46	16.19	16.72	16.08		16.55	15.91	16.19	17.68	16.68	16.28	17.02	16.94		16.93	15.71	16.63	16.6	17.46	17.82	18.07	17.58	15.68	16.22		16.83		17.66	17.42	17.61	15.72	15.94			15.87
1/C9JI98																																												14.98
1/C9JLW8
1/K7EJ46											14.4
1/O00115			16.02	15.72	16.26					16.1			15.76		16.89			15.72				15.74	15.85			15.54	15.36		15.81	15.92				15.68			15.74			15.6			15.97			16.8	14.91		15.34
1/O00116		14.62				14.8	15.23	15.54			15.44	14.85			15.44			14.74		15.25		14.37	14.81	15.6			14.97			14.48			14.81			15.73				14.81		14.82			15.3	15.57		14.89
1/O00139																		15.72														15.24				16.22
1/O00142							15.84				15.62			15.6											14.67	15.12	15.62		15.5					15.25	15.23		15.51			15.26							15.08	15.72	15.53
1/O00148			15.04	15.6	15.23	14.34	14.11	14.86	14.63		14.55				14.69			14.62		16.01							14.91				14.66	14.61	15.08			14.41			14.89							14.86
1/O00151	16.73	16.8	16.45	15.77	16.79	16.98	15.23	16.77	18.03	16.73	17.3	16.17	16.51	16.33	16.89	16.44	17	17.89	16.65	18.67	17.11	17	16.64	16.65	16.12	16.51	18.27	16.61	17.81	16.73	17.77	17.09	17.1	16.9	16.58	18.91	17.22	17.87	17.1	16.85	17.68	16.88	17.2	16.77	17.46	17.82	16.29	17.11	16.61
1/O00154			14.34	15.35	15.59	14.22		14.41	14.73		14.49									14.91				14.4			14.77					15	14.97			14.4			14.66		13.96				15.22	14.73		14.55
1/O00159	16.45	16.34		16.09	15.63	16.05	15.59	16.59	15.6	16.11	15.86		16.04	16.32	17.28	16.39	16.79	15.55	16.04	16.22	16.9	16.17	16.32	16.93	15.99	15.63	16.07	16.21	15.93	16.27	17.08	16.42	16.26	16.16	15.62	16.35	16.02	16.22	16.63	16.31	17.16	16.15	16.11	16.12	15.98	16.18	16.28	16.8	16.74
1/O00160		18.03			17.8					17.83				17.51						17.3	17.08		18.25							17.92	18.28		17.15					17.38	17.66	15.9	17.86	16.52		18.7	17.84				17.69
1/O00161			15.49	15.16		15.31		15.67	16.26	17.8	15.16							15.5		15.72	15.04				16.42		15.57						15.03			15.61			15.22	14.7					15.21	15.51		15.52
1/O00165			15.74																				14.57																										14.78
1/O00170			13.83	14.18	14.76				14.56																								14.13						14.21							14.57
1/O00178				14.49			15.1	14.67	14.6		14.68				15.01					14.77	14.21			14.88			14.75				14.72		14.46			14.4	14.13			14.08	14.45			14.42	14.87	14.77		14.17	14.29
1/O00182											14.61				14.49																		13.89						13.83
1/O00186	14.02	14.43	15.18	14.62	15.08	14.51	14.54	14.59	14.45	14.15	14.81			14.38		14.81		14.79		14.74			14.28	14.72			14.41	14.32	13.99		14.32		14.26	14		14.55		13.76	14.14		14.27		14.24		14.31	15.06	14.42	14.5
1/O00192					15
1/O00193
1/O00194							16.51											15.56
1/O00203	15.3					14.81	15.06				15.19		15.04	15.09	15.42	15.17	14.87			15.57		15.21		15.77		14.9		15.36	14.67	15.05		15.44	15.17			15.25	14.77						15.24	15.02	15.25	15.9	14.95	15.54	15.3
1/O00214			15.75																	15.81				15.71					15.29		14.9
1/O00217	15.44					16.04					16.07	16.61			15.81	17.11		14.86				15.59	15.87		16.11		16.5			15.62	15.6						15.29						15.62			16.52	15.79	16.04
1/O00221																																										17.36
1/O00231	14.94	15.51	15.14	15.94	16	15.49	15.78	15.63	15.64	15.38	15.53	14.78	15.34	15.08	15.22	15.1	15.39	15.97	14.76	15.65	15.21	15.25	15.27	15.8	15	14.94	15.83	15.55	15.34	14.96	15.46	14.93	15.78	15.91	15.2	16.11	15.1	14.92	15.83	15.65	15.48	15.6	15.21	15.43	15.51	16.11	15.21	15.81	15.3
1/O00232	15.43	15.85	14.97	15.96	15.87	16.17	16.01	15.72	16.04	15.52	15.99	15.51	15.02	15.3	15.87	15.28	15.59	15.78	15.22	15.9	15.17	15.68	15.7	15.66	15.14	15.55	15.89	15.76	15.73	15.46	15.9	15.54	15.64	15.58	15.36	15.98	15.27	15.45	15.99	15.76	15.61	15.52	15.46	15.71	15.71	16.32	15.39	15.87	15.48
1/O00233		15.34	16.42	16.22	16.55	15.37		15.36	15.33					15.17	15.68		15.47	15.75		15.99	15.81	15.27	15.2				15.27		15.43	15.22	15.31		15.65		15.1	15.47	14.84	16.11	15.75	15.69	15.36	14.65	15.41		15.7	16.07	15.17		15.06
1/O00238																			15.43
1/O00244		16.16		16.46	16.79			16.29	16.03											17.07		16.42					18.16		16.6						16.14	17.32								16.33		16.13		16.27
1/O00255
1/O00257																																	17.21
1/O00264	20.19	19.2	22.1	19.95	21.74	16.98	16.79	18.83	17.6	19.81	17.19	18.35	19.08	19.47	17.12	19.51	18.38	17.45	18.95	17.59	16.12	20	18.96	18.52	18.53	18.89	20.21	18.77	20	19.57	16.83	16.93	15.88	18.35	19.01	18.77	18.61	16.78	15.86	18.57	16.8	18.2	19.19	18.89	17.31	18.09	19.06	19.31	19.14
1/O00267			15.98																		15.28																									16.6
1/O00268										14.73			15.42	15.25									15.22			14.96				15.07													15.44					14.89
1/O00273																16.28		17.42			15.62																16.45
1/O00291					15.87	14.56					15.52					14.9		15.18		15.39							15.8		15.33	14.99	15.86						14.84		16.36		15.79			14.95		15.46
1/O00299	15.15	15.9	16.2	16.92	16.89	17.6	19.14	16.04	18.27	15.67	18.76	15.19	15.43	15.22	17.27	15.72	15.71	16.63	15.29	16.82	15.63	15.83	15.32	15.86	15.69	15.22	16.32	15.52	16.02	15.76	16.63	17.39	17.16	16.08	15.43	17.35	15.75	16.95	17.31	15.81	16.72	16.08	15.32	15.56	17.75	15.99	15	15.91	15.05
1/O00303	15.41	15.7	16.24	15.95	16.49	15.58	16.1	15.95	16.09	15.76	16.02	15.23	15.29	15.66	16.32	15.71	15.57	15.93	15.73	16.35	15.33	15.87	15.32	15.68	15.19	15.16	15.93	15.34	15.99	15.76	15.74	15.49	16.23	15.37	15.05	16.1	15.69	15.26	16.31	15.85	15.67	15.46	15.6	15.56	16.07	16.33	15.66	15.57	15.77
1/O00305																																										14.64
1/O00308		15.59												15.29					15.33				15.71					15.51															15.25	15.83			15.05		15.24
1/O00329													16.54	16.65		16.47	15.87						16.35									14.92												15.78			16.54
1/O00330	14.03		14.22	14.34		14.47		14.86	14.64	14.11	14.59		14.56	14.65	14.36	14.68						14.29		14.34	13.99		14.67	14.43	14.2	14.01				13.97	14.77	14.22	14.35		14.29	14.31			14.68					14.48
1/O00338					14.62		15.14																																							14.63
1/O00339									15.23											15.1
1/O00391						16.88	17.16				17.25				16.2						15.31												15.47			15.91									16.3
1/O00400	16.41
1/O00401											16.44									16.66							15.99									16.26											15.99
1/O00408																												15.2
1/O00410	14.65	14.74	15.77	15.81	16.35	15.27	14.61	14.54	15.3	15.07	15.51	14.31	14.74	14.3	16.35	14.35	14.57	14.93	14.37	15.72	14.33	14.87	14.73	14.31	14.65	14.32	15.27	14.48	15.19	14.82	14.94	14.77	15.08		14.31	14.18	14.92	14.5	15.11	14.03	14.7		14.8	14.58	15.99	15.12	14.58	14.44	14.38
1/O00411																													14.37
1/O00418		19.62	19.37	17.64	20.15		21.52	20.13		18.99	19.98	19.27	20.8		19.91	20.64	20.44	18.77	19.95	18.11	21.21	19.62		19.91	19.89		19		21.15	19.41			20.99	19.2	19.93	20.13	18.96		20.76			18.21	19.97	20.85	19.55		20.02		20.16
1/O00422			15.32	15.39	15.3			14.94	15.04						15.11			14.8		15.15				15.05			14.98		15.2		14.98		15.07			15.44			14.69							15.45
1/O00423																					15.2
1/O00425			16.41	15.51	16.72		15.71								15.44			16.49
1/O00429	13.86	14.59	15.69	15.16	15.53	14.79	15.4	14.75	14.15	14.02	15.09	14.17		14.71	15.11	14.21	14.35	14.67		15.16	14.51	14.24	14.18	14.63	14.05	13.86	14.38	14.3	14.11	14.42	14.56	14.95	14.43	13.28	14.27	14.24	13.98	14.55	14.66	14.04	14.56		14.21	14.22	14.85	14.95	14.02	14.09
1/O00442	15.1	14.92	15.74	15.83	16.25	15.64	15.95	15.17	15.64	15.05	16.12	14.57	14.98	15.04	15.46	15.29	15.14	16.08	15.2	15.51	14.59	14.99	14.92	15.6	14.74	14.64	15.55	15.05	15.15	15.33	14.87	15.77	15.48	14.63		15.38	15.38	14.49	15.75	15.29	15.26	14.98	15.1	15.1	15.48	16.42	15.15	15.19	15.12
1/O00443			16.55
1/O00461																																16.16	17.13					17.04						15.91
1/O00462					15.49																												16.44			14.81
1/O00468			14.75	15.19		15.54	15.74	15.3	15.47	14.5	15.12		14.05	14.65	16.86		16.08	17.47	14.75	15.76	15.82	14.45	14.52	17.31	14.31	14.28	15.72	14.58	15.18	14.73	16.69	18.9	14.91	16.67		16.53	14.46	15.54	15.22	16.18	16.56	16.5	14.83	14.53	16.3	14.86	14.32	14.8
1/O00469	16.49	16.16			16.53						16.71	15.71					16.99			16.59	16.68	16.03				15.95	16.63		16.51	16.13		16.99	17.19	16.08		16.36	16.38		15.77	16.53	16.96		16.22	16.19	16.7	16.35	16.15	16.34	16.22
1/O00471					15.97												15.12																15.78
1/O00483		17.54	16.81	18.07	16.9	15.69		17.44	16.74	16.24		17.15	16.94	17.47	15.78	16.97	16.63		17.08	16.36	15.52	16.25	17.32	17.78	16.41	16.9	16.81	17.29	16.77	16.46	16.03	15.78	16.17	16.14	16.51	16.91	17.12	16.25	16.15	16.1	15.92	16	16.99	16.99	15.8	17	17.34	17.77	17.11
1/O00487	15.5	15.71	16.09	16.22	16.25	15.85	16.33	15.88	16.18	15.58	16.19	14.98	15.82	15.62	15.99	15.15	15.82	15.81	15.49	15.95		15.78	15.51	15.74	14.94	15.34	16.23	15.53	15.71	15.56		15.79	15.99	15.96	15.93	16	15.3	15.12	16.02	16	15.88	16.03	15.92	15.69	15.54	16.43	15.29	16.14	15.51
1/O00499									15.39	14.63						14.73		14.84									15.03	15.05								15.06									14.69
1/O00505		14.03	14.49	14.49	14.88	14.71	14.12	13.92	14.71	13.91	15.22		14.01	14.32			14		13.94	14.95		14.02	13.78		14.13		15.07			13.9	14.13	14.12	14.13	13.92					14.4	13.82	14.34		14.57	13.97		14.38
1/O00506																		15.98						15.87								16.54							15.98
1/O00515								15.15										15.8		16.99				15.68			15.49					15.53				16.43
1/O00519			15.44		15.6
1/O00534									15.33																						15.54															15.48
1/O00541				13.67	13.88	13.85	13.9	13.76		13.41	14.47		13.79		13.92		13.71			14.3	14.11	13.63	13.72	13.76						13.14	12.96					13.96		13.55	13.44	13.59					14.16	14.47	13.58		13.54
1/O00560			14.31		14.57	15.2					15.99				14.4																14.4		13.89					13.98							14.22	15.26
1/O00566
1/O00567	14.57	14.26	14.69	15.26	14.73	15.48	14.86	15.49	15.97	14.59	15.31		14.46	14.75	15.21	14.76	14.43	16.91	14.78	15.29	14.27	14.55	14.3	15.31			15.61	14.39	14.72	14.72	15.16	15.23	15.23	14.8		15.82	14.34	14.6	15.17	14.65	14.95		14.46		14.91	15.79		14.62	14.04
1/O00571	16.06	15.56	16.4	16.29	16.39	15.86	16.07	16.34	16.23	15.71	15.89	15.18	15.14	15.17	16.64	15.67	15.85	16.15	15.62	16.7	15.4	15.61	15.23	16.32	15.79	15.23	16	15.34	15.8	15.73	16	16.24	15.71	15.64	15.46	16.47	15.78	15.2	16.01	15.36	15.88	15.77	15.26	15.78	16.37	16.87		15.71	15.59
1/O00584	15.06	14.88	14.98		15.6	15.56		14.28	14.22	15.57	15.68	14.48	14.4	14.33	15.18	14.08	15.04		15.02	14.86		15.57	14.3		13.29	14.32	14.46	14.11	14.8	15.63				14.19	14.32	14.87	14.83		15.05	14.57			14.37	14.71			14.43	14.75	14.54
1/O00592					14.11			14.49			14.58													14.65												14.66				14.24					14.27
1/O00602	18.67								18.09	21.27						19.36			20.48			20.66		18.58	16.45	17.54	17.59	19.56	17.77							18.3	21.27					16.99
1/O00622
1/O00625		14.63								14.26			14.36	14.14									14.82				15.23	14.1	14.88						14.34								14.74	15.02
1/O00635
1/O00712																				15.25							15									15.12
1/O00743									16.6
1/O00746																									18.03																							16.06
1/O00748	17.59	17.57	16.63	17.32	16.32	16.35	15.99	16.93	16.17	17.96	16.92	17.38	17.24	17.82		17.69	17.22		18.03	15.96		17.87	17.82	16.03	17.24	17.61	18.51	17.41	17.23	17.91	15.27		14.93	17.01	17.65	16.6	17.43	15.7		17.3	15.5	17.21	18.03	17.03	15.84	17.33	17.51	17.62	17.8
1/O00750																								15.82
1/O00754			15.44					14.95							15.2					14.66									15.49				15.3	14.99		15.47		14.15	14.77			15.51						15.08
1/O00757		17.95	17.73	17.69	18.51			16.89		18.19		18.97	19.16	18.53	15.35	17.42	18.18		18.38			17.99	18.54	16.79	17.06	18.42	17.48	18.62	17.23	17.85				16.73	19.41	15.9	17.79	15.62	15.56	16.37		16.69	18.7	18.71	15.78		18.19		17.97
1/O00762																																												14.96
1/O00763	15.7		14.94							15.56		15.36				16.27						15.74	16.23			15.76									15.94		15.67						15.74	16.12			16.2		16.52
1/O00764	15.79	16.31	16.28	15.84	16.44	16.62	16.52	15.88	15.98	16.09	17.65	15.87	15.49	16.09	17.29	15.68	16.48	16.45	15.96	16.76	15.79	16.2	15.89		16.24	15.73	16.06	15.92	16.04	16.31	16.06	16.37	16.6	16.26	16.24	16.17	16.09	16.07	16.78	16.38	16.25		15.79	16.3	17.03	17.08	15.54	16.15	15.81
1/O00767		15.22						15.34																												15.24			15.03						15.64	18.83
1/O14497												15.88	16.86																						16.16		15.37		14.75
1/O14521												16.05															18.32
1/O14524																									14.37
1/O14526
1/O14530		12.89		14.47	13.8		13.76								14.01					13.96	13.07						13.9	13.32	13.51				13.34			14.59	13.2		13.38							14.75		13.48
1/O14531
1/O14544
1/O14545																																														16.4
1/O14548
1/O14556
1/O14558					15.87	14.95		15.69							15.47	15.26	16.29	15.76		16.06	18.2				15.32				15.33		17.94		15.76	15.9			15.35	18.31	15.72	16.44	18.04	16.03
1/O14561	15.33		15.59	16.65	16.11			15.89	15.41	14.99			15.91	15.14	15.36	15.38	15.18						16.12	15.33		15.82	15.05	15.11	15.59	15.56				15.51	15.28					15.11		15.23	16.49	15.57		15.36	15.86	15.44	15.92
1/O14562															16.17																											14.67
1/O14578																					17.51										17.1
1/O14579	15.42	16.05	15.8	16.2	16.58	15.82	15.73	16.18	15.76	15.74	15.68	15.45	15.28	15.52	16.76	15.86	15.68	16.14	15.59	16.53	15.63	15.54	15.82	16.36	15.64	15.47	16.26	15.18	16.24	15.6	15.91	16.02	16.2	15.71	15.4	16.33	15.61	15.29	16.23	15.98	15.95	15.28	15.59	15.89	16.07	16.87	15.51	16.02	15.74
1/O14617				14.97		14.92	14.85								15.16					15.63				15.01			14.92		14.65		14.8	14.84	14.95			14.7			15.2						15.21	15.52
1/O14618		14.81		14.89	14.58					14.94	15.04	15.26	14.97	14.7	14.71		15.07		15.04	15.59		14.94	14.83		14.77	14.96	15.14		15.25	14.81			14.38		14.85	14.86	14.96			14.72			14.98	15.07
1/O14639																						15.72			16.13				15.37													15.64	15.84	15.71
1/O14646																13.73
1/O14653				15.88	15.19			14.98												15.35				15.5			15.31						14.56				15.07				14.61			15.37		15.36		14.97	14.83
1/O14654											17.79														17.7			17.62				17.21						17.77	18.05
1/O14656				14.99
1/O14657		13.86																						14.51																						13.91		14.11
1/O14662																		13.38																		14.42					13.78
1/O14672															15.34																					15.2
1/O14681				16.4	16.09					15.38						16.03						15.94		16.22			15.43																			16.12	15.83
1/O14683																				15.01
1/O14727
1/O14732																		15.83							16.32
1/O14733	16.07	15.65														15.83							15.75			15.5																	15.97						15.81
1/O14734																																														15.03
1/O14735						14.94				15.66				15.77	15.91			15.68		15.79		15.94		14.39			16.13			15.76	15.22							15.1	15.37					15.3		16.18			15.68
1/O14737	15.14	15.44	16.97	16.87	17.1	15.58		15.27	15.92	15.32	15.44	14.47	15.65	15.76	15.36		15.63	16.22	15.85	16.54	14.81	15.49	15.66	15.75		15.65	15.85	15.43	15.53	15.08	15.75	16.42	16.21	16.02	15.86	15.87	15.75	15.38	15.95	15.92	15.65	16.09	16.01	15.61	16.69	16.13	15.36	15.65	15.5
1/O14744			16.31	16.26	17.02	15.97	16.19	15.76			16.07			15.64	15.88			16.02	15.17		14.93			15.66							15.03	15.31		15.32	15.76					15.47	15.22	15.41			15.72	16.52
1/O14745	14.69	15.45	17.21	17.09	17.68	15.79	15.65	15.39	15.69	15.14	16.97	14.38	15.27	15.32	15.51	14.89	15.34	16.36	14.97	16		15.18	15.22	15.42		15.29	16.3	15.27	16.35	14.77		16.75	15.34	15.32	15.22	16.1	15.23	14.79	15.42	15.24	14.72	15.55	16.1	15.26	15.83	15.99	15.23	15.68	14.61
1/O14757						16.35							16.36																16.53		15.87			16.61										16.15
1/O14772									14.64
1/O14773	19.99	19.31	19.81	18.84	19.39	17.06	15.75	18.82	18.96	20.04	18.11	18.61	19.59	19.52	19.9	19.56	18.93	17.81	19.29	18.48	17.49	20.13	19.52	19.47	18.6	18.91	18.97	18.73	20.61	20.04	18.95	18.75	19.02	18.46	18.99	20.29	20.25	18.64	18.99	18.45	19.09	18.62	19.36	19.2	19.23	21.36	19.08	20.08	19.74
1/O14776			15.82	16.12	16.11	15.94	16.22		16.25		16.75									16.25				16.09			16.36						16.44			16.18			16.34		16.06					16.1
1/O14777																																														17.52
1/O14786																															14.98										15.01
1/O14787																16.33												15.94
1/O14791																																												16.94
1/O14795																						14.6
1/O14802
1/O14817																																										19.27
1/O14818	15.66	16.2	15.68	16.82	15.97	15.46	15.04	15.52	16.22	16.11	15.25	16.1	15.57	15.84	15.99	15.48	15.86	15.13	16.13	16.3		15.94	16.37	15.76	15.32	15.89	15.94	16.01	16.25	16.14	16.19	15.35	16.07	15.83	16.19	15.21	15.88	15.82	15.91	15.72	15.19	15.11	15.78	16.76	15.81	15.81	15.96	15.74	15.75
1/O14828				14.98	15.04				14.29									14.6		14.92				14.68			14.57						14.4			14.65										15.46
1/O14832	15.96	16.44	16.19	17.73	16.24			17.22		16.24		16.41	15.86	16.67		16.73	17.1		16.06	17.46		15.54	16.52	16.19	16.19	16.32	16.89	16.65		15.68				15.98	16.7	16.45							16.29	16.33			16.56	16.41	16.42
1/O14841	15.67	15.86		16.17				16.42		15.68		15.69	15.72	15.87	15.85	16.15	15.79		15.65	16.34		15.72	15.69	16.23	15.87	15.69	17.48	16.2	15.3	15.72		15.42	15.53	16.25	15.9	16.32	15.58		15.43	16.13		16.25	16.22	16.12	15.82		15.87	15.68	16.1
1/O14874	15.16	16.06				15.13		15.97	14.5	15.76	15.37	15.92	15.49	16.65	14.65	16.26	15.64		16.09			15.92	16.33	15.06	15.82		15.07		15.78	15.66	14.76			15.78	15.96		16.07	14.65	14.49			15.45	15.56	16.16	15.42	16.12	16.43	16.2	16.59
1/O14879	14.38	14.3		13.4				13.33		14.47			13.89		14.43	13.8		14.3				14.49	13.95				14.82	13.41	13.67	14.17	13.67			13.86	13.89		14.19		13.78	13.96		13.72	13.69	14.16	13.74			14.28
1/O14880	16.27	15.93			15.97	17.43	17.52	16.15		15.92	16.08	16.3	16.02	16.41	16.19		16.83		16.61		17.19	15.85	16.47			16.27		16.41	16.71		17.75		16.63		16.36	16.24	16.01	18.72	16.55		17.76			16.83	16.37		16.52	15.88
1/O14893																																	15.14						15.22
1/O14896			12.95			13.11				12.93				12.72	13.51					14.8				13.97		11.79	14.11		13.32								12.96			12.8					13.87	14.3
1/O14907						14.94		14.46			14.82				15.69			15.13		14.89	14.85										14.94	15.42		13.99		14.51		14.99	14.42		15.09	13.85						14.04
1/O14908				15.65					16.18		16.11	15.28						16.47		16.24				16.04								16.37						16.81				15.29
1/O14920			15.7
1/O14929			14.65	14.75	14.65										13.63																								13.62							15.1
1/O14933		15.34	15.12																								15.79		15.77
1/O14936			14.94	14.59	14.84	15.05	14.78			14.32	15.43				14.64		14.75	14.99	14.77	15.04	14.57		14.55	14.98	13.92		14.46		14.57		14.75	15.05				15.16	14.44				15.45			14.21	14.21	14.67		14.54	14.19
1/O14948																				16.13
1/O14949	16.55	17.58		17.36	16.35	16.53		17.99		17.31	17.89			17.57	16.66		16.46			17.12		17.4		16.78			16.37		17.03	17.31				16.17			17.37	16.01		17.55		16.12				17.58	17.31		17.6
1/O14957												15.34
1/O14964			15.68	15.34	15.99			15.07	15.4		15.27			14.88	16.1	15.02		15.62		15.49	15.18	14.88		15.41	14.8		15.59		15.01		15.2	15.33	15.14	14.83		15.43	14.94		15.24		15.13	14.88	14.87		15.48	15.28		15.17	15.15
1/O14966		15.62																												15.79																16.47
1/O14967			15.66		16.36
1/O14972	17.05																		16.86																							14.9
1/O14974		15.14			15.36			15.46						15.02	15.41		14.62	15.49		15.56	15.46	14.95		15.76			15.4		15.47				15.25			16	15.37					14.63				16.19
1/O14975	17.24	17.62	16.04	17.33	16.67			17.21		16.91		17.4	17.42	17.38		18.11	17.21		17.7			16.82	17.61		17.32	17.31	17.09	17.02	16.98	17.05				16.88	17.47		17.2			16.87		16.81	17.48	17.36		17.4	17.78	17.89	17.85
1/O14976	15.28																														16.44
1/O14979	15.44	15.96	17.31	16.82	17.14	15.92	16.49	16.5	17.58	15.7	15.82		15.84	15.64	17.4	15.7	15.8	17.64	15.68	17.41	16.28	15.6	15.49	16.82	15.48	15.6	16.45		16.03	15.81	16.25	16.78	16.93	16.04	15.8	17.64	15.86	16	16.93	15.92	16.31	16.13	15.85	15.92	16.86	17.62	15.5	16.17	15.43
1/O14980		13.94	14.3	14.97	14.94	14.66	14.66	14	14.69	13.87	15.23	13.17	13.11	13.97	14.66	13.71	14.45	14.11	13.49	15.13	13.38	13.98	13.63	14.77	14.02		14.99	13.85	13.77	13.9	14.61	14.11	14.65	13.72	13.87	15.18	14.05	13.96	14.52		14.11		13.54	14.04	15	15.51	13.49	13.92	13.51
1/O14981																				14.88				14.83						14.29														14.74
1/O15013	17.11	17.99	18.35	17.4	18.15	19.36	17.47		17.98	17.18	17.55				18.43	17.57		17.59	16.83	17.57	18.92	17.25		18.68	18.86	17.3	18.05	17.67	17.75	17.34			18.7	18.04		17.57	17.49	17.7	16.56	18.37	17.95	18.05	17.74	17.21	19.11	19.04		17.6	18.76
1/O15014																																														15.96
1/O15020														15.98		15.96			16.18						15.54										15.61								15.83	15.69
1/O15021
1/O15027	17.29				17.35	17.2		17.85	17.79	17.15	17.56	16.35	17.28	17.13		17.06		17.83	16.82	17.85	16.79	17.06	16.92	18.1	15.84	17.02	17.67	17.1	17.46	16.92	17.37			17.34	16.85	17.93	16.79	16.94		17.05	17.55	17.13	17.07	16.76	17.59	17.89	17.04	17.21	17.08
1/O15031		14.78			14.28		14.42		14.49					14.54						14.46			14.92	14.86			14.26			14.49		14.07	13.85	14.1								13.73	14.45	14.95	13.58	14.52	14.07	14.74	14.22
1/O15037
1/O15042		18.78	18.12		19.09	16	16.19	15.27	16.18		16.35			17.68	15.82	17.53		16.07		15.83	14.97	18.79	18.91	18.43			18.31	18.42		18.31	15.09	15.39	15.68	17.54		17.37	17.17		15.77	15.92	15.71	16.23	17.81	18.35	16	17.88
1/O15047													16.16
1/O15049	17.01	17.24										18.1	17.39	17.43		16.94	16.58					17.67				18.21	16.17	17.76	17.22	17.55					17.55								18.01	18.12			18.05	16.98	17.56
1/O15056				15.78			16.07
1/O15061											15.67					15.94		15.73											15.57											15.86		15.84
1/O15063																	15.06							16.06	15.14																	14.14
1/O15067		15.2		15.71	15.54				15.78				15.48		14.85	15.54		15.41	15.27	15.47	14.38						15.62	15.06	15.41							15.48		15.39	15.27		15.06			15.17					15.31
1/O15068																																								19.45
1/O15075	17.75	17.74			17.96			16.85		16.96												17.73	18.02		16.22		19.46	17.25						17.21						18.38		17.26		17.37			17.34		17.69
1/O15084	13.92	15.9	15.68					15.45		15.22				15.53		15.72	15.46					15.39		16.01				15.45		15.92			15.49	15.53		15.09	16.04					15.46					15.43	15.85	15.55
1/O15091		15.37														13.28																	15.6
1/O15111											13.72																																			14.07
1/O15116	15.57							15.36																																	16.26
1/O15117			17.14
1/O15118			16.63	16.59	17.41	16.65	16.43	16.65			17.31	15.95	15.36		17.37	15.5	15.66		15.95	17.55	15.81		16.34		16.19		16.51		17.2	16.11			16.73	15.82		16.23	16.08			17.12	15.67			16.65	17.39	18.13
1/O15120														17.15												17.36
1/O15121													16.27						15.64
1/O15126																																							15.79
1/O15127															14.94					15.27													15.13								14.68
1/O15143	15.49	15.7	15.61		16.1	16.51	16.17	16.44	18.4	15.48	16.41	15.03	15.36	15.36	16.59	15.13	16.15	16.95	15.26	16.72	16.43	15.76	15.39	16.4	14.92	15.19	16.79	15.34	16.3	15.77	16.54	16.73	17.44	16.47	15.17	16.7	15.44	16.65	17.4	16.38	16.77	16.38	15.25	15.54	16.77	16.17	15.11	16.47	15.29
1/O15144	16.39	16.58	16.73	16.3	16.68	17.2	16.85	16.82	18.81	16.46	17.82	16.57	16.36	16.58	17.17	16	16.93	17.21	16.27	17.6	16.79	16.57	16.58	17.39	16.3	16.18	17.06	16.22	16.78	16.7	17.25	17.3	17.73	16.64	16.49	17.27	16.67	17.11	17.91	16.69	17.06	16.64	16.5	16.47	17.54	16.99	16.21	16.75	16.14
1/O15145	15.83	16.27	16.26	15.95	16.38	16.85	16.96	16.53	18.12	16.42	17.34	15.83	15.79	15.7	16.86	15.97	16.31	16.82	16.23	17.32	16.75	16.18	15.89	17.12	15.96	16	16.83	16.05	16.51	16.3	17.02	16.68	17.1	16.37	15.82	17.1	16.31	16.66	16.97	16.39	16.7	16.12	16.04	16.19	17.13	16.6	15.62	16.23	15.91
1/O15156
1/O15160	15.72	15.95	15.63	15.86				15.43			15.38	15.89		15.33	15.97	15.69	15.41			15.96			16.32	15.92					16.27	16.11	15.79	13.63					15.91		15.68	15.1		15.81				16.08		16.16	15.48
1/O15173	17.46	16.9	16.85	17.3	17.19	16.14	16.58	16.99	16.64	17.04	16.13	16.71	16.89	17.16	16.66	17.39	16.9	17.1	17.21	16.55	16.45	17.12	17.12	16.21	16.5	16.89	16.91	17.05	17.22	17.15	16.42	16.65	16.45	17.16	16.55	16.29	16.69	15.66	16.38	17.38	16.62	17.19	17.01	17.02	16.18	16.82	17.29	17.34	17.54
1/O15182																					16.65																			15.66					16.12
1/O15195							18.33								15.33
1/O15204
1/O15211
1/O15212	15.1		16.87		16.69	15.59		15.98		15.43	16.11			15.54	16.7	14.65	15.23		16.5	16.87		15.61				15.15	16.86	15.09	15.58	15.5	15.31		15.91	15.53	15.32	16.91	15.27	15.39	15.94	15.56	15.41	15.52		15.28	16.29	16.4	15.09
1/O15213
1/O15226				17.77																											17.13
1/O15228												14.58					13.7			14.74				14.4				14.04										14.53
1/O15229	15.26							15.3		15.41		15.1	14.75	15.55		15.2						15.35	15.63			15.09		15.58		15.37				15.24	15.3		15.61			15.88		15.21	15.71	15.47			15.8		15.95
1/O15230	15.12		14.47	14.95		15.95		15.83	15.79		15.3		15.32	15.36	16.53	15.92	16.03	17.88	15.15	15.27	16.98		15.18	16.78	15.06	15.12	15.85	15.15		15.15	17.46	18.1	15.52	16.18		15.76	14.68	15.85	15.25	16.01	17.59	16.23	15.36	15.29	15.84	14.87		15.49
1/O15231											15.76																															16.08
1/O15240																																															13.42
1/O15247									14.82																														14.18
1/O15254	14.39	14.76				14.92	15.31	15.35		14.5				14.42	14.54		14.84					14.68				14.48	15.25				15.35				14.84		15.03				15.27		14.74					14.54	14.64
1/O15258																								15.55																						16.05
1/O15260	16.85	17.86	18.12	17.95	18.4	17.18	17.05	17.89	16.71	17.4	17.55	17.11	17.15	17.35		16.77	16.91	17.14	16.9	18.65	17	17.43	17.24	17.8	16.74	17.36	18.5	16.95	17.84	17.42	17.11	16.91	17.53	17.09	17.38	17.19	17.13	16.97	17.6	17.29	17.16	17.06	17.29	17.53	17.72	18.1	17.17	17.54	17.55
1/O15264						15.81									16.15																					16.69							15.93			15.77
1/O15269																																								16.11
1/O15270					16.03																														16.3												16.18		15.85
1/O15287
1/O15294		17.33	18.12		17.53				17.71		17.13	16.94			17.79			17.28		18.99				18.65	18.71	16.9	17.49							17.63								17.55	17.25		19.15	18.3			18.07
1/O15305		15.24	15.36	16.34	15.64	15.63	16.01	15.37	15.16	15.19	15.72	15.38	15.7	15.14	16.36	15.02	15.37	15.93	15.08	15.52	14.54	14.74	15.22		15.2	15.26	15.63	15.05	15.66	14.92	15.03	15.78	15.56	15.18	15.19	15.55	15.31		15.83	15.19	15.02	15.17	15.22	15.09	15.68	15.16	15.16		15.06
1/O15320				14.95	15.68			15.47				15.26		15.58					15.63					15.59		15.36	15.68																	15.47			15.13
1/O15321															15.06									14.74																						15.29
1/O15327					16.29													16.85
1/O15344									15.42
1/O15347		14.87	17.53	16.66	18.09	16.6	16.53	15.23		14.93	15.42		14.7	14.51	15.79		16.31			15.21	16.5	15.1	14.75	14.75			15.7		16.11	14.4	17.03	15.16			14.28	16.73	14.6	18.16	15	14.34		14.82	14.65	14.6	15.87	17.24	14.53	15.14
1/O15355			14.16	14.21	14.67	13.53												13.41		14.32													13.55
1/O15357			16.89		17.79																												16.99			16.44			16.32							17.49
1/O15371	15.61	16.31	16.07	16.91	16.73	18.25	16.51	16.26	16.28	15.92	16.47	17.46	17.37	15.93	16.67	15.9	15.95	16.51	15.72	16.8	15.88	16.08	15.8	16.67	15.65	15.4	16.38	15.74	16.29	15.81	16	15.9	16.59	15.78	17.8	16.69	16.15	15.83	16.56	16.31		15.89	17.61	15.99	16.44	16.79	15.53	18.48	15.76
1/O15372			15.15	15.76	16.05	15.24	15.39	16.07			15.27			15.16	15.78	15.16		15.38	15.37	16	15.25			15.7	14.83		15.68				15.81	14.96	15.55	15.27		15.48			15.44	15.3	15.61		15.11		15.9	15.84
1/O15379																					15.89
1/O15381					15.68	16.94																																			16.87
1/O15382	17.2	17.71		17.58	17.06		15.02	18.07		17.3			17.96	18.19		17.92	16.79	17.29					17.43			17.51		17.92				16.97		17.3	17.11									17.17		17.63
1/O15393						13.64					14.23
1/O15400		13.97		14.37	14.44	15.23	14.36	14.52	15.51	14.14	15.11				15.1		14.64	14.99	14.05	14.76	15.33	14.26	14.09			13.5	14.7			13.91	15.18	14.76	15.47	14.41		14.71		15.28	15.64	14.91	15.2	14.14			15.08	14.41
1/O15417																																					16.6
1/O15427																	13.79
1/O15438															15.02			15.28						15.34
1/O15439		18.19											17.81																											16.65		16.13				16.27
1/O15446		16.29			16.9								16.51
1/O15460															17.5						17.17												18.1			18.74					16.89
1/O15479
1/O15484			15.75		15.71	15.15	15.65	15.08			15.51			15.13	15.21		14.92			15.39			14.93				14.81		15.04		15					15.57										15.12			15.16
1/O15488	14.4	14.6							13.94	14.55		13.99	13.87	14.17	13.27		14.45		14.5			14.72	14.69					14.55	14.19	14.66					14.74		13.98						14.07	15.47			14.4	14.04	14.45
1/O15496												16.36							16.62												17.61							18.7
1/O15498		15.81			16.88			17.2	17.57				16.11		18.14	16.07	16.43					16			16.07		16.11	15.55		16.16			16.94	17.96		17.55	16.7		19.1						18.82
1/O15511	16.99	17.26	17.46	16.36	17.61	18.39	18.27	17.87	19.36	17.16	18.5	16.45	16.81	16.78	18.35	16.39	17.59	18.6	16.76	18.55	17.96	17	17.03	18.01	16.51	16.64	18.75	16.84	17.79	17.27	18.44	18.38	18.93	18.02	16.62	18.64	17.17	18.61	18.69	17.84	18.49	17.98	16.89	16.94	18.38	18.02	16.54	18.15	16.71
1/O15514																																									17.54
1/O15523	16.1	16.39	15.88		16.18			15.87		15.69	16.11	16.43		15.8	16.23	16.14	15.88		16.04										16.43	16.39		16.39		16.14	16.15	15.79	16.52			15.69		15.53	15.9		16.14			16.38
1/O15530																																										16.65
1/O15533	16.92		16.96	17.36	17.21	16.7		17.38	18.34	16.47	17.41			15.95	17.75		16.41	17.14		16.71	16.79	16.39		16.93	16.15		17.99		16.88	16.54	16.97	16.78	17.96	17.24		17.19	16.41	16.06	17.72	17.11	17.01	17.26	16.6	15.98	18.39	17.12		17.63
1/O15540			17.59					17.48		16.99	16.07	17.07		16.82		16.94		17.01	17.32						16.67	17.06					17.77			17.44		17.59	17.68										16.81	16.36
1/O43143	15.33	14.97	15.69	16.22	15.87	15.17	15.83	15.68	16.02	15.15	15.27	14.06	14.59	15.13	16.38	14.78	14.99	16.09	14.77	15.71	14.83	15.15	15.06	16	14.39	14.39	15.92	14.83	15.2	14.99	15.15	15.89	15.65	15	15.11	15.89	14.83	14.66	15.39	15.08	15.44	15.17	15.21	14.69	15.59	15.81	14.46	15.29	14.85
1/O43148							14.81											14.45		14.44												14.82
1/O43149
1/O43150								15.41
1/O43156		15.11						15.76				15.88	16.61	16.44		16.06							15.67					16.21		15.55							15.63												15.37
1/O43159																																				14.99										14.99
1/O43166																																														16.38
1/O43169	15.27	15.31	15.41	15.14	15.23	15.86	15.28	15.14	15.36	15.3	16.11	14.98	15.07	15.65	15.13	15.63	15.09	15.11	15.55	15.35	14.64	15.07	15	14.79	15.22	15.18	15.46	15.12	14.7	15.03	15.14		14.72	15.1	15.18	15.41	15.3		14.88	15.03	14.79	14.82	15.62	15.24	15.5	15.42	15.21	15.44	15.62
1/O43172	14.85		14.97	15.86	15.4			15.23							15.31					15.42				15.64			15.23					14.77				15.32			14.66						15.14	15.69
1/O43175	18.16	18.07	16.98	17.77	17.83	16.51		16.84	17.74	18.2	17.14	18.49	17.98	18.45		18.35	18.66	17.81	18.18	17.41	15.35	18.2	18.67	16.4	18.47	18.54		18.61		18.15	16.1	15.86	16.4	17.06	18.78		18.21	15.57	16.55	16.92	16.06	16.81	18.73	19	19.24	19.2	18.6	18.1	18.41
1/O43181	15.53	16.27	15.92	14.95	15.45			16.42	15.94	15.74			16.08	16.3	16	15.83		15.38	15.76	15.67		15.95	16.22	16.43		15.93	15.89	15.76	16.31	15.88			15.43		16.01	15.78	15.92		15.77		15.54		16.58	15.97		15.66	16.35	16.29	15.87
1/O43182
1/O43187
1/O43237							15.46								15.08			16.31													15.73								14.89		15.5				15.28	15.13
1/O43242	14.16	14.92		15.03	15.52	15.32	14.6	15.02	14.15	14.95	15.37	14.56		14.75	15.48	13.64	14.57	13.78	14.41	15.67	14.8	14.71	14.68	14.17	14.4	14.26	14.89	14.08	15.08	14.89	14.26	14	14.88	14.13	14.65	15.08	14.57	14.93	15.08	15.21	14.61	13.73	14.06	15.21	15.2	15.63	14.46	14.52	14.53
1/O43252		17.58		17.4		15.56				17.43	15.24	17.01	17.89	17.37	16.91		17.03		16.77		15.56			16.13	16.69					17.07	16.08	16.49			17.05	16.14	17.41				16.44	17.36	17.73	17.16	17.01	16.71	17.11
1/O43264	13.14	13.09	14.04	13.93		13.09		13.24			13.41			13.27		13.15				14.06				13.5			13.37			12.93						13.29						12.69				14.16			13.3
1/O43272				15.66
1/O43278			19															15.25	15.6						15.28												17.7											18.59
1/O43290	16.35	16.63												17.08											16.14					16.75
1/O43291																																			15.91														16.67
1/O43293
1/O43294					16.86			17.41						16.96			16.62	16.95		17.12	15.75		17.18	17	17.57						15.49	16.05		16.7		17.15		15.91	16.42	17.09	15.25	16.66			16.65
1/O43295
1/O43301																								15.48
1/O43303		15.67	16.21	15.57	15.5	17.14	15.49				15.07				15.05		14.74		15.14	16.77	16.99		15.29	17.12	16.62	14.78			15.36				16.19	15.48		15.72	15.75	15.5	16.11	16.8		15.46			16.59	16.47	15.03	15.69	15.54
1/O43306
1/O43310							15.83
1/O43312
1/O43314
1/O43318				13.97																																									13.73
1/O43324	15.19	15.31	15.43	15.75	15.66	15.53	16.34	15.63	15.61	15.25	15.74		15.16	15.44	16.63	15.5	15.58	15.79	15	15.83	14.8	15.06		15.96			15.88	14.82	15.38	15.01	15.51	16.37	15.36	15.34	15.22	15.63		15.4	15.26	15.48	15.35	15.24	15.56	14.97	15.78	15.88		15.37	15.21
1/O43353			15.69		16.43								15.58													16.38			16.7			15.57			16.56	15					14.63	15.46						15.35
1/O43379		17.94	16.93		17.4			17.08		16.7		17.7		18.54		17.08	16.12		17.53			17.18	18.71			17.06			17.06	17.05													17.46	18.18			18.1		17.62
1/O43390	16.1	16.06	16.68	17.42	16.72	16.62	16.11	16.74	17.74	16.15	17.04	15.35	15.61	15.89	16.96	15.98	16.33	17.31	15.8	17.41	16.04	16.22	15.69	17.37	15.68	15.75	16.94	15.61	16.05	16.11	16.4	16.94	17.07	16.2	15.53	17.26	16.09	16.39	17.09	16.3	16.34	16.21	16.13	15.81	17.05	18.11	15.65	16.18	15.98
1/O43395					15.89						16.66
1/O43396	15.86	16.2	17.84	17.44	18.19	15.82	17.93	16.47	17.04	16.08	16.15	15.44	16.12	16.18	16.81	16.31	15.97	17.61	15.82	18.11	15.65	16.19	16.19		16.14	15.89	16.8	15.77	16.41	16.16	15.77	17.06	16.42	16.6	16.32	18.29	16.1	16.06	16.55	16.54	15.88	16.7	16.55	16.2	16.97	17.45	15.73	16.33	15.79
1/O43399			15.53		16.25	15.66		15.9	15.79	15.27	15.74		14.76		16.48		15.39	15.91		16.7	15.7			15.62			16.52		15.99	15.72	15.89	15.77	16.54	15.42		16.21	15.47	16.39	16.37	15.25	15.82				15.46	16.48
1/O43402			16.65		17.23	16.02	16.08	16.54			16.64		16.2																16.26				16.31				16.24		16.45					16.55		17.34		16.91
1/O43414			15.85	15.74	16.27																						15.36																		15.59	15.69
1/O43426
1/O43427				17.5
1/O43432													16.09															16.11														15.96
1/O43447					17.42						16.64				16.6			16.89		16.67											16		16.38					15.71	16.4									16.52
1/O43451																													14.84																			15.2
1/O43463
1/O43464	15.8			16.34	16.17			16.07		15.56			16.22					15.96		16.15				16.34			16.14				16.13					16.22								15.61				16.14
1/O43474																															16.41
1/O43488	16.34	16.21	15.57	17.05	15.76	14.86	15.13	16.19	16.64	16.52		16.29	16.81	16.44	15.5	16.5	16.44	16.12	16.02	16.75		16.4	16.2	16.4	16.07	16.76	16.61	16.4	15.52	16.31	15.8	16.19	15.69	16.43	16.78	16.32	16.14	15.82	15.78	16.21	15.54	16.43	16.93	16.46	17.04	16.89	16.2	16.46	16.1
1/O43491						15.34		14.56	14.88		15.67		14.4				14.89			14.36	15			14.05			14.5	14.55			15.09	14.5						14.75	14.58						14.9	14.26		14.68
1/O43493																																														15.74
1/O43504	15.05	14.85	15.71	15.56	15.39			15.04	15.82	15.29			15.06		15.88		15.1	15.55	14.74	15.42	14.88	15.22	14.91	14.81		14.88	15.31		15.24	15.24	14.91	15.54	14.94	14.95	15.33	15.32	15.08	15.17	15.04	14.92	14.82		15.87			15.83		15.16
1/O43505
1/O43516																		20.7																								23.92
1/O43520	17.03							16.45					16.46				17.15				18.25						15.87	16.6	17.33		18.12							18.69						17.48			16.64
1/O43524																																	16.04
1/O43570																															15.83														16.62
1/O43572
1/O43583	16.28									16.35		17.16		17		17.33	16						17.11			16.61									17.05					16.6		16.36		16.48			16.99	17.01	16.89
1/O43586
1/O43592		17.77	17.93																		18.78																17.63								18.49
1/O43597
1/O43598															14.39					15.83							14.98		15.43		15.27									14.91				15.27	15.43
1/O43615	14.21		14.35	16.25	14.97	15.01	14.35	14.68		14.6	15.39	14.44			14.63	15.15		14.96		15.06	13.84	14.41		14.75	14.51	14.12	15.12	14.66	14.56	14.45	14.5	14.07			14.44		14.29			14.12		14.38	14.27		14.64	15.27	14.19	14.63
1/O43617		15.57	16.38	16.08	16.53		15.99	15.86	16.59		15.92		15.14		16.3		15.69			15.94	15.4			15.44		15.07					15.6	15.86	15.68	15.39		16.02		15.35	15.55		15.48	15.8			15.8	16.83		15.76
1/O43633		15.67	16.6	16.25	16.95	16.14	16.82	16.52	16.56	15.61	17.22	15.76	16.02	15.88	16.34	15.83	15.65	16.77	15.97	17.03		15.71	15.66	16.16	15.37		16.59	15.81	15.79	15.6		16.37	15.84	15.94	15.66	16.48	15.52		16.04	15.83	15.88	15.6	15.85	15.66	16.77	17.42	15.67	15.97	15.54
1/O43639													14.77	14.96									15.16																				14.52					14.85
1/O43660			13.21	13.72	13.49																															13.37
1/O43663			15.7								16.49					15.49					15.22							15.47
1/O43665													17.76
1/O43670		15.48	16.78	16.89	17.02			15.94			15.49		15.07	15.33	16.14		15.15	16.24		16.63	15.65			16.51		15.06	16.4		15.76	15.41	15.46	15.88	15.93	15.53	15.14	16.31		15.67	15.93		15.55	15.49		15.39	16.05	16.09			15.32
1/O43674	15.73	16.37		15.79				16.49		18.45			15.77	15.97		15.74	15.69		15.5			15.87	16.11	16.35		15.89		15.65	16.02	16.16						16.22	16						16.07	15.94		15.86	15.97	16.31	15.86
1/O43676												15.84		15.7	15.56								15.41						15.7														15.34	15.43			15.61	15.89
1/O43678	14.58	14.9	14.54	14.5	15.12	13.91	14.55	15.02	14.64	14.95		15.38	14.44	14.83	15.02	15.94	14.63	14.15	14.95	15.05		15.16	15.13	14.7	15.3	15.19	15.43	14.46	15.64	14.77	14.38	14.63	14.46	14.27	15.13	14.56	15.14	14.43	14.5	14.62	14.62	13.93	15.44	15.17	15.12	14.73	15.01	14.66	14.86
1/O43681		15.81	16.54	16.89	17.36		17.14	15.91	16.28	15.61	16.43				16.53	15.5	15.76	16.05	15.56	16.59	15.56	15.73	15.7	15.99	15.15		16.86		16.24	15.72	15.89	16.39	16.42	15.75		16.05	15.81	15.99	16.17	16.12		15.94		15.99	16.27	17.55	15.54	16.03
1/O43683
1/O43684	16.18	15.79	17.11	17.3	17.23	16.48	16.71	16.55	17.17	15.92	16.57		15.56		17.1	15.52	16.15	17.24	15.55	17.13	16.02	15.95	15.47	16.76		15.16	16.48	15.42	15.93	15.79	16.38	16.53	16.55	15.96		17.1	15.68	16.1	16.77	16.18	16.43	16.18	15.58	15.52	16.69	17.25		16.4	15.57
1/O43688																																															13.23
1/O43704		14.97										15.16	15.63	15.12		15.9							15.67		14.45	15.6		15.38							15.65								15.77	15.58			15.08	15.51	15.17
1/O43707	17.08	16.82	16.74	17.21	17.16	18.03	15.95	16.73	17.25	16.77	18.04	16.08	16.4	16.33	17.52	16.57	17.29	17.76	16.48	17.82	16.79	16.71	16.45	17.84	16.35	16.25	16.78	16.64	16.83	16.83	17.73	17.85	16.88	16.86	16.37	16.73	17.13	17.51	17.26	16.96	17.94	16.66	16.41	16.77	17.43	17.3	16.27	16.97	16.37
1/O43708	16.08	16.01		15.63				14.77		16.76		16.8	15.98	15.78		16.15	14.92		15.98			16.97	17.63	14.62	14.73	16.59		16.47	15.69	16.5				14.54	16.53	14.58	15.4			14.4			16.12	16.6			16.5	15.81	16.65
1/O43715													14.29																														14.58
1/O43716			16.14	15.64														15.25
1/O43719					15.71										14.43																															17.66
1/O43741	13.89			13.94						13.88		13.74	14.02		12.71	14.57		12.69	14.02				14.22	15.3	13.93			14.77															14.02	14.52		13.88	13.87	14.01	14.23
1/O43747	14.76	15.46	14.3	14.76	15.12	15.2	15.34	15.48	14.94	15.13	15.28	14.72	14.12	15.42	16.75	14.81	14.71	14.63	15.18	15.76	14.49	15.33	15.2	14.74	14.97	14.56	15.71	14.86	15.63	15.43	14.99	14.7	15.11	14.03	14.84	15.76	15.16	15.02	15.13	14.98	14.55		14.91	15.11	15.2	15.85	15.25	14.85	15.07
1/O43752																																														14.97
1/O43760						15.12									16.29					15.33																15.83
1/O43765
1/O43766																																										14.31
1/O43768							16.94
1/O43772		16.99		16.03				15.79		16.29		17.69		17.02		16.28	15.65	16.96	16.17	15.77		16.13	16.79		16.6	16.37	15.8	16.58		16.5		17.31	17.17	17.07	17.2	17.8	15.99			15.18			16.01	16.95	16.88	16.49	16.73	16.24	16.83
1/O43776	14.83	15.51	16	16.49	16.69	16.25	16.51	16.13	15.79	15.24	16.38	14.66	14.17	15.02	16.6	14.02	15	15.95	14.98	16.83	15.28	15.43	15.36	15.29	14.6	14.7	15.95	14.29	15.3	15.07	16.18	16.9	16.14	14.84	15.16	17.17	15.24	15.36	16.14	16.51	16.35	14.93	14.92	15.38	17.44	16.71	15.12	15.11	15.2
1/O43795	15.69	16.04		15.87	15.1	15.1		15.16		16.22	15.13	15.38	15.08	15.64	15.55	15.87	15.83	14.99	16.1	15.19	14.42	15.76	15.94	16.13	15.53	15.63	15.54	16.07	15.89	15.86	15.45	15	14.58	15.07	15.41	16.21	16.15		14.87	15.59		15.19	15.51	15.72	15.2	15.53	15.64	16.15	15.85
1/O43805
1/O43808																																									15.96
1/O43809		14.76	15.12	14.95	15.59	14.71		15.08	14.26	14.32	15.11	14.05		14.71	15.93	13.83	14.2	13.76	14.46	15.68	14.86	14.29	14.55	14.53		13.67	14.73	13.74	14.78	14.56	15.06	14.47	14.75	13.78		14.24	13.78	15.05	14.91	14.33	14.42	12.92	13.88	14.92	15.22	15.38	14.43	13.82	14.18
1/O43813				15.31	15.06	14.67	15.44	15.31	15.61				15.07	15.09	15.61		14.76	15.29		15.98	14.89			15.41	15.07		15.82			14.58	15.18	14.93	14.8	15.08		15.93			14.86	15.02	15.08	15			15.32	15.42
1/O43815	16.89												17.25
1/O43818															14.79
1/O43819						17.07		13.98													17.04				13.81								16.37	14.67					16.42			14.98			16.16
1/O43822															15.83									16.21
1/O43826														14.4																																			14.21
1/O43837		15.28	14.55	15.5	14.65	15.75		15.42	15.25	15.05	15.51				15.51					15.48		15.04	14.79	15.24	14.82		15.44		15.32	15.3	14.54	15.05					15.09		15.82	15.82		14.58			15.27	14.89	14.59	15.28	14.68
1/O43847	15.79	15.89	16.83	16.13	17.47		15.52		15.86		15.75				15.88					15.89							16.47		16.12	15.67			16.16			15.74			15.94				15.74
1/O43852	15.43	15.28	16.5	15.91	16.68	14.87	15.52	15.76	15.35	15.58	15.95		15.98		16.1	15.51	15.91	16.48	15.25	16.21	15.69	15.36	15.2	16.41		14.96	16.12		15.63	15.6	15.8	16.39	15.89	15.9	15.34	15.52	15.52	15.92	15.74	15.62	15.7	15.71	15.63	15.41	15.84	16.35		15.63	15.3
1/O43854																16.42									17.88
1/O43865			18.83		18.97		17.66		18.07						18.78					19.46	17.41			17.63			15.89					17.35			17.63						14.76	15				18.25
1/O43866
1/O43895		15.24										15.36							14.95	15.24			15.64		14.8		15.63	15.03	15.14						15.38							14.65	15.08	15.62			14.92	15.08	14.9
1/O43896									14.67		17.33							16.58													15.71	15.29							15.77			16.07						13.57
1/O43913						17.52									16.54						17.86																			16.88
1/O43920		15.02						14.98				15.06			14.94								14.72		14.9				14.56
1/O43929	16.9																											16.93	17.38				17.3						17.24
1/O43933	16.52																															16.18
1/O60216	15.77	15.65								15.68				16.2			15.63		15.51			15.86				15.77				15.55							15.28						15.91				16.05
1/O60218		18.09	15.29	18.23	16.7	14.84	19.28	22.58	15.8	16.98	15.27		17.85		17.26		17.01	16.22	17.9	16.25	15.24	17.02		22.17	16.83	17.4	16.35	18.21	20.77		14.91	17.12	19.6	20.25	18.32	19.61	15.22	15.18	19.7	22.61	15.08	22.51	17.44	18.62	20.29	18.89	17.92	18.02	17.85
1/O60220	16.16	16.07	17.7	16.09	18.15	16.24		16.01		16	15.92	15.65	15.94	16.43		16.38	15.68	15.44	16.51	15.67		16.24	16.77	15.54	15.31	16.4	15.94	15.52	16.78	16.11				15.23	15.54	15.33	15.92			16.49		15.46	17.22	15.79	15.32	17.04	16.38	16.02	16.4
1/O60229											16.26																															16.39
1/O60231		15.34	15	15.04	15.12	16.05		15.24		15.08	15.68	15.35		15.26	15.78	15.23	15.32	15.29		15.3	16.15	15.27	15.12	15.22	15.53		15.25	15.1	15.05	15.25	15.75		15.86	15.22	14.56		15.11			15.91	15.77	15.22	15.02	15.05	16.3	15.85
1/O60232			17.32															16.99																		16.79										17.01
1/O60234							15.59		16.06				14.77				14.93													14.47	15.2		15.28					15.53	15.99		15.39	14.78
1/O60237														12.5																								13.91
1/O60240
1/O60256		14.14		14.28					15.49					14.12			14.04	14.13	14.03	14.65				14.11		14.04		14.4		13.53				13.89	14.08	14.43	14.09		14.37			13.85		14.48				14.29
1/O60262									15.66
1/O60264	15.59		16.37	16.08	19.75				17.98	16.32					16.56		16.57									15.65	19.4	16.12										17.38										16.58
1/O60271	17.63		16.22							16.6		17.41	17.47									17.2				17.38				16.79					17.79		16.45											16.78	16.97
1/O60282												16.11											16.32				16.95																				16.17		16.87
1/O60287	15.74	15.97									15.58												15.89								15.99
1/O60291
1/O60292		16.45				17.54									16.49										18.62																				18.36				17.35
1/O60294				15.91																																				15.88
1/O60306		16.1						15.4	15.04	15.36							15.73					15.68			15.48					15.4							15.39							15.57	15.37			16.17
1/O60307
1/O60308
1/O60313		16.48			15.21			15.67		17.37		16.69		17.01		16.84			17.02	15.63		16.97		16.37	14.85				16.57	17.18		14.68	15.83	14.8		16.07	16.83			14.92	14.55	17	14.5	15.1	14.67	16.05		16.89
1/O60318
1/O60331					16.24
1/O60333																																						16.43
1/O60341																								16.05
1/O60343	16.96									16.88												18.36	18.49						16.36	17.85					16.54		16.25												17.28
1/O60346												15.71																			15.61
1/O60437	14.43	14.83			14.61					14.66				14.07	15.17	14.55		14.38	14.58									14.82		14.58							14.29						14.29	14.94		14.65	13.95	14.74	14.4
1/O60443																				14.46
1/O60447							16.11				15.2
1/O60449		19.27								20.31					16.18										20.27		15.65																				21.36
1/O60462											16.12					15.33
1/O60486
1/O60488			15.87		14.86	15.33	15.43	17.22							16.21			15.57		18.13		16.07	15.59	17.32	14.97		16.68		18	15.14	16.43		16.56	16.62		16.63	15.4		16.59	17		16.78			15.52	15.59
1/O60493	16.35	16.64	16.51	16.69	17.27	16.02	16.74	16.33	17.43	16.36	16.43	15.9	16.35	16.23	16.06	16.85	16.14	16.93	15.97	17.49	16.24	16.42	16.18	16.71	16.03	16.2	16.94	16.36	16.16	16.33	16.57	16.33	16.95	16.27	16.11	17.19	16.61	16.14	17.04	16.27	16.92	16.27	15.99	16.2	16.65	18.3	15.81	16.86	16.17
1/O60494	15.84				14.63	17.21						15.97					16.63				16.95								16.39		17.32		16.4						16.11					16.54			16.22	15.64	16.06
1/O60496
1/O60499
1/O60502									14.5						13.91														13.67							13.84	13.64									14.13		13.96
1/O60504																	15.67	16.06		16.4												16.07	15.78					16.2
1/O60506	17.07	16.69	17.33	18.35	18.3	17.35	17.58	17.38	17.3	16.61	17.86	15.9	16.22	16.49	17.44	16.87	16.78	17.55	16.73	17.56	16.1	16.87	16.38	17.58	16.16	16.32	17.15	16.15	17.34	16.64	16.69	17.47	17.66	16.52	16.14	17.84	16.64	16.99	17.63	16.96	16.65	16.57	16.46	16.52	17.58	17.79	16.47	16.8	16.43
1/O60508			16.25																15.7			15.99							16.21
1/O60513							14.68
1/O60518					16.28
1/O60547				15.96		17.17	19.2				18.09		15.47		16.86		16.13	15.64		16.63				16.19		15.32	16.19							15.71		17.74				16.47	15.89	15.81	15.25		18.03	15.78			15.05
1/O60551					14.96																																								14.38	14.72
1/O60566																					17.02												16.2						16.3
1/O60568		14.23	15.39	15.11	15.08	15.95	15.17	15.44			16.22				15.91			15.24		15.48	15.07	14.44		16.12			14.88			14.49	15.2	15.94	15.05	15.59		16.05	14.48	15.27		15.74	14.94	15.78			15.59	14.78
1/O60573																																																18.57
1/O60603																										15.38
1/O60610	15.45	15.37	15.8	16.14	16.23	15.29	15.63	15.65	15.89	15.34	15.64	15.59	15.88	15.95	15.61	15.61	15.31		15.41	15.89		15.44	15.31	15.18	15.48	15.49	16.48	15.28	15.59	15.3			15.43	15.34	15.8	15.6	15.58			15.1		15.18	15.88	15.67	15.7	15.49	15.47	15.53	15.53
1/O60613	16.18						15.88				16.16					15.86																					15.93					16.48
1/O60635						15.54					16.29																		15.6
1/O60637		17.92	18.45	19.08			17.76			18.52						18.15						17.51							17.92	17.96	20.02						18.93		18.47								17.92
1/O60645	15.99	15.67							15.72		16.3
1/O60656	14.92	15.29		17.85	15.29					15.21		15.77	15.12	16.4		15.6	14.94		15.94			15.08	16.77			15.8	15.77	16.22		15.25					16.29					16.42		15.34		16.07	14.55	14.43	16.7	14.97	16.62
1/O60664					16.06	15.38	15.67		16.26	14.86	15.52				16.22		15.06	16.12													16.06	16.27	15.37					15.51	15.61		15.65	15.24						15.52
1/O60678							16.94					15.48		15.53		15.73															16.29				15.63								15.46
1/O60684																															16.52				16.1				16.18					16.25		16.38
1/O60687						16.02					16				15.44																	15.85													16
1/O60701	16.14	16.76	16.24	18.28	16.94	15.13	16.48	16.57	15.96	16.29	15.68	16.41	17.32	16.81	15.16	16.24	16.95	16.3	16.73	16.06	14.78	16.35	16.86	16.51	16.51	16.86	18.3	16.98	16.92	16.24		15.23	16.8	17.79	17.21	17.24	16.63	15.24	16.8	17.76	15.62	17.83	17.28	17.12	17.67	16.2	16.96	17.18	16.96
1/O60704																																																14.87
1/O60711								14.48	16.6																						14.61		15.2						15.32		14.4				15.26
1/O60716	15.67	15.39	15.14	15.87	15.61	16.22	16.67	15.71	15.19	15.55	17.63	15.28	15.15	15.72	16.56	16.03	15.82	15.43	15.58	16.33	14.49	15.41	15.49	16.34	15.55	15.61	15.61	15.46	15.19	15.48	15.18	15.82	14.62	15.1	15.42	17.06	15.94	15.19	14.6	14.96	15.41	14.89	15.63	15.15	15.43	16.05	15.65	15.81	15.74
1/O60732									15.86		14.87																												15.34
1/O60749				14.46	14.67				15.95			15.17				14.81		14.97		15.04	15.07				14.77		15.62						15.02			14.41			14.75						14.67
1/O60762	15.61	16.45		17.42	17.23		17.27	16.38	17.38	16.09	17.08	16.3	16.38	16.52	17.04	16.14		16.95		17.34	16.08	16.03		16.4	16	15.95	17.08			16.01			17.08	16.53	16.09	17.16	16.1	16.5				16.09	15.99			16.73			16.48
1/O60763	15.93	16.39	17.96	17.68	17.29	16.02	17.28	17.47	16.36	16.48	16.77	16.44	16.59	16.77	17.23	16.85	16.08	17.6	16.51	17.49	15.43	16.2	16.08	16.99	16.44	16.5	16.73	16.35	16.59	16.34	16.28	17.05	16.36	16.83	16.86	17.71	16.69	16.07	16.22	16.66	15.97	16.63	16.97	16.41	16.64	16.74	16.36	16.96	16.71
1/O60783				14.92																				14.94
1/O60784	14.76	15.11		15.91		15.12		15.05	15.27			14.65	15	15.01	16.09	15.37	14.61	15.38	14.8	15.82			15.11	15.91	14.65		15.49	15.25	14.63		15.17	15.18			15.04	15.67	14.63	15.23	14.87			14.73	15.02	15.12	15.23	16.02	14.95	15.28	14.86
1/O60825																															15.62		16.22			15.28		15.75	15.92		15.94					16.49
1/O60826																											16.25			15.45				15.23		16.65				15.38		15.3
1/O60828						16.77	17.19	15.89				15.98	15.41			16.31	16.61		16.21		16.63			15.88	15.94	15.95		15.7			17.22		15.95					17.99						16.17			16.08
1/O60831			16.46			16.25	16.24				15.81									16.16	16.46										16.3									15.51	16.35					16.25
1/O60832			14.45	14.41	15.3	15.54		15.33	15.52	14.27	15.67				15.92			15.51	14.21	15.51	14.54			15.54			15.18	14.53	14.63		14.61	15.03	15.14		14.3	15.56			15.04	14.68					15.13	15.71		14.87	14.48
1/O60841	18.38	18.33		18.7	21.15	19.22		17.95	17.08	18.08	19.79	16.76				17.93	16.93		17.7		17.29			17.95			18.13			17.53			17.63	17.86			18.24	18.25	17.92			18.46			18.69			18.24
1/O60844		14.67																											14.69
1/O60858				15.95
1/O60869		14.97			15.88								15.15	14.9	15.4				14.87	15.87		14.95		15.05			15.94		15.26	14.89			15.02	14.71	15.33	15.41	14.98							14.96	15.73	15.34			14.54
1/O60870
1/O60879			15.44	18.93	18.13		18.18			17.81	17.99	17.78	17.82		17.88		17.37			17.59	17	17.82		17.54	17.3	18.02	17.17		17.09	17.58		17.25	18.13	17.89	18.3	17.71	17.55			17.42	17.9	17.89	17.68	17.1	18.85	18.25	17.54	17.86
1/O60884		14.67	15.68		15.64				15.35				15.3	14.28	14.87	15.4		15.29				14.81			14.89	14.87			15.28			15.1					15.06			14.59		14.74	15.5			15.52		14.99	14.97
1/O60885			15.66																	15.73
1/O60888	16.62	16.74	18.07	18.35	18.78	16.32	14.92	16.7	17.51	17.19	16.23	15.84	16.34	16.45	16.99	16.16	16.64	17.19	16.34	17.91	16.23	17.1	16.67	17.58	15.45	16.98	18.94	16.57	17.14	16.74	17.04	16.61	16.84	16.9	16.57	18.43	16.34	16.08	16.66	16.78	16.99	16.88	17.44	16.36	18.61	18.26	16.19	16.79	16.51
1/O60921						16.23
1/O60925			15.83	16.21	16.5				16.13						16.48			16.4									15.89					15.77	16.08			16.07		15.59	15.96						15.79	16.32
1/O60930
1/O60934																																							16.63
1/O60936
1/O60942				17.89																				18.77						17.98			19.55
1/O75015																																														16.61
1/O75027				16.26	16.14																						16		15.86																	16.58
1/O75037									17.03															16.44					15.1
1/O75044			17.38	17.34	17.48	16.41		16.33			16.38				17.14			16.7				16.24		16.98			16.36		16.56	16.64		16.62	17			17.17	16.11	15.85	16.95				15.91		16.87	17.28			15.86
1/O75054															13.86
1/O75063				15.52				15.24																			15.33		15.31
1/O75083	17.03	17.7	16.89	18.01	17.35	18.3	18.58	17.81	19.39	17.34	18.55	17.1	17.4	17.35	18.34	17.38	18.13	18.88	17.24	18.67	18	17.36	17.46	17.82	17.43	17.31	18.37	17.61	17.81	17.51	18.4	18.68	19.2	17.67	17.2	18.24	17.79	18.42	19.22	17.72	18.62	17.66	17.13	17.53	18.73	17.92	17.22	18.12	17.17
1/O75110			15.01					14.76	15.67					14.8	14.74					15.52							14.9				15.16
1/O75112
1/O75113																										15.56
1/O75116					14.77	14.39					14.68				14.31					15.16	14.56										14.78					14.93			14.4		14.51					15.31
1/O75122						16.44								16.51		15.78		16.49	16.23		16.36		16.48										18.22						18.26
1/O75127																																					15.69
1/O75131		15.9	17.11	16.33	16.95	15.93	16.45	15.59	15.35	16.05	16.36	15.97	16.12	16.34	16.65	16.47	15.78		16.45	16.69	15.63	16.03	15.74	16.22	15.97		16.19		15.89	16.2	16.06		15.6	15.76	16.05	16.03	15.74	16.34	15.78	16.11	15.99	16.01		15.93	15.78	17.24	15.85	16.14	16.26
1/O75146				14.61														14.93														15.01
1/O75147																				16.53				16												15.51
1/O75150								17.12												17.47
1/O75152	19.36	18.99	17.12	20.58	16.85		20.09		17.71	19.47	17.68	16.11	18.72	18.42	16.59			18.18	18.33	18.14		19.02		17.98	18.47	18.43			18.25	19.28	18.95	17.68		17.35	17.91	17.57	18.88		18.1					18.21	17.64	18.38	18.62	19.34	19.15
1/O75153		15.29		15.73	15.06	16.4						14.72	14.42	14.71		14.97				14.71						14.4								14.7	14.53				16.66	15.07	16.84	14.74		14.84		15.44
1/O75155																		14.49
1/O75157								14.96							15.39																		16.11							16.47
1/O75164										16.29						15.95						15.88						16.76
1/O75165							14.9			19.76	19.3																				19.19	21.32			18.43	15.78
1/O75170		14.65	17.4	15.17	14.52		16.13	16.48	16.69	16.95	16.77	16.99		14.75		14.53		16.84	16.99	15.35			14.69	14.78	16.4	16.35	14.65		15.01			17.05	16.09	16.53	17.08	14.93	14.38	16.32		14.36	15.6	16.3		14.76	16.21	15.1		15.04	14.91
1/O75175
1/O75179																					15.11
1/O75182
1/O75190																																																	13.79
1/O75191	16.32	15.93		16.95	16.82			16.23		16.54		16.56	16.75	16.84		16.37	16.71		16.4	17.79		16.54	16.48	16.93	16.87	16.14	16.35	16.68	16.25	16.58				16.27	16.77	16.63	16.22			16.1		16.3	16.57	16.79			16.53	15.95	16.46
1/O75204				15.94				15.85	17.37						15.92			15.98		16.22																												15.56
1/O75208	15.71	15.71	13.83	14.92	14.56	14.77	13.99	15.14	14.63	15.51	15.23	15.41	15.3	16.15	14.84	16	15.69	14.11	16.12	14.46		15.73	15.76	14.32	15.03	15.95	15.97	15.68	14.92	15.72	14.2	14.2	13.72	14.72	16.01	14.04	15.61	14.06	14	15.17	14.1	14.59	16.44	15.41		14.44	15.63	16.19	15.81
1/O75223					13.64													14.37		14.58							14.3									14.1										13.84
1/O75251			15.73	15.35			15.41			15.61		14.74				15.37			15.1	14.81				15.6	14.96		15.1				14.75	15.12			15.71		15.02						15.79		14.95	15.72		16.25
1/O75306		16.31	16.54	16.51	16.14	16.37		17.07		16.06	16.44	16.33		16.17	17.02	16.02	16.24		16.15	17.08	15.84	15.99	16.15		16.04	15.91	16.64		16.48	16.27	16.28		16.48				16.26		16.39					16.27	16.8	16.67	16.46	15.96	16.28
1/O75309																																									14.43
1/O75312			14.53	15.12	15.58										14.86					15.16
1/O75323						16.1	14.66		15.38		16.26							15.17									15.11			13.99	14.81	15.55	13.98				15.31		14.83	14.07	14.56				15.25	14.7			13.74
1/O75326
1/O75330														16.52					15.61																								16.46
1/O75340	15.24	15.42	17.11	15.66	17.11	15.89	14.95	15.58	15.9	15.37	15.97	15.35	14.95	15.19	15.77	15.27	15.53	16.7	15.17	15.82	15.71	15.45	15	15.12	15.21	14.87	16.15	15.53	15.41	15.34	15.97	15.86	15.47	15.26	15.38	16.13	15.32	15.26	15.34	15.33	15.87	15.48	15.62	15.23	15.91	16.02	15.26	15.48	15.2
1/O75342																															15.77
1/O75347		15.59	16.34	17.6	16.76	15		15.79	16.44		15.29	15.71	15.94	15.71	15.78	15.38	15.79	16.07	15.61	16.65			15.88	15.27		15.91	16.84	15.66	15.86		15	16.15	16.09	15.62	16.06	16.98	15.64	15.81	15.98	15.23	15.35	15.7	16.54	16.29	15.6	16.16	15.65	16.3	15.5
1/O75348	15.8		16.06	15.66	16.09	15.64	15.68		16.21	15.51	15.41		15.46	15.64	15.77	15.3	16.02	15.68	15.38	15.68	15.27	15.85	15.25	15.32		15.23	15.91	15.18	15.4	15.73	15.62	15.65	15.99	15.42		15.46	15.68		16.15		15.87	15.5	15.77	15.63	16.15	16.48		15.96
1/O75351	15.27	15.45	15.5	15.67	15.89	16.38	16.36	15.63	16.62	15.53	15.29		15.65	15.04	15.43	15.5	15.88	16.34		15.91	15.58	15.34				15.44	15.83		15.35	15.39	15.97	15.75	15.75	15.11	15.33	16.45	15.2		15.66	15.56	15.69	15.34		15.71	15.81	16.2	15.15	15.71	15.47
1/O75352	14.6	14.69		14.21		13.48				15.28		13.93		14.5	13.25	13.35	13.68		14.68	14.39		15.12	14.81			14.6		13.97	14.01	14.92							15.05		13.66	13.65	13.68		14	14.36	14.59		14.03	13.75	15.55
1/O75356	16.2	15.93	15.06	15.8	15.67			15.94		15.89	14.73	16.07	15.79	16.1	14.63	16.73	15.83		16.49	15.72		16.17	16.08	15.75	15.83	16.22	16.24	15.62	16.72	16.07	15.52			15.77	16.05	16.52	16.15	16.05		15.97		15.75	16.3	15.87			16.29	15.99	16.18
1/O75362
1/O75363												14.25
1/O75367	16.04	15.73	16.28	17.07	16.92	17.56	15.24	17.46	18.5	15.95	17.78	14.93	15.58	16.08	17.6	16.31	16.51	17.04	15.57	17.47	16.86	16	15.51	18.35	15.59	15.06	17.53	15.51	15.95	15.87	16.91	17.6	17.29	16.27	15.18	17.38	16.04	16.53	17.37	16.68	17.26	16.41	15.31	15.45	17.46	17.76	15.54	16.19	15.23
1/O75368					14.9	15.7	14.4	14.58	17.07		15.22		14.95	15.53	16.33	14.46	15.74	16.86	14.43	15.39	16.32		14.54	13.45	14.38	15.32	15.25	15.96	15.62		16.18	15.55	16.36	15.08	14.2	14.8	14.92	16.41	15.88	15.46	16.15	15.5	14.69	14.87	15.21		15.87
1/O75369	17.3	17.06	17.19	17.15	17.06	18.82	17.25	18.47	18.02	17.3	18.02	16.74	16.68	17.28	18.45	17.34	18.66	20.17	17.08	18.51	18.97	17.25	16.92	18.34	17.61	16.7	17.74	16.6	17.88	17.53	20.01	19.52	18.57	18.34	16.43	18.98	17.69	19.08	18.8	18.49	19.89	18.51	17.03	16.92	19.28	17.15	17.31	17.44	17.04
1/O75376				17.92			17.68						17.17								16.23	17.07								17.21
1/O75380	16.43	16.92	16.36		16.27			16.83	16.38		16.24		16.57	16.71	16.39		16.17		16.51			16.58	16.92	16.82		16.82	16.38	16.46	16.5	16.49							16.77						17	16.42			16.81	17.1	16.53
1/O75381		14.81														15.21																		15.29						15.33						16.11		15.54
1/O75382																																					15.02										13.48
1/O75385		15.55														15.58
1/O75390	15.9	16.7	16.94	17.62	16.72	17.3	17.3	16.97	16.04	16.4	17.46	16.15	16.07	16.8	17.43	16.4	16.52	17.11	16.66	17.15	16.18	16.53	16.3	16.28	16.54	16.09	16.42	15.96	16.17	16.45	16.29	17.24	16.61	15.96	16.57	16.66	16.74	16.2	16.72	16.7	16.43	16.45	16.46	16.49	17.92	17.47	16.27	16.9	16.36
1/O75391															15.64			14.6																						16.25
1/O75394				15.05
1/O75396	16.41	17.5	18.81	17.77	18.7	16.35	16.33	17.15	18	16.4	16.61	16.6	17.81	17.38	15.36	17.65	17.23		17.01	17.01	16.74		17.77	17.56	16.81	17.68	17.23	16.84	16.85	16.4	17.06	16.88	17.26	17.1	16.76	16.6	16.73	17.01	17.33	17.28	17.19	17.13	17.99	17.33	16.92	17.64	17.49	17.77	17.11
1/O75400				16.11					15.86		15.33				15.85					16.08				15.63			15.48		15.23				15.69			15.81						16.52			15.75	15.86
1/O75410															15.32																	15.06
1/O75419
1/O75420								16.14	17.62
1/O75427																																									16.16
1/O75431
1/O75436	16.35	16.43	17.37	16.64	17.29	16.58	16.97	16.12		16.29	16.58			16.41	17.55	16.05		16.41		16.95	16.03	16.32			16.09	15.92	16.9		16.6	16.5	16.63	17.04	16.99			16.19	16.53	16.48	16.92	16.62	16.56	15.96		16.2	17.02	17.96	15.88	16.37	16.32
1/O75438	15.66	15.81		15.53			14.71	16.15	17.2	15.32		15.34		15.75	16	15.8			15.21	15.37		15.34	15.67	15.14		15.66				15.43					14.86	15.49	15.65			16.75			15.62	15.25	16.64	15.85	15.77		15.74
1/O75439	15.17	15.71	15.16	16.75	15.33	15.45	15.42	16.18	14.65	15.35	15.54	15.65	14.98	15.62	15.12	15.33	15.23		15.14	15.81		15.4	15.63	15.25	15.04	15.34	15.38	15.46	15.52	15.13	14.73	14.56	14.93	15.31	15.27	15.18	15.77		15.2	15.86		15.38	15.22	15.52	15.54	15.5	15.57	16.12	15.43
1/O75446																										16.04
1/O75448																					16.39
1/O75475						16.38	16.59	17.05	16.17		16.57				17.16		15.91	16.14		17.06		16.05		17.45			16.78		17.13		16.23	16.27	16.32	16.3		16.59	16.15	16.21	16.63		15.79	16.09			16.67				16.17
1/O75477	16.31	15.9					15.56	15.15		15.96	14.93	15.43	16.01	15.99		16.14	16.17		16.08			16.05	15.95		15.43	16.03		16.08	15.54	16.08					15.78		16.29						15.77	15.77		14.96	15.78	15.94	16.21
1/O75487																15.1
1/O75489	16.5	16.87	16.9	16.47	16.56	16.27	16.08	17.13	16.14	16.27	16.28	16.2	15.62	16.65	16.55	16.71	16.3		16.4	16.27	15.79	16.37	16.91	16.47	15.93	16.27	16.6	15.87	16.51	16.45	15.98	16.13	16	15.72	16.29	16.43	16.58	15.91	15.98	16.22	16.02	15.73	16.66	16.33	16.3	17.22	16.62	16.68	16.77
1/O75494	15.55		16.84	16.5	16.68			16.46	16.89	15.69					16.59		15.33	16.15	15.81					16.77		15.16	16.91	15.62				16.12	16.11			17.03	15.44		16.25	15.66	15.14					17.12		15.92	15.91
1/O75506					14.57						14.37		14.22		14.69					14.92							14.65		14.44							14.68										14.87
1/O75521	17.72	17.88	18.61	18.57	18.21	15.09	14.74	17.65	16.43	17.85		17.27	17	18.4	15.84	18.25	16.68	15.27	17.71	17.34		17.93	18.03	18.07	16.51	17.88	17.78	17.84	17.61	17.93	16.61	15.52	15.95	16.88	18.11	16.66	17.58	15.45		17.03	15.47	16.92	18.34	17.55	16.28	16.3	17.95	18.19	18.12
1/O75525				14.78
1/O75529
1/O75530																		16.5
1/O75531	15.11	14.87	16.86	16.11	17.35	15.4	14.91	15.6	16.87	15.35	15.6	14.56	14.98	14.57	16.65	14.8	15.2	16.28	14.45	17.3	15.47	15.27	14.93	16.37	14.58		16.66	14.6	16.32	15.62	16.74	15.93	15.69	15.48	14.46	17.14	15.59	15.26	15.56	15.1	15.36	15.37	14.84	15.57	16.1	16.42	14.42	14.82	14.79
1/O75533	14.39	14.14	14.68	15.25	15.29	14.74	14.84	14.62	15.4	14.56	15.28	13.69	14.01	14.18	15.53	14.13	14.3	15.04	13.92	15.42	14.28	14.22	14.19	15.32	13.98	13.92	15.34	14.01	14.56	14.4	14.35	14.58	14.63	14.05	13.95	15.39	14.38	14.08	14.66	13.97	14.74	13.79	14.33	13.96	15.13	16.11	13.92	14.75	14.07
1/O75534			15.93	15.18	16.42	19.77		16.07		16.69		16.95		16.7	18.89		16.64	18.34	16.48		19.7				15.66	14.7						17.17	16.14	18.12						19.14	18.97	18.3			18.15
1/O75558								14.61
1/O75563
1/O75569												16.5							16.5			15.79				16.59									16.31
1/O75586																																																	14.62
1/O75592		16.25			16.3	16.79			17.69				16.35	16.11			16.56				16.35			16.45	15.61		17.38		16.38		17.53	17.5		16.69	15.84	16.88		17.76	16.99	16.55	16.93	16.56			17.19			16.34
1/O75594																											14.87																	15.25
1/O75600														14.5																																			14.69
1/O75607									16.3											15.76	16.79										17.15	16.75				15.9					17.2	16
1/O75608	16.14	16.54	16.48	17.17	17.03	16.28	16.01	17.33	17.24	16.4	17.09	16.27	16.73	16.38	17.46	15.92	16.47	17.15	16.38	17.22		16.48	16.32	16.3	16.06	16.38	18.61	16.71	16.85	16.54	15.51	16.16	17.39	15.74	16.62	16.86	16.12	15.58	17.43	15.57	15.72	15.95	16.85	16.63	16.64	16.09	16.31	16.56	16.32
1/O75616																																		19.56
1/O75629	16.9	16.33	15.18	16.24	15.52			15.59	15.95	16.89	15.17	16.07	16.39	15.77	16.53	15.78	15.86		15.99	16.18	15.26	16.72	16.18	15.96		15.97	16.27	16.45	16.68	16.87	16.06	14.96	16.28	16.07	15.82	17.97	15.96	16.32	16.04	15.58	15.97	15.73	16.43	16.29	16.16	15.67	16.01	16.18	16.28
1/O75636																																						17.57
1/O75643	14.18	14.09	15.2	15.47	15.29	14.32	14.4	15.1	15.27	14.3	14.49	13.82	13.24	14.29	15.22	14.08	14.54	15.15	14.19	15.7	14.42	14.11	13.94	15.55	14.12		14.83	13.86	14.36	14.43	14.47	14.62	14.71	13.84		15.27	14.48		14.69	14.25	14.3	13.72		13.97	14.91	15.91	14.26	14.4	14.18
1/O75648
1/O75663			15.9	16.65	16.23			15.16	15.7		16.18				16.1			15.82		16.4				15.88	15.35		16.04	15.5	15.79			15.58	15.82			15.96			15.3		15.31				16.09	15.72		15.59
1/O75665																																		16.8
1/O75674		14.42	14.91	14.92	14.92						14.23					14.62				14.75				14.94		14.44		14.72	14.88			14.99					14.31							14.63		14.49
1/O75676																								16.51																15.65
1/O75683	17.8																											17.39																				16.28
1/O75688	15.08																	15.68			14.88	15.38											15.74			15.8
1/O75689																	16.46
1/O75691		19.11												17.44			16.49																16.17				18.41									17.74
1/O75694				14.19	14.61	14.65	14.21	14.46	14.84		14.81				14.88		14.28	14.81		15.11	14.24			15.14			14.55					14.68	14.19			15.19			14.44		14.07				14.67	15.21		14.19
1/O75695	14.08	14.17	14.44	13.67	14.59	15.39	14.49	14.32	15.33	14.34	15.97		13.76	14.03	14.58	14.05	14.2	15.1	13.88	14.98	14.32	14.41	13.72	14.35	14.28	13.43	14.46	13.98	14.5	14.24	14.55	14.38	14.56	14.03		14.97	14.21	13.87	14.62	14.17	14.67	13.83		14.16	14.73	14.24	13.9	14.59	13.77
1/O75717	18.17	17.55											17.51			16.55						17.42						17.18		17.41																		17.37
1/O75718			15.07	15.31	15.2		14.19	14.93										15.61		15.19	15.44			14.96							15.25	15.95		14.25				14.87			15.54	14.75				15.81
1/O75746	16.82	16.74	15.84	16.61	15.66			16.56		17.35	15.63	16.16	16.9	16.71		16.89	16.15	15.72	17.17	16.61		17.5	16.7	17.43	16.22	16.48	17.15	17.08	16.73	16.74				16.43	16.91		17.34		15.59			16.16	17.45	16.68		16.52	16.72	16.93	16.99
1/O75764																					19				16.19															18.04
1/O75781			17.98
1/O75787						16.16	15.09				15.68							15.64														15.74				15.89			15.25						15.79
1/O75791
1/O75792	15.63							15.9					15.91	15.89			16.3	16.08		15.8		16.08			15.68					16.06							15.98		15.66						15.46
1/O75794																				15.03					14.23		14.59			15.07												14.59			14.6	14.54
1/O75795																																												16.88
1/O75808				16.56						16.31		16.32					15.82		16.25							16.6		16.3
1/O75817									16.16																														16.47
1/O75818	15.11	15.47																													15.64
1/O75821		14.91	15.51	15.3	15.82			14.55	14.81		14.52	14.29		14.5	14.79		14.56	14.47	14.63	15.81	14.65		14.51	15.47	14.88	13.89	15.06			14.13		14.2	15.05			14.46	14.27	14.5	14.92	14.98		14.76	14.79	14.64	15.2	15.74		14.44	14.65
1/O75822					15.76	15.03		15.65					15.52		15.46							14.77	14.64				15.83	14.81	15.31				15.45	15.13		16.63				15.43		15.08			15.65
1/O75828	17.05	17.22	15.79	17.13	16.64	15.64	16.65	17.06	16.81	17.39	15.95	17.44	17.84	17.38	17.11	17.24	17.89	16.2	17.07	16.41	15.3	17.27	17.65	16.34	17.64	17.95	18.14		17.8		16.17		16.33	18.54	17.36	17.12	16.59	15.78	16.15	18.17	15.88	18.07	17.63	17.73	16.4	16.37	17.19	17.51	17.25
1/O75832			16.42	15.05	16.37								14.49		14.7													14.47	15.03				14.88			14.73			14.64					14.89	15.07	15.08
1/O75843	17.98	17.53			16.56	16.85		17.38		17.9	17.18	17.36	17.99	18.25	17.3		16.95	16.39		17.38		17.78	17.84	17.49	17.22	17.8	17.29		17.4				16.38	17.04	18.06	16.84				17	15.75	17.1	18.25	17.49			17.89	17.74	18.62
1/O75844					15.4	14.43									15.08			15.08									14.93													14.53
1/O75865									17.02	15.89		15.56			16.71									16.49													16.52
1/O75874	18.78	16.55	17.14	19.32	17.79	17.53	16.66	18.86	16.21	16.62	17.43	16.97	16.98	16.27	16.99	16.05	16.93	15.83	16.13	16.48	16.23	16.49	16.72	15.95	16.65	18.61	17.3	17.22	16.16	16.48	17.84	17.97	17.18	16	17.07	16.92	16.14	17.24	17.11	15.69	17.88	18.05	16.93	17.16	19.44	17.22	16.29	16.81	16.48
1/O75879	13.59	15.09		15.58		14.99		14.84						14.84			14.53						15.48	15.37					15.43					14.41						14.9	14.83	14.67		15.54			14.78	15.25	15.03
1/O75880		16.2		16.72				15.97				15.96	16.44	16.29		16.74	15.56		16.04			16.34	16.22	16.23				16.27	16.1	16.27					16.36		16.54						15.85	16.15			15.82		16.3
1/O75881						16.7															16.84																		16.24
1/O75882																		15.56																					15.56						15.9
1/O75884			16.73		17.06	15.8			16.02	15.69	16.13	15.99			16.29	16.68		15.95	15.64	17.15				16.14	16.17		16.5		16.47							16.93								16.42			15.99
1/O75886	16.07	16.1			15.93						15.76	14.59	15.74	15.39	16.25		15.55		15.66		15.69		15.85		14.87		16.33		16.41		15.94						15.75	14.7	16.05	15.88		15.58	15.57	15.58		16.61	15.22	16.17	16.11
1/O75891	17.89	18.2	15.07	15.5	15.33		15.17	16.63	17.9	18.24	14.84	18.84	18.67	18.37	15.07	19.74	17.34	15.86	18.04	15.89		18.07	18.77	16.7	18.37	18.71	17.82	18.73	16.49	17.89	15.71		16.68	17.98	18.39	14.87	17.91	16.26	16.62	17.21	15.18	16.85	18.52	18.87	17.17	16.54	18.36	18.1	18.91
1/O75896		16.28								16.46		16.53	16.16									16.44			15.98																							16.66
1/O75909
1/O75911
1/O75915		15.45	15.65		15.8	16.32	15.76	16.14	16.41	15.26	16.04	15.49		15.58	15.39		15.26	14.97	15.5	16.12	16.06	15.52	15.89		15.33	15.39	16.11		14.84	15.17	16.5	15.83	16.87	15.51		15.4	15.36	16.23	16.81	16.72	16.63		15.4	15.7	16.88	15.41	15.39	15.22	15.72
1/O75923				16.05			15.85			15.24					15.1		14.72		14.84					15.75				15.2		15.14	15.26						14.68		14.8		15.07			15	15.35	17.59	15.28		15.92
1/O75925										16.29																16.55										16.14									16.14			16.16
1/O75934		16.57	16.51	15.72	16.32																			15.85																	16.91							16.22
1/O75935		15.27		14.89				15.07	14.92	14.58	14.62			14.9				15.12		15.2	14.9			14.98							15.14		15.31	14.96	14.62	15.2	14.74	15.3	15.4	14.91	14.93				15.26	15.73
1/O75936							16.48							15.88		16.33			15.81				16.02			16.02			15.75														15.95	16.24			16		16.03
1/O75937		16.14	16	16.75					16.56											16.61													16.38				16.08	15.75	16.42						16.46	17.1
1/O75940																																								16.44								17.48
1/O75943																											15.82
1/O75947	17.88	18.04	17.61	18.16	17.54	16.82	16.84	18.3	17.58	17.73	17.33	17.57	18.34	18.21	17.51	18.21	17.69	17.49	17.78	17.71	16.32	17.66	17.79	18.14	17.57	18.07	17.85	18.01	17.28	17.88	16.49	17.41	16.7	17.42	18	17.81	18.05	16.46	16.7	17.08	16.59	17.15	18.08	18	16.9	18.17	17.81	18.3	18.11
1/O75954																15.98							15.55
1/O75955	14.82	14.96		14.24	14.44	14.51	14.7	14.36	15.25	15.13	14.71	14.21	14.38	14.18	15.73	14.01	14.63	14.26	13.83	14.6	13.94	14.9	14.38	14.77	13.73	14.01	14.23	14.28	14.42	15.14	14.91	14.33	13.82	14.16	14.06	15.33	14.84	14.36	14.1	13.89	15.06		14.28	14.28	14.37	15.84	14.07	15.53	14.32
1/O75962																																	15.08						15.05		16.03
1/O75964	15.15	15.42	14.38	15.01	14.4	15.15	15.46	14.97	14.63	15.25	16.01	16.71		15.89	15.31	15.15		14.51	14.96	15.2		15.37	15.39	14.91	15.78	15.45	15.29	15.78	15.05	15.58		14.25	14.31	14.65	15.39	15.07	15.17	14.08	14.59	14.65	14.57		15.07	15.27	14.92	15.58	15.37	15.27	15.65
1/O75970					17.99				17.9		17.78							17.89							16.92			16.06			17.94		18.19								17.66	17.1
1/O75976					17.27	16.59	17.65		16.91		17.46				17.65						16			17.21	17.24					16.76		16.49		16.22	16.81		16.61		17.02	16.09		16.03	16.21
1/O75995
1/O76003	18.31	18.69			18.88	17.76	18.57	19.15		18.51	18.43		18.7	18.3	18.34		18.2	18.59				18.61	17.96	19.5				18.17	19.23	18.59		17.75	17.97		18.36		18.74	17.29	17.57	18.89		18.6	18.32	18.39				19.12	18.17
1/O76013
1/O76021			13.94	14.52	14.25	14.57	14.19	13.99	14.39		14.96		13.31		13.87			13.9		14.44				13.86			14.44			13.65		14.73				14.34		13.14	14.2							15.23		14.01
1/O76024	16.44			17.92									16.16													16.06																							16.1
1/O76027		13.91	13.32												14.2			14.23					13.55													13.27								13.88		14.19		14	13.61
1/O76031		16.34	16.23	16.62				16.15					16.56			16.14				15.76				15.9	16.22			16.12		16.33					16.58		16.12						16.55				16.3
1/O76038																													16.53	16.29														16.16
1/O76041						16.43															16.58
1/O76054	16.43	17.59	16.68	17	16.82		16.96	16.14	16.3	16.8		17.45	17.39	18.16		18.92	16.66		17.43	16.13		16.84	17.43	16.38	16.91	17.66	16.01	17.85	17.14	16.64				15.81	17.39	15.67	16.2			15.65		16.23	17.86	17.48	16.12	15.77	17.41	17.21	17.63
1/O76061																																																14.91
1/O76062	14.59	15.04		14.8				14.61		15.13		15.23		15.46		15.14			15.07	15.4		15.22	15.47		14.53		15.37			15.04				14.93	14.95					15.34		14.87	14.64	15.17		15.42	15.24	15.28	15.18
1/O76070																																													14.73
1/O76071						15.93	16.13		16.5						16.21					15.88	16.16								15.92				16.6						16.75			15.35
1/O76074	16.4												16.78									17.03	16.87
1/O76075																												15.13
1/O76094		14.66	14.84	15.13	15.16		15.16	14.92	14.71		15.52					14.6		14.84						14.51							14.26	14.38				14.93	14.78		14.99	14.78					14.91			14.73
1/O77932	16.79									16.63									16.35			17.01				16.39		16.35		16.8											15.62						16.07		15.59
1/O94760	15.64	16.54	17.15	17.78	18.5	15.08		15.37	15.99	16.08	15.75	16.56	16.69	16.79	15.05	15.82	16.48	17.11	16.01	16.58	14.61	16.12	16.93	16.69	15.68	16.67	17.12	16.94	16.23	15.93			15.06		17.16	15.81	15.87			15.86	14.82	16.34	16.96	16.8	15.97	16.15	16.43	16.22	16.25
1/O94761																											16.18
1/O94763																				16.29
1/O94766
1/O94776							16.07		16.29		15.86				16.37			15.89																	17.44
1/O94788										16.42													15.55														15.79
1/O94804			15.78						16.39		15.85	16.06					15.87			16.05	15.69		16.09	16.16			15.03	15.71		15.89	16.04		15.59		15.9	15.52										15.86
1/O94811																13.97
1/O94813																								18.34																					18.57
1/O94817			15.84	16.74					16.36												16.36																											16.01
1/O94819	15.01	15.29								15.39	15.5		15.03	15.44		15.37			15.23				15.09			15.15		15.47															15.34						15.59
1/O94822
1/O94826	15.77	15.43	15.47	16.57	15.55	16.02	16.65	15.89	15.08	15.78	16.63	15.22	15.34	15.85	15.96	16.32	15.27	14.84	15.64	16.23	13.85	15.83	15.7	16.12	15.64	15.47	16.46	15.28	15.68	15.7	14.38	15.04	14.96	15.24	15.76	15.38	15.74	14.21	14.65	15.32	14.47	15.05	15.4	15.47	15.23	16.02	15.33	15.34	15.68
1/O94827			16.54				16.01
1/O94829		15.88																		15.98				16.18							13.3	13.9					15.98							16.14
1/O94832	14.99	14.93				16.66	16.49	15.34	14.68	14.82	16.76		14.63	15.3	15.67	14.76	14.99	15.87	15.11	16.28	15.73	15.04		16.09	14.46	14.9	15.75	14.33	14.99	14.97	15.85	15.93	15.5	14.97	14.36	14.95	14.77	15.6	15.67	15.19	15.65	14.61			15.51	15.05	14.38	14.49
1/O94842																																										13.58
1/O94854										15.49									15.68									16.01																					15.49
1/O94855		15.62	15.3	15.4	15.01			15.21		15.21		15.16	15.22	15.4	15.2	15.26			15.12	15.54	15.17	15.25	15.44	15.7	14.72			15.24	15.9	15.5			15.2		15.31	15.14	15.04						15.19	15.12			14.9	15.8	15.43
1/O94874	16.06	16.17	16.89	16.28	16.56	15.81	15.99	16.13	16.19	16.44	15.79	15.95	16.38	16.19	16.17	16.44	16.08	16.06	16.39	16.04		16.62	15.9	16.15	15.93	15.92	16.4	16.21	15.92	16.04	15.83	16.31	16.04	15.93	16.29	16.54	16.45		16.12	16.23	16.1	16.11	16.8	15.78	16.28	16.98	15.79	16.47	16.29
1/O94875	17.12	16.79	17.46	16.84	17	15.65		16.6	15.71	16.85		16.07	15.81	16.38	16.15	16.98	16.24	19.04	16.63	16.67	15.3	16.75	16.4	17.32	15.98	16.32	15.78	16.45	16.12	16.83	16.68			16.05	16.33	15.6	16.77	16.15		15.15	16.52	15.72	16.41	16.67			16.54	16.84	16.6
1/O94880
1/O94885	17.79	17.2								18.12				18.37			17.79					17.86								17.27				18.17		16.7				17.57		18.13							17.74
1/O94886											15.94				16.81																					15.02										16.69
1/O94888				16.09
1/O94901
1/O94903	15.23	15.74			15.81		15.2		15.88	15.64		15.48	15.6	15.51		15.89	15.54		15.9	15.63		15.34	15.78	15.36	15.51	15.37	16.59	15.72	15.75	15.63	15.64			15.32	15.65	15.32	15.57					15.27	15.73	15.8		15.75		15.72	15.87
1/O94905	16.31	15.76	14.64	14.27	15.01	15.19	15.5	15.13	14.69	15.96	15.86	15.7	15.75	16	15.38	16.2	15.8	14.02	15.7	14.6	14.6	16.26	15.91	15.14	15.36	15.82	16.06	16.28	15.54	16.01	14.95	14.84		14.79	15.53	14.24	15.99	14.67	14.37	14.84	15.06	14.48	15.51	15.92	14.56	15.33	15.58	15.84	16.3
1/O94906		13.91	14.49		14.9		14.34		15.3						14.74									15.08			15.66		13.74	13.62						14.85										15.11
1/O94911
1/O94913
1/O94915					17.63	17.55		17.07					16.2		17.89						17.22		16.98				17.35		17.4	17.01			17.54	16.24		16.65					17.04					17.25
1/O94916
1/O94919												16.38												16.16					16.19								15.74							16.22		16.54
1/O94923
1/O94925						14.72	15.01	14.61	14.77		14.94				14.72			15.07		15.6				14.56			14.6					14.6	14.24	14.11					14.3	14.4		14.14				14.47
1/O94929					13.96								13.94
1/O94955														15.16									15.53			15.36																							15.22
1/O94964		15.91		15.76							17.21			15.86						15.67	14.8						16.18	15.49	15.76											15.29	15.26			15.61
1/O94966	16.49	16.58			17.09	17.3		16.28	17.81	16.01	16.63				16.94		16.77	17.64		16.9	17.04		16.12	16.55			16.92		16.85	16.54			17.9	16.32	15.88	16.66	16.11		17.92	16.67	17.69	16.63	16.27		16.72	16.64		16.71
1/O94967																					15.48												14.83
1/O94973	14.8	14.5	14.12	14.73	14.4		14.35	13.97	14.03	14.28	14.24	14.19	14.06	14.15	14.9	14.54	14.69	14.32	14.25	14.55	14.67	14.62	14.74	14.3		14.17	14.54	14.71	14.67		14.58	14.58	14.01	13.97	14.37	14.8	14.51	13.75	14.14	14.46	14.45		14.25	14.73	14.92	14.73	14.47	14.99	14.9
1/O94979	15.71	16.24	15.99	16.59	15.89	15.9	16.16	16.5	15.77	15.97	16.21	15.82	15.13	15.9	16.52	15.63	16.16	16.13	15.62	16.79	16.14	16.08	15.85	16.98	15.87	15.75	16.04	15.8	16.42	15.99	16.44	16.56	16.21	15.64	15.91	16.5	15.88	16.07	16.21	15.89	16.25	15.42	15.59	15.87	16.47	16.83	15.72	16.11	16.22
1/O94992				18.56																		18.08	18.24											18.13						18.64		18.08
1/O95049							15.45								14.85					14.83				15.32
1/O95057								16.02	17.01		16.26					15.74						15.75							16.06										16.77
1/O95059																																									14.9
1/O95067																	16.62
1/O95071	16.98	17.33	17	17.11	17.64	18.24	18.37	17.31	17.56	17	18.66	16.49	16.86	16.61	18.07		17.07	17.35	16.51	17.91		17.26	16.71	17.03	16.38	16.35	17.49	16.5	17.45	17.28		17.31	18.27	17.04	16.51	17.56	17.12		17.94			17.23	16.5	16.84		17.84	16.46	17.04	16.91
1/O95081	14.72		15.08	14.48			15.11			14.53				14.77	15.65	15.05		14.01		15.66		14.55				14.39			14.76	14.4		14.45					14.76	14.31			14.32				14.89	14.98	14.33	14.96	14.71
1/O95104
1/O95139	16.05	16.38		16.88	16.14			16.29	15.27					16.16	16.53	16.29				15.55			16.26	16.56		16.14		15.52	16.34	16.16							16.53						15.98	16.46	16.33	16.45	15.67	16.8	16.41
1/O95140				15.47																																										14.95		14.73
1/O95147												16.8
1/O95149				17.07																																	16.39
1/O95154	16.74	16.86	15.68	16.14	15.05	15.04	16.5	17.02	16.51	16.5	15.42	16.87	17.18	16.78	15.63	17.45	16.99	15.96	17.23	15.78	15.51	16.67	17.23	16.34	17.02	16.77	17.33	17.17	15.54	16.72	16.04		16.44	17.2	16.47	15.46	16.77	16.01	16.39	16.78	15.91	16.71	17.22	16.79	16.46	15.97	16.73	16.71	16.5
1/O95155																17.37	16.76						16.83				16.19	17.01	16.38														17.18
1/O95159					16.43												15.61	15.69																15.87		15.9												16.55
1/O95163																							17.95																									17.02	16.28
1/O95167																	18.16
1/O95168	16.62	17.07	16.39	15.63	16.09		16.01	17.34	16.24	16.34		16.49	16.08	16.86	16.75	16.66	16.25	15.5	16.3	16.27	16.17	16.38	16.73	16.87	15.96	16.5	16.41	16.24	16.47	16.55	16.22	16.04	16.25	15.61	16.44	16.4	16.64	16.04	16.42	16.06	16.31		17.05	16.6	16.59	17.07	16.9	17.27	16.86
1/O95169	16.3	16.69						16.77	16.48	16.25		16.27		16.37		16.45			16.31			16.31	16.35	16.91		16.34		16.15	16.28	16.51				16.18		16.49	16.45					15.88	16.79	16.23		16.29	16.72	17.03	16.63
1/O95171	15.45			15.4									16.06						15.14							15.49									15.17								15.36				15.22		15.53
1/O95178
1/O95182		16.06			15.77	14.29	15.22	16.16	16.17			15.37	16.01	15.81	15.75	15.47		15.31	15.53	15.31	15.17	15.77	15.98	16.19			15.62	15.69	16.16	15.79		15.26	15.3	14.98	15.72	15.89	15.92			14.99	15.3		15.87	15.9		15.99	16	16.13
1/O95197					17.22
1/O95202		15.13	15.39	16.16	15.29	15.37	15.41		15.02		15.33				15.34			16.56		15.26				15.97		14.44	15.55		15.58			15.58	15.19			14.84			15.26	14.87		14.87	15.12	14.93	15.14	15.4		15.09
1/O95210	15.67	15.61		15.15	14.23			15.79	15.21	16.06		15.52	15.54	15.2	14.18	15.78	15.45		15.57	14.98	15.57	15.98	15.81	14.37	15.15	15.79	15.28	15.4	16.01	15.67				15.13	15.72	14.69	15.9	14.86		15.13	14.34	14.69	15.51	15.74		15.25	15.39	15.11	14.7
1/O95218			15.87	15.74					16.17																										16.23	15.55
1/O95219			14.44	14.55	15.17	14.29	14.93				14.6				13.85					14.55													13.61												14.1	14.75		14.12
1/O95229																																			14.17												13.52
1/O95232								16.58		16.12		16.74			17	17.13	16.16		16.48					17.92									16.55	14.56			16.81					16.6		16.2	17.43
1/O95235							16.54				16.44																															17.08
1/O95236																																													15.02
1/O95239		15.35												15.53		15.29												15.57						14.81
1/O95248																																												15.16
1/O95249		18.16																								17.53		17.82															15.75
1/O95251																																																	16.03
1/O95255												13.96				14.26
1/O95271
1/O95273																	18.27
1/O95292		16.42	16.24	16.81	16.41	15.75		16.76	16.23	16.46	15.78	16.25	17.2	16.77		16.41	16.46	17.28	16.29	16.34	16.02	16.61	16.56	16.69	16.27	16.56	17.25	16.64	16.18		16	16.49		16.64	16.65	16.68	16.21			16.55	16.23	16.59	17.08	16.67		16.45	16.46	16.68	16.6
1/O95295			15.25	15.01					15.04				15.42		15.31															14.48																14.8
1/O95298								16.49																18.2										16.67	18.48					16.94			18.1		16.74
1/O95299	15.63	15.7	14.42	14.66	14.98	15	14.89	15.69	15.01	15.48	15.04	15.38	15.1	15.42	15.51	15.52	15.29		15.13	15.16	15.42	15.6	15.94	15.5	14.93	15.46	15.57	15.6	15.7	15.59	15.1	14.93	15.06	14.69	15.18	15.25	15.72	14.74	15.26	15.34	15.53	15.06	15.56	15.75	15.27	15.21	15.53	15.85	15.85
1/O95302				15.77		15.39	15.56											15.75		16.03											15.47	16.26						15.54			15.63
1/O95319	16.94	18.58	19.84		18.31		18.47			17.75	18.57		16.87	17.09			17.02	18.04			17.67	17.09		19.02	17.79	16.99		17.1	17.21	17.87		17.67				18.91	17.77	18.67	18.04		17.5	18.02			18.51		17.23	18.11	18.07
1/O95336	16.61	16.98	16.4	17.38	17.22	16.49	16.22	16.26	17.75	17.04	16.93	16.82	16.41	16.18	17.56	15.91	17.05	17.56	16.67	17.79	15.2	16.95	16.74	15.7	16.41	16.83	17.46	16.93	17.58	16.89	16.32	16.91	16.31	16.3	16.76	16.41	16.74	15.79	16.59	16.28	16.37	16.33	16.86	17.32	17.03	16.2	16.65	16.45	16.13
1/O95340		15.19		15.66				14.97		14.96	14.88	14.87	14.86	14.98		14.89	14.74		14.57			14.71	15.07	15.47	15.06	15.04	15.11	14.96	15.51	14.74	14.85			14.83	15.2	15	15.28		14.4	14.76	14.82		15.06	15.27		15.16	14.91	15.46	15.19
1/O95347																																															15.82		15.51
1/O95352							16.09				15.31				15.38												15.47						15.79			15.64			15.71						15.8	16.42
1/O95359																																																16.71
1/O95363				15.77
1/O95365
1/O95372		16.29		17.28				16.48	16.7	15.61								16.28		16.92			16.26	16.43	16.25	16.17		16.18				17.22				16.71		15.87		16.03				16.21	17.11	17.45		16.55
1/O95373			13.97	14.24	15.04		14.68	13.96		13.58	14.57				14.39					14.33							13.73	13.38	13.84					13.15	13.01	14.48			14.24						14.29			13.32
1/O95376													15.23																						15.84			16.85						15.53
1/O95379									16.27												13.98												14.48						14.76		15.09				14.71
1/O95382			16.09
1/O95394	15.29	15.64	15.54	16.32	16.31	14.68	15.92	15	14.97	15.46	15.16	15.28	15.82	15.28	15.93	15.98	15.58	15.27	15.3	15.93	14.4	15.45	16.08	14.96	15.46	15.74	15.43	15.81	16.65	15.43	15.18	14.67	15.41	15.07	15.81	16.11	15.41	14.6	15.2	14.98	15.14	14.93	15.65	15.61	16.33	15.61	15.35	15.6	15.42
1/O95395
1/O95396																																															16.21
1/O95400					14.33													14.6
1/O95402
1/O95425											16.23
1/O95433		15.2		15.39			15.04		15.37	14.89	15.44					14.83				15.94							15.69	14.73	15.47		15.16					15.51				14.9				14.89	15.18		14.45
1/O95436
1/O95445	16.01	15.97	17.13	16.11	16.41	16.01	18.49		16.9	16.64	17.73	16.07			16.86	15.38		16.95	16.28	17.65					15.62	16.23	16.03			16.37		17.01	16.1	16.03		17.24	16.5	16.4	16.18						17.07	17.17	16.09		15.02
1/O95447		18.61			18.55		19.61	19.64			19.35			18.13	19.76	18.51	19.28		17.58	19.94	19.85	18.65	17.88	20.28	18.41		19.43	18.18	18.83	18.73		20.49	20.23	19.43	17.85	20.22	19.02	19.81		19.19	20.38	19.61		18.12		19.7	17.78
1/O95453		17.03			18.39									17.32						19.15		17.48	16.68	18.84				17.7	16.92	16.83		17.55		17.39		18.97				17.61			17.66	17.42	18.2
1/O95456			15.48	15.18	15.63															15																						14.21			14.96	15.52
1/O95466							18.98										18.15									17.32										17.51
1/O95470															14.31												14.86																		14.79
1/O95476
1/O95477										15.51												15.45
1/O95478																					16.66												15.65												15.86
1/O95479	18.41	17.73	16.43	16.83	16.5	14.63	14.4	16.36	15.54	18	14.15	16.06	16.86	16.55	15.27	16.72	16.84	14.17	16.94	15.29	14.57	18	16.72	16.7	16.77	16.87	17.09	16.8	16.02	18.19	15.79	14.51	15.32	16.11	16.13	15.17	17.9	15.7	15.29	16.57	15.89	16.06	16.82	16.8	16.04	17.77	16.61	18.07	17.92
1/O95486	13.55	13.9	13.35	14.22	13.73			14.09		13.61	12.58			13.71	13.68	13.72	13.23		13.73	13.3		13.5	13.66	15.36	13.67	12.98	14.28	13.54	13.87	13.21		12.49	12.92		13.79	13.3	13.48	12.31			12.95		13.14	13.82	13.57	14.1	13.61	14.02	13.97
1/O95487	20.62	21.67	18.45		18.83	16.04	16.25	18.82	20.56	20.82					18.19	15.54	16.04				15.13	21.39		19.36			17.64				17.66	16.04	16.83	19.85	15.96	18.49	19.88	17.37	16.85	20.29	17.91	20.17			17.8	17.19
1/O95490	14.23
1/O95498
1/O95544			17.48		16.58				16.85			16.62			14.75			16.76		16.31				17.8	18		16.69									16.41			16.93			16.57			17.78
1/O95551																																				16.71
1/O95562
1/O95563	15.29	16.11						15.32		15.89		16.61		15.83	14.88	15.07				14.87		15.99		15.4	15.61		15.13	15.83	15.46	15.82					16.11	14.36	16.02			14.69					14.41	14.93	15.5		15.98
1/O95571	16.63	16.63	15.24	16.66	15.81	18.56	16.37	16.25	15.72	16.59	19.15	15.96	16.46	16.78	15.51	15.95	16.3	15.68	16.94	15.95	15.27	16.63	16.68	15.79	15.78	16.26	16.34	16.3	16.42	16.59	16.22	15.44	16.03	16.55	16.38	16.24	17.17	16.27	16.32	16.98	16.45	16.47	16.8	16.31	16.06	17.06	16.65	16.75	16.01
1/O95573		17.09				16.01	16.83	17.64					16.74		16.71		15.59	15.88	16.51	16.74			17.45	16.99		17.36	16.74	17.02		16.49		15.81	15.98	16.28	17.55	16.71			16.07	16.21		16.15			16.26	16.8		17.29	16.87
1/O95602	15.72			16.14				16.84			16.16		16.49						16.47	16.71				16.61					16.46					15.76	16.46	16.27						15.4	16.41			16.24		16.47	16.66
1/O95613			15.99	16.17	16.34	15.73		16.04	15.53	15.56	16.06		15.48	15.65	16.29	15.4		15.6				16.12		15.92	15.41						15.69	15.52	16.15	15.7	15.64	16.16	15.8	15.22	16.05	16.08		15.47		15.79	16.25		15.33
1/O95619					16.13		16.66								16.46			15.4			15.16													16.62												17.52
1/O95628				17.42	17.24			17.38		17.89			17.11										17.78	18.02					17.5	17.46					17.6		17.74						17.61	17.49			17.51
1/O95630						18.71	19.3							16.63	20.21	16.63		19.27	16.83	18.88	18.55		16.84	17.21			18.3		18.29	17.27		18.13	18.14	18.71		18.76	17.57			18.43		18.63		17.02	17.83
1/O95644																					17.49																					14.28
1/O95671		14.32						13.45		14.46	14.46	14.41	14.47	14.58		15.1			14.38	14.58		14.25	14.97	14.64			14.33	15	14.5	14.24	14.2				14.71		14.44						14.59	13.99	14.35		14.46	14.66	14.59
1/O95674	16.11	16.54																																15.63								15.68		16.59			15.57		16.12
1/O95678
1/O95684
1/O95685
1/O95696																																					14.92
1/O95707
1/O95714																																								18.56
1/O95716					12.29																														13.77
1/O95721				15.11																15.06				15.57																						15.4
1/O95747	14.75	15.26	14.99	15.05	15.92		15.93	14.65	15.86	14.89	15.01	14.59	14.91	15.14	14.58	15.37	14.43	14.68	14.8	15.22	14.55	14.99		14.6	14.77	14.51	15.18	14.94	14.77	14.95	14.72	15.25	15.25	14.53	15.06	15.6	14.62	14.62	15.3	15.68	15.1	15.04	15	15.35	14.78	14.97	14.87		14.97
1/O95749															15.29			13.93		14.38
1/O95757						18.26		16.45			17.6	15.69			17.18			16.47		16.11					17.05							16.76	18.05	16.22				17.8		18.69					19.09
1/O95758		14.42		15.38	15.64			14.59	15.68		14.14							14.63		15.75							15.21		14.65			15.33	15.06				14.45		14.71	14.47					14.97	15.35
1/O95777	16.36	17.03	16.71	18.49	18.82		16.11								16.98						16.48	16.57					17.91			16.33			17.7									16.64				18.11		16.93
1/O95782	14.65	15.72	15.59	15.64	15.97	16.15	15.65	15.86	15.12	15.83	15.74		15.16	15.11	16.34	15.18	15.35	15.7	15.33	16.5	16.3	15.71	15.36	15.98	15.55	14.62	15.77	14.62	15.97	15.39	16.53	15.24	16.19	14.92	14.73	15.67	15.67	16.11	16.27	15.93	16.5	14.94	15.09	15.32	16.3	15.95	15.26	15.41	15.38
1/O95785
1/O95786																																	14.08
1/O95793	13.68	13.8	13.38	14.46	14.59	13.73		14.01		13.75					14.23		13.54	13.74		14.64		13.57	13.51	14.55			14.18	14.07	13.9	13.71		13.56	13.83	13.94	13.92	14.79	13.15			13.6		14.03	13.77	13.78	13.71	15.1		14.09	13.38
1/O95801															16.77
1/O95810																													15.71					15.02										15.55			15.18
1/O95816			15.97	15.22	16.28			15.48												15.76				15.97			15.88						15.26			15.8									15.84				15.32
1/O95817																													16.17						14.12
1/O95819																				15.44						14.53																						14.75
1/O95822	14.67	15.11		14.02						14.88		14.5	14.88	14.78		14.98	14.52		14.79			15.08	14.84		14.43	14.45	14.68	14.84	14.58	15.23					15.28		14.39						14.91	14.83			14.71	15.22	14.86
1/O95825																					17.36
1/O95831	17.74	17.52	17.86	18.06	17.56	16.87	16.08	17.3	17.02	17.34	16.75	17.52	17.48	17.43	16.67	17.35	17.49	16.97	17.26	17.51	16.09	17.31	18.15	17.38	17.45	17.43	17.52	17.57	18.32	17.51	17.15	16.62	16.66	17.57	17.75	16.9	17.63	16.29	17.3	17.42	16.53	17.14	17.62	17.73	16.6	17.83	18.08	17.98	18.07
1/O95833																				15.63													16.31
1/O95834					16.2		15.34		16.33		16.05				17.42		15.68	16.16									15.68		15.73			15.41													15.68	16
1/O95848																																		15.28
1/O95857
1/O95861	15.47	15.68	16.26	15.71	17.09	15.37		16.2	16.77	15.69		15.75	15.71	15.41	17.04		15.24	16.37	15.49	17.57		15.73	15.74	16.07		15.88	17.09	16.04	16.28	15.5	14.92	15.62	15.52	15.81	16.05	16.55	15.32		15.47	15.43		15.55	15.54	15.7	16.4	15.95	15.38	15.69	15.2
1/O95864			15	13.95	15.62
1/O95865					16.8				16.64									16.92			15.8										15.93	15.98	15.98	18.64		16.67		16.29			15.92	16.13			16.63
1/O95866
1/O95870		19.63	18.6		18.91			18.11																						19.03			16.55	17.91										19.34		18.73
1/O95881	16.84	16.57	17.96	16.87	18.45		16.1	16.5	16.81	16.93	16.53	15.91	16.41	16.23	17.43	16.78	16.51	17.2	16.52	16.66		17.99	16.31	16.79	16.27	16.42	17.69	16.77	16.97	16.77	16.13	16.88	17.13	16.59	15.97	16.7	17.23	16.41	16.95		17.95	16.61	16.84	15.93	17.08	17.15	16.12	16.61	16.39
1/O95886																																				17.82						16.03
1/O95905																																						13.46
1/O95931		15.49			16.47										16.43		15.69					15.51														15.76
1/O95954	17.59	17.32					15.74	16.34	16.77	17.64		18.04	17.89	18.19	16.2	18.71	17.66	15.69	18.3	15.73		17.58	17.97	16.72	17.8	18.01	16.47	17.92	16.57	17.77	15.57		15.94	17.18	18.49	15.03	17.4	15.85	15.66	16.47		16.69	18.41	18.27	15.98	15.48	18.36	17.1	17.71
1/O95967						15.58															15.64											15.58	15.64					15.58	15.49	15.19	15.67				15.39
1/O95983															15.73														15.9						14.11	14.88						15.13		16.13
1/O95985																																									15.62
1/O95989																				15.66
1/O95994						15.6	16.56	15.11			16.16				17.22			14.74		15.89				15.39					15.49		15.75	16.91	15.14						15.3	15.52					15.99
1/O95999																																								14.94
1/O96000	14.54	14.49		14.54	14.6	14.23	15.08	14.43	14.13	14.61	14.44	15.72	13.77	15	14.37	14.83		13.87	14.26	14.19		14.42	14.68	14.22	14.75	14.48	14.83	14.6	14.52	14.24	13.97	13.85	14.06		14.2	13.76	14.49	14.11	14.08				14.48	14.19	14.54		14.99	14.55	14.36
1/O96005		14.46		15.4	14.97			14.99						14.87		14.54											14.79							14.5	14.75	14.52				14.92		14.41				14.85		14.39
1/O96006					15.3	14.64									14.73					15.2		15.45		15.4																	14.88					15.8
1/O96007																													14.74														14.23
1/O96008		15.79	15.57	16.68	16.16	16.47	16.63	16.56	15.71	15.82	16.86				16.76	16.1		16.68	15.79	16.59		16.05		16.67			16.57	15.63	16.07	15.8		15.82	16.08	16.03		16.05	15.97		16.37	16.33		16.19	15.87		16	17.01	15.92	15.9	15.89
1/O96009																				15.65
1/O96011																		16.92														16.63	16.76							15.91
1/O96013				17.92						18.15				18.01					18.07									17.85									17.98						17.68
1/O96017							17.08										16.54															14.88
1/O96019			15.1	15.28	15.41	14.36									15.47			14.58		15.56	14.71												15.02			15.21					14.69				15.19	15.48
1/O96028					17.61	16.43																														17.42					17.05
1/P00156
1/P00167	20.65	20.92	20.51	20.8	16.79	15.7	17.81	20.38	18.65	20.7	15.76	20.05	20.41	20.62	16.43	20.93	19.95	16.82	20.16	18.9	15.59	20.72	20.91	18.22	19.8	20.68	20.01	20.75	19.08	20.62	17.61		16.45	19.91	19.82	19.4	20.55	17.58	16.24	19.82	17.54	19.64	20.8	20.16	16.48	19.37	20.7	21.01	20.7
1/P00325	19.19	18.85	16.2	20.48	16.53	17.08	16.69	18.54	19.07	19.49	15.89	21.45	19.45	19.29	17.55	18.82	19.87	17.24	19.54	18.48	16.66	19.61	22.92	19.03	18.7	21.4	17.22	20.44	19.86	19.52	18.42	16.89	16.06	19.58	18.93	17.05	20.9	18.08	16.74	19.94	18.28	19.38	21.4	20.01	17.23	16.91	21.81	19.02	19.7
1/P00326	19.23	18.87	16.19	20.47	16.54	16.1	15.78	18.55	19.09	19.53	15.92	21.52	19.43	19.3	17.6	18.84	19.87	16.09	19.56	18.51	16.67	19.65	23.03	19.04	18.68	21.42	17.26	20.48	19.87	19.52	18.43	15.5	16.13	19.61	18.94	17.05	20.95	18.08	16.55	19.96	18.32	19.38	21.44	19.98	17.24	16.96	21.84	19.05	19.69
1/P00338	15.25	16.44	16.24	15.69	16.61	16.47	17.08	15.5		16.15	16.62	15.65	15.75	16.36	17.33	15.33	16.48	16.78	16.12	16.21	15.89	16.18	15.69	15.51	15.93	15.2	15.93	15.79	16.67	16.34	15.98	16.82	16.75	15.52	16.18	15.75	16.66	16.16	17.05	16.42	16.05	15.84	15.43	16.19	17.62	15.86	15.58	16.14	16.1
1/P00352	18.2	18.39	18.17	18.12	18.74	16.3	16.46	17.82	17.58	18.47	16.45	18.49	17.55	18.75	17.4	17.63	18.59	16.58	18.54	17.64	16.36	18.51	19.18	17.17	17.51	18.8	19.1	17.38	18.42	18.48	17.7	16.16	17.94	17.79	17.82	17.69	18.12	18.56	17.78	18.78	17.54	17.45	18.96	18.84	18.19	16.44	18.9	17.39	18
1/P00367	19.14	18.54	16.78	17.54	16.92	16.29	16.69	18.62	17.82	18.59	16.63	19.05	18.39	19.49	16.86	19.28	18.62	17.29	19.15	17.95	15.95	18.58	19.5	17.49	18.32	19.28	17.4	17.93	17.5	18.53	17.89	15.32	17.89	18.27	18.01	17.65	18.39	17.18	17.92	17.94	16.55	17.67	19.29	18.96	16.8	17.68	19.93	18.69	19.2
1/P00374						15.19																																				15.67
1/P00387	16.25	16.36	15.31	15.59	15.84	16.39	16.47	16.38	15.75	16.22	15.96	15.77	14.79	16.11	16.82	16.08	16.18	15.42	16.35	16.84	16.46	16.37	15.97	16.68	15.9	15.44	16.43	15.58	15.99	16.46	16.67	16.11	16.52	15.84	15.75	15.91	16.33	15.86	16.4	16.74	16.43	15.79	15.69	16.15	16.75	16.56	16.06	16.39	16.16
1/P00390	16.38	16.84	17.62	17.12	17.43	16.96	17.12	16.64	16.95	16.99	17.13	16.76	16.11	17.41	20.13	15.82	16.68	15.61	16.71	17.11	16	17.05	16.66	15.65	16.02	16.32	17.61	15.87	16.59	16.79	16.93	18.35	18.03	15.99	16.38	16.22	16.67	16.86	18.11	17.14	16.95	16.24	16.75	16.6	17.21	16.42	16.36	16.76	16.54
1/P00403	15.9	14.96	14.88	15.7	15.53	15.55		15.56	15.32	15.83	15.57	14.65	15.76	15.11	15.3	16.16	14.83		15.22	15.54		15.82	15.15	15.94	15.31	15.41	15.19	16.15	15.9	15.97			15.29		15.84	14.74	15.02			14.95	15.2	15.06	15.67	15.91		15.47	15.4	15.76	15.68
1/P00439	17.85	18.14		15.11				16.78	14.57	18.33		17.83	16.23	18.07	15.96	17.53	16.81		18.23			18.18	18.33		17.04	17.65		17.11	17.51	18.02	14.76				16.63		17.49	14.86		15.26	15.03		17.92	17.32			18.14	17.41	17.81
1/P00441	17.12	16.79	16.23	17.3	16.03		15.84	15.99	16.8	16.93	15.15	16.31	17.86	16.45	16.49	16.48	16.99	16.59	16.94	16.6		16.98	17.63	16.51	16.22	18.02	17.06	16.55	17.38	16.67	16.09	16.04	15.89	17.28	17.13	16	16.88	15.4	16.44	16.46	14.9	16.49	18.43	17.66	15.75	16.22	17.16	16.59	17
1/P00450	16.4	16.88	17.82	16.47	17.8	17.15	18.28	15.87	15.93	16.45	18.1	15.37	15.96	15.7	19.54	15.5	16.18	15.99	15.76	15.82	17.66	16.38	15.93	16.63	15.78	15.94	16.36	15.59	16.9	16.38	17.6	16.37	16.13	16.54	15.3	16.33	16.69	16.97	16.2	16.22	17.34	16.61	15.6	16.21	17.4	16.28	15.56	17.08	16.2
1/P00480	17.93	18.62	16.18		15.7			18.11	16.04	18.51		18.42	16.46	18.36	15.96	17.23	17.74		18.2	16.6			18.71	16.9	17.88	18.05	17.58	17.47	17.82	18.64	15.23		15.49	17.06	17.43	18.55	18.05	15.86	15.39	18.05	15.29	17.02	18.09	18.26	15.93		18.77	17.76	18.19
1/P00488	16.87					18.13	17.99	16.27		16.01	16.43		16.18	16.64		16.84	17.08		16.85		17.72		16.92		16.51	16.32		16.67	17.22	15.92	17.96		17.13		16.43	16.35		18.95	16.92		18.19		16.63	17			16.79		16.54
1/P00491	16.64	16.26	16.77	17.8	17.67	16.28	16.01	16.03	16.76	16.86	16.25	16.45	16.1	16.76	17.95	16.06	16.48	16.17	16.67	16.84	15.56	16.82	16.89		15.34	17.1	16.08	17.05	16.25	16.76	16.53	15.99	16.6	15.88	16.89	15.8	15.83	16.29	16.68	16.01	16.49	15.8	17.2	17.12	17.11	15.64	16.52	16.35	16.3
1/P00492	15.27	14.9	17.45	17.16	17.94	15.58	14.82	14.85	15.92	16.04	15.96	14.63	14.95	14.9	16.24	13.78	15.88	15.83	15.29	15.98	14.51	15.87	14.78	15.55		15.11	15.39	15.11	16.14	15.77	14.99	14.94	15.61	14.93	14.62	15.16	15.66	14.76	15.77	15.18	14.95	14.9	15.29	14.9	15.62	15.28	14.69	14.83	15.21
1/P00505	19.39	19.65	18.04	18.76	17.83	17.28	17.07	19	18.37	19.29	17.32	19.57	18.99	19.24	17.09	18.48	19.11	17.87	19.59	18.45	16.46	19.4	19.31	17.57	18.68	19	19.19	19.07	18.68	19.34	18.03	16.63	17.95	18.78	19.63	17.4	19.22	17.75	17.99	18.77	17.06	18.19	19.54	19.1	17.46	17.85	19.12	19.67	19.82
1/P00519
1/P00533		14.36													13.72	13.1			14.09				14.08	14.54								13.72			13.54									14.17		13.92		14.14	13.95
1/P00540	25.13	25.44	24.87	24.98	25.69	25.18	16.59	25.12	24.85	24.8	24.94		25.18	24.59	25.49	24.9	24.77	24.84		25.11	25.13		16.05	25.04		23.74	25.69	24.97	25.1		24.35	25.07	25.45	24.93	24.19	25.03	25.22		25.69	25.69	25.03	25.08	24.48	24.66	24.83	25.5	24.19	25.69	25.18
1/P00558	17.58	17.22	17.18	18.1	17.88	17.85	18.34	16.75	18.99	17.7	18.93	16.81	17.95	17.2	18.46	17.77	17.45	18.28	16.88	17.83	15.25	17.47	16.85	16.84	16.82	17.25	18.42	17.15	18.72	17.06	17.84	18.94	17.54	17.58	17.03	17.89	17.16	16.64	17.64	16.85	17.6	17.74	17.63	17.27	19.17	17.65	17.08	17.54	16.54
1/P00568	16.22	17.19	17.2	17.86	17.43	16.29	17.7	16.43		16.63	15.92	16.55	17.16	16.62	16.23	17.02	16.44	16.73	16.45	16.35	16.45	16.66	16.69	16.8	16.6	16.67	16.69	16.75	16.49	16.73	16.7		16.33		17.31	16.49	16.37	16.88	16.35		16.59	16.14	16.83	17.15	17.44	16.9	16.5	17.16	16.45
1/P00734			16.36	15.25	15.56		16.13	15.34			15.51					15.37	14.99			15.89				16.78	15.54		15.9		14.98		15.03			15.51		15.75						15.45			15.63				15.29
1/P00736		15.85	15.55				16.11	15.63		15.42	17.33				17.22			15.87		15.83	16.22				15.7				15.69	15.63	16.45	15.14	15.67	15.47			15.58	15.32	15.87	15.79	16.51	15.48			16.13			15.99
1/P00738	18.79	20.22	17.53	17.99	17.38	16.89	19.09	17.52	17.8	18.6	17.06	17.35	20.34	18.11	16.67	18.18	17.91	16.24	18.4	17.64	18.9	18.64	18.12	17.34	17.46	18.45	17.91	18.43	20.19	18.63	18.74	18	17.26	18.8	17.86	18.85	18.77	18.97	17.38	18.4	18.92	18.74	19.14	18.23	16.97	18.44	18.11	19.53	19.55
1/P00739											15.27
1/P00740			16.79		16.76		16.43			16.25	17.55					16.22	15.86		15.42	16.69				16.08	16.24						16.91	16.84						17.01			17.03					14.83
1/P00742			16.17	15.92	15.93		16.99		16.14							15.08				16.59							16.6							15.79		16.33									15.83	15.73
1/P00746						14.64	14.34				15.22							14.14														13.46							13.8
1/P00747	16.2	16.18	17.29	15.82	16.78	17.42	19.59	16.39	15.75	16.13	20.08	15.93	15.67	15.96	15.81	16.24	16.05	16.28	16.22	16.41	16.82	15.76	16.02	17.53	16.91	15.76	16.19	15.44	15.57	15.97	16.79	17.03	15.96	16.34	15.32	15.82	15.92	15.7	16.21	16.7	16.6	17.05	16.07	15.71	17.61	15.75	16.16	16.19	16.87
1/P00748		15.55						14.99												15.4	15.27			15.12					14.99		15.4	14.59			14.92	15.27		15.06										15.56
1/P00749																																											16.37
1/P00751	15.62	16.66	16.43	15.76	15.98	17.85	17.13	16.78	15.95	15.72	16.39	15.64	15.79	15.54	18.55	15.79	15.98	17.54	15.48	16.38	17.95	15.68	15.4	17.49	16.17		15.77		16.08	15.51	18.21	17.39	17.71	16.68		16.11	15.89	17.79	17.73	16.66	17.92	16.6	15.44	15.77	17.84			16.76	15.5
1/P00813									14.56											14.42					15.16		14.09			14.95	14.23		14					13.37	13.88		13.97							13.72
1/P00846	15.35	16.47	15.99	15.95	15.8	15.9		16.18	14.93	15.68	16.04	15.74	15.29	17.08	15.75	16.31	15.6		16.29	15.88	15.26	15.86	16.43	15.46	15.5	15.97	16.13	16.1	15.56	15.98	15.67		15.47	14.93	15.97	15.63	16.32	15.44	15.19	15.7	15.8		15.95	15.96	15.67	16.31	16.33	15.79	16.28
1/P00915	16.66	15.78	15.54	15.17	16.45	17.34	18.2	15.75	15.87	16.63	16.33	16.76	16.71	16.12	17.07	17.86	16.45	15.77	16.01	15.19	16.8	16.47	16.45	15.77	15.6	16.56	15.66	15.88	17.04	16.61	17.78	18.22	16.39	15.72	16.35	16.24	15.43	18.96	16.34	16.2	17.79	16.46	16.4	17.2	16.01	14.96	16.21	15.03	16.03
1/P00918	16.86	16.62	16.05	15.88	16.03	15.6	16.49	16.37	16.16	17.16	15.51	17.55	17.68	17.46	16.06	19.09	17.14	15.71	17.15	15.96	15.2	17.03	17.44	16.42	17.15	17.92	17.28	17.77	17.57	17.1	15.78		15.67	17.36	17.78	15.62	16.5	16.86	15.75	17.07	15.62	17.38	17.76	17.61	15.86		17.13	16.49	17.3
1/P00966	19.5	18.65	17.12	17.66	17.02	16.02	17.06	17.56	18.02	19.46	16.65	18.93	19.79	18.84	17.35	19.11	18.37	17.83	18.72	17.22	16.48	19.22	19.98	17.64	18.17	19.96	17.52	19.55	17.37	19.29	17.44	16.3	17.61	18.78	18.71	16.86	18.57	17.91	18.57	17.51	16.65	17.12	20.17	19.08	17.05	18.09	19.71	17.93	18.9
1/P00973								14.89	15.54
1/P00995															16
1/P01008	16.94	17.19	17.52	17.41	17.62	16.74	17.05	17.45	16.41	16.89	16.99	17.25	16.64	17	15.83	17.19	16.2	15.76	16.83	16.91	15.81	16.94	17.06	17.09	17.26	17.32	18.87	16.9	17.46	17.1	16.04	15.54	15.25	15.72	16.55	16.12	16.72	15.1	15.27	16.49	15.86	16.29	17.28	16.64	15.57	16.06	16.65	17.35	17.25
1/P01009	17.1	17.57	17.76	16.39	17.66	18.61	19.58	18.04	17.22	17.4	19.17	16.92	16.88	16.3	20.46	15.88	16.54	19.46	16.95	19	18.62	17.65	16.63	17.1	17.51	16.85	17.87	16.26	18.29	17.55	18.84	18.87	18.34	18.82	15.79	19.06	17.56	18.4	18.4	18.77	18.49	18.89	17.03	16.67	18.73	16.51	16.05	17.42	16.72
1/P01011	15.1	16.6	16.61	15.85	16.03	17.69	19.92	16.96	16.01	15.23	17.62	15.62	15.58	15.93	17.17	15.64	15.17	17.91	15.57	15.83	17.22	15.17	15.57	16.1	16.24	15.51	15.51	14.95	16.54	15.35	16.32	17.36	17.05	17.18		17.72	16.56	15.66	17.26	17.75	16.54	17.28	15.22	15.72	15.99		14.99	16.46	15.44
1/P01019	15.17	15.96	17.22	15.81	17.01	15.63	15.14	15.53	15.02	15.39	15.13	15.56	16.09	16.04	18.29	15.31	15.49	15.9	15.36	18.2	15.09	15.35	15.4	16.76	15.63	15.39	16.79	15.56	16.2	15.45	15.69	15.87	15.45	16.21	15.74	17.66	15.28	15.26	15.48	16.35	14.77	16.49	15.84	15.55	16.05	15.67	15.15	15.58	15.5
1/P01023	17.05	16.41	16.24	15.94	16.16	17.19	17.16	16.77	15.72	16.63	17.13	15.94	16.67	16.57	17.68	16.49	17.94	15.74	16.23	18.84	17.56	16.71	16.44	17.14	17.93	15.79	16.53	16.29	17.06	16.77	17.29	16.56	16.87	16.5	16.28	15.67	16.52	16.91	16.97	16.84	17.23	16.81	16.4	16.25	17.29	16.63	16.56	16.61	16.53
1/P01024	18.35	18.16	20.11	17.95	19.66	17.54	17.96	17.41	16.87	17.97	17.44	16.99	17.32	17.75	19.78	17.78	16.97	16.94	17.61	18.36	17.96	18.11	17.34	18.17	17.36	17.02	18.47	17.02	18.44	17.94	18.39	18.12	16.78	17.2	17.05	17.76	17.59	17.78	16.73	17.85	18.24	17.3	17.68	17.38	17.92	16.93	17.38	18.19	17.71
1/P01031		15.18	15.92	14.89	15.1	16.15	17.33	15.59		15.07	17.36			15	18.34	15.09			14.98	15.48	15.89			15.8			15.44		15.54	15.16	16.08	16.01				15.45					15.91				16.25		14.66		15.07
1/P01033						17.99	18.32				19.1				16.81			17.31			15.92										16.1	15.73	17.13					16.34	17.05	15.73	16.11	15.56			16.29
1/P01034							17.91				16.99				15.98																					15.95
1/P01040			15.4	15.98	16.14				15.83			15.58			16.22					15.88	15.48		15.24			15.73			16.83		14.16					15.07							16.42		16.01	16.49
1/P01042	15.55	15.66	17.24	15.83	17.04	17.13	18.37	15.77	15.6	15.55	18.14	15.28	15.21	15.58	17.02	15.9	15.45	15.63	15.63	16.14	16.38	15.74	15.02	16.41	15.56	15.06	16.68		15.8	15.68	16.99	16.16	15.71	15.6	15.22	15.77	15.41	16.63	15.77	16.28	16.84	16.01		15.48	16.03	15.98	15.5	15.35	15.53
1/P01111																												15.4															15.61
1/P01112																							15.79										16.31
1/P01116									14.88
1/P01130											13.68
1/P01137																																15.6							14.62	14.52		13.82			14.61
1/P01266							15.95		16.45																							15.7
1/P01275
1/P01282										15.63
1/P01584																17.29						16.68	16.49	16.67	18.18
1/P01591						14.82																	13.92				14.49					13.82		15.14						15.15	14.73	15.55	13.77		14.37
1/P01602																																	15.59
1/P01621	18.47	17.43	18.71	16.75	17.92	20.29	18.2	17.47	17.58	18.55	20.69	16.77	16.59	16.82	18.39	17.08	17.83	17.63	17.13	17.34	19.36	18.62	17.56	18.07	17.24	16.84	18.25	16.86	17.24	18.56	19.13	19.77	20.14	18.52	16.62	17.17	16.79		20.16	18.82	19.32	18.5	16.83	17.07	18.67	16.37	17	17.55	16.92
1/P01714																						14.98
1/P01717		13.61	14.15		13.63		14.29			14.05	15.82				14.04						14.9	13.9	13.75							13.84	14.37		16.36	14.66				13.81	16.43	14.75		14.53
1/P01743			17.38
1/P01763
1/P01764	15.95	15.87	16.68		15.78	17.9	16.34	15.61		16.7	18.4			15.69	17.12	15.36	16.88	15.41	15.82	15.96	17.56	16.77	16.03	16.71	16.3	15.38	15.6			16.58	17.22	17.94	18.38	16.56		15.51	15.06	17.07	18.39	17.82	17.32	16.68		15.87	17.85	15.43
1/P01771			15.54		14.8	16.64				15.67	16.67				16.06						16.07	15.61		15.62								16.89	16.48	15.66				15.13	16.29	15.9	15.91	15.92			16.31
1/P01780																																15.51
1/P01781	16.65	16.67	16.78	15.65	16.74	18.24	16.18			16.97	18.87				16.94		16.48	15.64			17.6	16.95	15.84	16.8	16.51					16.93	17.5	17.72	18.1	16.9				17.05	18.18	17.99	17.35	17.12			17.61			15.87
1/P01833					17.19		19.72	16.65			18.23				18.23			19.55	17.47															16.32			16.73			16.35					17.82
1/P01834	18.86	18.43	20.39	17.91	19.02	21.44	20.13	19.03	17.99	20.11	22.11	18.21	17.23	16.67	20.32	17.55	18.54	18.45	18.2	19.33	20.25	20.09	18.67	18.93	18.64	17.21	18.98	16.63	18.66	19.23	20.72	20.27	21.16	19.75	16.49	17.84	20.18	19.85	21.76	20.86	20.75	19.65	18.16	17.96	20.44	16.82	18.44	17.96	17.63
1/P01857	19.97	19.38	20.94	19.17	20.34	21.42	22.23	19.36	20.11	20.35	22.25	19.99	19.14	18.26	20.16	18.14	19.98	19.43	18.97	19.9	20.98	20.41	19.1	20.44	20.26	18.54	20.31	18.27	18.51	20.29	20.62	21.86	22.03	21.38	18.46	18.93	20.93	20.28	22.11	21.58	20.76	21.05	18.81	19.3	21	19.01	18.74	19.18	18.16
1/P01859	18.34	16.94	19.63	17.56	18.26	21.25	18.69	18.96	17.52	18.67	20.69	18.13	17.13	17.87	19.83	17.94	17.11	18.86	17.73	18.01	20.07	18.48	17.59	20.22	16.94	17.25	17.07	17.78	18.64	18.28	19.84	20.75	19.77	18.64		17.06	17.26	19.04	20.08	19.22	20.12	18.87	17.45	17.19	19.74	15.66	17.96	17.12	17.5
1/P01860					15.69	15.57					17.03										16.01			16.07								16.27							15.71
1/P01861			15.42			16.9	15.82			15.61	16.77				16.14					15.81	15.82	15.45								15.42	15.85	16.25	16.34	15.57					16.36		15.94	15.67
1/P01871	15.72		14.24	14.33		17.1	18.06	14.53	14.5	15.91	19.56	13.9	15.2	14.88	16.08	15.28	15.99		14.86	15.72	17.35	16.08	15.26	15.54	15.81	14.46	16.15	14.56	14.75	16.01	16.83	15.96	18.29	15.74	14.49		15.37	16.35	18.39	15.87	16.99	15.76	14.97	15.1	16.33		14.78		14.92
1/P01876	17.12	16.86	18.65	16.41	17.62	18.46	17.12	16.47	16.14	17.74	18.93	15.91	16.62	16.21	17.7	16.21	17.87	16.36	16.34	16.42	18.11	17.6	17.14	16.87	17.61	16.3	16.41	15.54	17.97	17.34	17.64	18.32	18.65	17.53	16.05	16.4	16.12	17.13	18.79	18.15	17.72	17.58	16.89	16.43	18.24	15.48	16.77	16.67	15.82
1/P01877		14.73				15.04					15.89										16.34						14.73		15.51		15.34		15.54						15.6	15.81	15.89
1/P01880							14.51
1/P01891
1/P01892									16.88															15.7			15.48						15.83						16.02							15.74		16
1/P01903	17.32	17.09	17.05	16.04	17.46	17.36	15.93	18.24	18.81	17.38	16.88	15.77	16.92	16.11	18.83	16.44	17.57	17.77	16.4	17.51	17.54	16.99	16.35	16.04	16.36	16.38	17.96	15.88	17.14	17.39	17.67	17.78	18.7	18.08	16.08	17.41	16.82	18.13	18.71	17.85	17.9	18.04	16.92	16.53	19.3	17.89	16.04	17.88	15.85
1/P01909								13.8	15.55	13.46								13.19		13.81																									15.08
1/P01911
1/P02008	15.88	15.9	16.32	16.41		16.75	18.46	17.25	17.32	16.08			15.87	16.27	16.75	16.57	16.84		16.29	17.9	16.92		15.78	17.86	16.37		16.49	15.72	15.73		18.42	19.05	17.09	16.88	16.27	17.71	16.82	18.02	16.95		17.31	17.2	16.09		17.83	16.63	15.7	16.42
1/P02042	18.95	18.25	17.57	18.75	18.54	20.32	20.52	19.04	18.2	17.96	19.17	19.24	18.95	19.12	18.6	19.75	19.68	18.14	19.15	17.57	20.16	17.93	19.16	19.05	19.11	18.93	17.56	18.75	18.45	17.99	21.12	16.34	19.44	17.32	19.19	19.17	16.77	22.17	19.55	16.93	21	17.56	17.81	19.32	18.86	17.42	18.84	18.06	18.56
1/P02100																						16.55																										16.74
1/P02144								16.97											17.66										17.59						17.45	17.66
1/P02452	20.05	17.7	17.41		16.91	23.64	19.33	21.61	20.29	19.55	22.79	19.93	17.59	20.18	23.13	21.07	22.3	23.88	18.69	21	23.91	19.4	19.44	18.27	21.77	17.97	17.93	19.06	18.02	20.43	22.75	23.28	23.13	22.98	17.29	18.77	19.5	22.09	22.99	23.49	22.74	22.56	18.41	18.96	23.49	16.86	18.66	19.34	17.44
1/P02458
1/P02461						15.59		15.84							14.26					15.82	16.22				14.81									14.64		13.81				15.81	17.05				16.32
1/P02462	17.25	16.59	18.48	17.17	17	19.78	17.12	17.6	18.12	17.88	19.27	16.16	16.74	16.92	19.22	17.15	18.53	20.63	16.69	18.89	20	18.09	16.73	19.28	17.25	17.7	16.51	16.26	17.71	17.35	20.57	20.66	19.5	18.1	16.3	16.72	17.85	19.98	19.15	18.83	20.5	18.88	16.75	16.37	19.96	18.32	16.6	17.02	16.7
1/P02489																					16.78												16.46
1/P02511																						15.25
1/P02533			14.68	15.32	14.94				14.63		15.01		14.8			15.26		14.87	14.51	15.71	16		15.56	15.27	15.84							15.06		15.9		16.06	14.51			14.93		15.92		15.65	14.41	20.83	15.65	14.84	16.02
1/P02538																				15.73	15.59				15.76									15.15		17.08						15.56		15.93		19.33			16.77
1/P02545	16.76	16.27	17.48	18.03	17.29	16.66	16.32	17.37	16.84	16.53	16.43	15.82	16.32	16.28	17.34	16.45	16.98	18.07	16.07	18.53	17.34	16.45	16.23	18.37	16.25	16.31	18.75	16.16	16.84	16.89	17.89	17.7	17.19	17.24	15.76	18.82	17	16.44	17.32	16.48	17.14	16.8	16.35	16.35	17.28	18.42	16.46	16.45	16.53
1/P02549							16.16									15.35					14.91				15.37						15.68					15.7		16.65			15.58
1/P02647	16.1	16.72	16.6	15.71	17.13	19.61	19.94	17.74	17.86	16.6	20.44	17.36	16.61	16.43	16.42	16.83	17.49	18.35	17.13	18.35	18.29	16.28	17.29	17.61	16.54	17.29	17.89	16.18	16.99	16.18	18.68	19.61	17.72	17.6	15.89	17.61	17.21	17.81	17.81	17.59	18.52	18.04	17.57	17.36	18.15	16.55	17.26	16.45	16.76
1/P02649	15.71	16.04	17.83	18.61	18.3	16.23	18.6	17.57	15.66	16.23	17.08	16.06	15.82	16.28	16.15	15.72	16.16	15.37	15.48	17.81	15.82	15.85	16.06	17.78	15.75	15.88	18.97	16.68	16.89	15.77	16.61	14.92	16.22	17.75	15.82	17.18	16.22	15.65	16.17	17.93	16.02	18.3	15.98	16.5	17.79	17.87	15.28	16.09	16
1/P02652				16.38				14.66	16.6							17.1	16.48							16.32		17.44	15.98	17.74										15.61
1/P02654							16.55				16.55																15.88
1/P02655			16.64	15.9	16.34		16.1	16.91						15.68						16.28				16.08			17.12	15.8	16.04					15.98		15.67				15.82		15.81	15.98	15.76		16.14
1/P02656	15.41	15.43	18.28	16.83	17.66		16.13	15.71	15.39	15.56		15.73	15.99	16.51		16.35	15.3		15.34	16.65		15.55	15.55	16.3	15.74	16.03	17.24	16.43	16.74	15.69				15.7	16.63	15.64	15.53			15.63	14.94	16.1	16.44	15.74		15.68	15.47	15.73	16.11
1/P02671	17.88	18.08	23.12	18.96	21.23	18.99	20.87	18.03	16.16	17.81	20.29	16.82	16.95	17.57	21.28	17.68	17.31	17.81	17.56	18.04	19.35	17.85	16.82	18.38	20.72	16.33	17.07	15.89	18.55	17.51	19.02	18.45	17.47	17.26	16.49	16.93	17.71	18.64	17.69	17.84	18.97	17.16	16.53	16.93	18.7	17.02	16.77	18.18	18.38
1/P02675	16.24	17.08	21.71	18.01	20.13	17.68	20.94	17.25	15.54	16.48	19.31	16.02	16.18	16.23	20.13	16.37	16.38	17.33	16.55	16.81	18.61	16.34	15.89	18	20.05	15.57	16.61	15.62	16.76	16.1	17.84	17.71	16.74	16.57	15.29	16.32	16.71	17.44	16.67	17.31	17.93	16.78	15.68	15.98	17.45	16	15.91	17.07	17.03
1/P02679	15.49	15.47	21.14	16.85	19.09	16.05	19.54	15.96	14.67	15.45	17.83	14.56	15.84	15.57	18.62	15.41	15.35	16.58	15.08	15.31	16.24	15.51	15.13	16.61	18.04	14.89	15.35	14.7	15.73	14.66	16.32	16.7	15.21	15.77	14.47	14.9	15.26	15.96	15	15.66	16.39	15.81	15.47	15.11	15.74	15.17	14.68	16.1	16
1/P02686							16.73										15.35
1/P02730	15.72		15.52		15.23		19.71	16.3		15.53		16.9	15.58	15.99	14.85	17.88	16.77		15.93		18.16		16.27	16.54	18.01	15.47		15.86	16.28	15.35	18.56		16.33		15.7	16.37		19.77	16.25		18.73		15.93	16.36	16.32	15.67	15.99		16.59
1/P02741		16.03		15.58			15.77	15.38							21.46			14.94											16.99			16.28	15.97	16.34		15.15	15.64		16.12	16.25		16.07			15.5			16.04
1/P02743	16.63	17.13	16.46	17.15	15.82	19.17	17.16	16.51	15.86	16.98	18.73	16.75	16.24	18.59	17.29	17.23	18.7	17.49	16.29	16.42	20.04	17.06	16.78	17.14	16.41	15.61	16.51	16.08	17.08	16.99	19.76	15.91	17.73	16.7	15.55	15.54	16.85	18.21	17.82	19.2	19.86	16.67	15.93	17	16.84	16.51	16.48	17.15	16.76
1/P02745							19.79	18.89		17.19	20.42			16.82		16.64	17.91	18.02			19.15	17.92			18.13					17.63	18.43	18.29						18.32		19.07	18.68			17.87	19.39		17.4
1/P02746	14.75	15.02			15.12	15.74	16.24	14.92		14.98	18.01			15.01	14.71		15.54	14.97		15.46	15.92	15.03	14.99		15.26					15.12	16.11	15.9	15.05	14.96			14.35	14.96	15.5	15.09	15.96	15.31		14.86	17.16			15.4
1/P02747	14.68	15.14	14.47			16.35	17.32	15.1		14.95	18.81	14.04	14.41	14.43	15.18	14.62	15.78	14.77	14.45	15.05	16.41	15.11	14.72	14.89	15.86	13.78	14.07	13.92	13.88	15.22	16.51	16.96	16.12	14.65	13.96	14.16	14.57	15.85	16	15.45	16.57	14.65	14.11	14.54	18.33	14.43	14.67	15.23	14.45
1/P02748	15.3	15.57	14.78		14.88	18.14	20.32	14.76	14.72	14.84	20.13	14.61	14.84	15.71	16.26	16.87	15.48	15.58	15.03	15.15	16.44	15.24	14.76	15.67	15.44	14.21	15.05	14.83	15.18	15.09	17.5	15.52	16.81	15.47		15.41	15.78	15.65	17.05	15.54	17.57	15.58	14.56	15.02	16.35		14.62	15.75	15.05
1/P02749	16.22		16.54	16.12	16.15		17.36	16.54			16.92		16.06		16.82	16.25		16.64		17.17			15.8	17.87	16.11							17.34		16.33		16.29				17	16.51	16.1	15.67	15.94	16.81	15.98	15.85	15.81	17.02
1/P02750	15.57		15.8		15.41	16.25	17.41	15.78	16.22		16.08	15.93		15.94			16.62					15.97		17.73				16.49			17.07						16.96	16.54		16.08			15.94		16.49	15.67	15.53	15.92
1/P02751	16.62	16.51	18.48	17.31	18.13	18.35	18.65	18.04	16.51	16.5	19.21	16.05	15.69	15.91	17.27	16.44	16.76	17.85	15.96	18.94	18.13	16.54	16	18.22	17.31	15.32	16.4	15.74	16.91	16.68	18.74	21	18.38	18.07	15.44	17.18	17.41	18.01	18.17	18.71	18.88	18.16	15.82	15.88	19.56	18.51	15.64	16.81	16.79
1/P02753	17.09	17.06	17.75	17.2	17.85	16		16.86	16.66	16.86	16.52	16.46	17.02	16.66	16.52	16.8	16.45	16.32	16.3	17.09		16.67	16.82	17.23	16.44	16.88	18.45	16.56	17.41	16.42	16.18	15.8	16.33	18.06	16.85	17	16.59	16.24	16.33	17.48	16.06	18.04	17.4	16.72	16.28	17.4	16.68	17.64	17.26
1/P02760	14.73	14.94	15.61				15.11		15.51	14.9	14.84		14.92	14.65	16.74					15.87	15.18		14.83	15.28			16.28	15.01	15.57	14.92	15.95	15.43	15.01	14.58		15.99	14.61	15.35			15.25	14.67	15.33		15.96			14.98	14.8
1/P02763	16.12	17.43	17.99	16.06	17.08	16.91	19.13	15.92	16.59	16.41	19.53	15.75	17.14	15.9	19.74	16.26	15.83	16.56	16.93	16.27	16.59	16.39	16.22	15.1	15.41	16.19	15.96	15.58	17.14	16.49	16.95	17.01	16.63	16.04	16	16.3	17.81	16.88	16.82	15.61	16.88	16.31	16.71	16.6	16.49	16.19	16.04	17.7	16.62
1/P02765			16.86		16.36													16.59			17.01						15.58						15.75			16.19		16.78			16.7
1/P02766	16.12	15.9	16.97	16.36	16.25	17.39	17.48	16.5	15.83	16.23	18.56	15.87	16.89	16.07	15.95	16.16	15.75	17.33	16.43	16.84	15.5	16.27	16.64	16.08		16.73	16.85	16.26	16.46	16.21	16.08	17.44	16.27	17.16	16.36	16.22	15.37	15.39	16.18	16.83	15.91	16.91	17.23	16.19	16.22	15.83	16.21	15.95	16.69
1/P02768	17.57	17.92	19.54	17.55	18.97	20.08	18.78	18.25	19.49	17.77	19.23	18.79	18.06	17.72	19.25	17.78	18.04	19.86	18.84	19.83	19.74	17.69	18.07	18.06	19.07	18.08	18.82	17.39	18.86	17.47	19.73	20.87	19.97	19.11	17.5	17.62	17.3	20.08	19.99	19.43	19.82	19.27	18.13	18.48	19.05	16.74	17.64	17.16	17.49
1/P02774	16.06	16.72	16.98	16.59	16.69	17.08	18.59	16.37	16.24	16.39	18.3	16.27	16.07	16.39	19.77	16.18	15.97	16.79	16.2	17.07	16.48	16.31	16.46	16.17	15.92	16.55	16.14	16.37	16.24	16.39	16.18	16.8	16.72	16.64	16.28	16.9	16.16	16.77	16.27	16.66	16.14	16.71	16.1	16.43	16.27	16.85	16.22	16.62	16.09
1/P02775
1/P02786		17.6	17.7	17.83		17.41	17.93	17.6	17.36	17.08	18.37	16.97			18.04	16.34	16.62	17.14	16.89	18.7	17.36	17.15	17.11	17.26	16.95	16.85	17.14		17.93		16.72	16.84	17.84	16.41	17.13	17.29	17.16	17.05	17.69	17.79	16.61	16.22		17.43	18.54	19.12	17.22	17.12	17.28
1/P02787	17.91	17.78	18.8	17.83	18.93	18.06	18.75	17.43	17.85	17.49	17.88	17.42	18.14	17.56	17.82	18.26	17.7	18.58	17.94	18.23	18.17	17.63	17.79	17.66	17.53	17.65	17.21	17.09	17.9	17.2	18.67	18.26	17.94	18.1	17.05	17.39	17.24	18.59	17.97	17.65	18.45	18.49	17.58	17.89	17.64	17.56	18.33	17.68	17.61
1/P02788		15.14				14.53	18.53	13.59	14.66	14.21	15.6	13.81		14.45	17.58	13.51	14.27	13.8		15.95	16.18	14.3	13.84	13.88	13.75				15.44	14.78	16.51	14.04	15.1		13.51		14.52	16.46	14.82		16.44		13.47	14.2	16.36	13.58		14.65
1/P02790	16.85	17.24	18.47	16.9	17.69	17.87	18.38	16.78	17.29	17.12	18.21	17.02	17.15	16.62	18.42	16.52	16.77	18.13	16.98	17.93	17.69	17.03	16.65	17.51	17.1	16.68	17.56	16.16	17.72	17.03	17.91	19.36	17.33	17.11	16.89	17.46	17.5	17.91	17.31	17.06	17.78	17.28	17.02	17.01	16.69	17.29	16.63	17.24	17.32
1/P02792	23.47	21.44	19.6	18.39	19.64	19.64	18.79	20.15	19.99	17.5	20.89	20.33		21.7	20.35		21.1	18.29	22.2	19.55	18.63	23.88	22.17	18.91	17.87		19.9	22.88	19.87	23.87		18.72	22.38	20.91	19.98	18.03	19.26	21.84	22.43	20.91	21.68	20.56	23.24	20.64	21.98	17.51	22.25	21.34	21.19
1/P02794	19.43	19.5	17.69	17.36	18.13	19.33	17.06	17.79	18.53	20.63	20.02	18.57	19.44	19.45	20.1	17.78	18.81	17.18	20.35	19.76	17.53	20.7	19.75	17.9	16.7	19.7	18.07	20.6	18.46	20.56	19.21	17.27	20.17	18.03	18.56	17.11	17.39	20.41	20.26	19.31	19.18	18.07	20.51	19.33	20.16		19.81	18.21	18.94
1/P02795
1/P03886
1/P03915																																															15.63		15.19
1/P03928										15.74									15.58					15.62
1/P03950																		15.99														15.86													16.81
1/P03951		14.6																							14.98					14.76
1/P03952				15.38						15.51	16.14							16.47														16.12	16.52
1/P03956
1/P03973															15.1
1/P04003	15.51	16.41	16.48		16.05	15.94	19.22	15.76		15.86	18.77	15.58		16.09	17.63	15.1	15.37		15.78	16.22	16.94	16.04	15.65	18.95	16.94		16.05		16.65	16.14	16.17	15.6	16.02	15.86		15.78	16.15	15.68	15.99	16.77	16.28	16.22		16.27	16.04	17.01	15.71	16.05	15.79
1/P04004	17.96	17.95	21.1	17.51	19.5	19.92	21.48	19.44	16.65	18.31	21.94	17.96	16.54	19.42	20.78	18.46	19.31	17.6	17.15	20.78	20.36	18.45	17.34	19.62	19.22	16.72	19.36	17.42	18.09	18.48	20.37	18.45	20.48	18.89	16.59	19.15	17.39	19.06	20.69	20.63	20.3	18.64	16.57	17.79	21.69	17.17	16.97	17.89	17.72
1/P04040	19.38	20.23	19.72	19.51	19.82	16.62	16.81	19.53	18.71	19.45	16.8	20.63	20.46	20.75	16.16	20.38	19.39	15.78	19.96	18.6	16.68	19.52	20.98	18.3	18.89	20.81	19.7	20.7	19.53	19.37	17.82	15.5	17.34	18.1	21.22	18.73	18.87	18.43	17.4	17.97	17.77	18.08	21.37	20.59	17.3	18.84	20.77	20.4	20.01
1/P04049		16.59				18.87		17.14	17.16						17.71							16.87									18.06		17.91	17.99					18.04		18.43
1/P04054
1/P04062			15.88	16.28	15.85	15.77		15.96							17.94			15.79		15.73				15.79			15.45						15.18			16.2			14.97			14.79			15.78	17.6
1/P04066	15.45	15.48	14.82	15.56	15.41	15.32			15.26	15.57	15.13	15.19	15.37	15.16	15.72	14.97	15.38		15.45	15.02	15.18	15.36	15.5	15.91	14.8	15.1	15.03	15.52	15.67	15.65	15.38		14.72	14.82	15.13	15.84	15.59	15.03	14.78	14.92	15.29	15.23	15.28	15.32	15.46	15.9	15.25	15.64	15.35
1/P04070																				14.71							14.19
1/P04075	17.9	17.73	17.55	18.21	18.26	20.1	19.73	18.21	20.33	17.74	20.77	16.73	17.88	17.34	20.01	17.36	18.27	20.12	17.42	18.34	18.59	17.87	17.3	17.45	17.19	17.3	18.35	17.38	18.17	17.67	19.43	20.95	19.88	18.29	17.33	17.47	17.98	18.92	19.95	18.31	19.4	18.31	17.44	17.55	20.29	17.25	17.38	18.27	17.25
1/P04080	15.9	17.22	17.76	17.99	18.35	17.51	15.99	16.8	17.83	16.28	18.43	16.12	16.91	15.94	18.41	16.64	16.59	17.56	16.38	17.86	16.2	16.45	16.47	16.43	16.72	16.44	18.02	16.32	17.19	16.33	16.82	17.33	17.79	17.54	16.53	17.92	17.08	16.79	17.77	16.98	16.65	17.41	17.06	16.98	17.6	18.07	16.26	17.24	15.79
1/P04083	15.84	16.36	15.72		16.06	17.7	18.5	17.19	16.83	15.91	17.51	15.72	15.75	16.05	17.11	16.32	17.4	18	15.77	17.52	18.9	16.06	15.98	16.65	16.47	15.44	16.46	16.25	16.51	16.22	19.04	17.2	18.46	16.92	15.88	15.82	16.14	17.74	18.71	17.15	18.99	16.93	15.95	16.36	18.14	16.38	16.1	16.95	15.52
1/P04114	15.29	16.08	14.37	16.67	14.89	15.97	15.32	16.24	14.48	15.44	18.88	16.01	14.76	16.37		15.57	16.01	13.4	15.59	16.88	16.2	15.77	15.42	16.28	15.52	15.58	16.66	16.16	16.1	15.54	16.47		14.97	15.7	15.88	14.56	15.52	15.27	15.15	16.3	16.36	15.89	15.21	16.25	15.79	15.25	15.44	16.56	15.94
1/P04150
1/P04179	19.76	20.16	16.9	20.26	17.17	16.8	16.38	19.44	18.26	19.93	17.05	17.33	19.39	18.01	19.28	17.24	19.07	19.24	18.49	17.91	16.72	19.9	18.43	17.35	16.83	18.22	18.96	17.58	19.69	19.96	18.79	17.23	19.81	21.07	18.08	18.03	20.46	18.73	19.79	21.19	18.59	20.82	18.68	18.28	19.35	17.53	17.75	20.51	18.18
1/P04180																																											16.03				15.91
1/P04181	14.2					15.74	16.28			14.03	17.06	14.86	14.13	14.68		15.42		15.31	14.92	14.28	13.92		15.49			14.94		14.54	15.22		14.38		13.49		14.7					14.32	15	14.02	15.19				15.66		14.46
1/P04183						16.57		15.78			15.87	15.92		15.94		16.23	16.45		16.21		16.83		16			15.95		16.03	16.23		17.22		15.98		15.97			18.25	16.2				16.16	16.45			16.27
1/P04196	15.5	15.6				17.25		16.93	17.06	16.71	18.24	15.49	15.49	16.2	16.27	15.97	16.2	16.79	16.15	15.9	16.95	16.52	15.87	18.15	16.06		17.1	16.14	16.69	16.66	17.41	17.3	16.78	16.74	15.59		16.23	16.74	16.66			16.62	15.8	16.04	17.23	15.3	15.38	15.67	15.98
1/P04211											16.36										16.07										16.14	16.68		15.96				16.19	15.76	15.77	16.15				16.23
1/P04216	15.19	15.3	15.91		15.72	17.43		17.68	16.95	15.1	16.16				17.54		16.12	17.95		18.17	19.01	15.29		16.66	15.56		16.35		16.9	15.49	18.7	18.19	18.48	16.74		17.28	15.49	18	18.54	17.7	18.71	16.86		15.02	18.13	16.41		15.88
1/P04217	16.4	16.94	16.48			16.44	17.33	16.61	16.37	16.71	16.62		16.35	16.39	16.68	16.46	16.34	16.38	16.11	17.42	16.81	16.59	16.61	16.77	16.41	16.43	17.04	16.33	16.69	16.6	16.57	16.2	16.28	18.41	16.36	16.42	16.7	17.16	16.24	16.1	16.58	16.78	16.42	16.34	16.07		16.22	17.07	16.57
1/P04229																																	14.16
1/P04233		15.19	15.66	14.68	15.84	14.42		15.74	17.44	14.62			14.45	14.61	16.65	14.07	15.62	15.4	14.05	15.08	16.3	14.54	14.36	14.2	14.91		17.32	14.41	15.01	14.18	15.67	14.85	16.56	15.57		14.43	14.41	15.24	16.54	16.08	15.6	15.71		14.6	16.32	15.22		15.56
1/P04259																					17.03												15.76			15.12										16.95
1/P04264	16.66	17.21	17.54	17.52	18.71	18.18	17.78	17.59	18.51	17.14	19.09	17.4	16.25	17.09	17.5	18.92	16.64	18.11	17.2	20.13	20.45	16.99	19.31	19	19.34	16.48	17.77	17.25	16.71	17.04	17.33	17.63	18.04	19.19	16.76	19.83	17.63	17.64	17.89	19	17.56	18.97	18.19	18.75	19.14	23.96	19.13	17.61	18.58
1/P04271																																													14.33
1/P04275				15.39													14.66				16.39			14.81	14.16		14.72		15.01		15.44							15.62			15.51
1/P04278																																						15.68
1/P04350	16.82	17.35	17.68	18.11	17.65	18.31	19.06	17.74	17.67	17.41	18.4	16.79	17	17.01	17.61	16.66	17.09	17.73	16.83	18.74	17.91	17.19	16.88	18.64	17.01	16.78	17.92	17.39	17.56	17.17	18.66	18.86	17.52	17.21	16.74	18.81	17.05	17.71	17.66	17.18	17.52	17.48	16.63	17.21	18.82	18.61	16.46	17.48	17.37
1/P04406	17.98	18.69	19.01	19.17	19.57	18.6	19.46	18.5	19.45	18.32	18.59	18.05	18.15	17.71	19.39	17.85	18.72	19.27	17.93	19.51	18.02	17.96	18.2	18.7	18.12	17.94	18.94	17.77	19.06	18.04	19.46	18.94	19.28	18.9	17.94	17.8	18.31	18.15	19.05	18.62	18.64	19.25	18.26	18.54	19.76	18.61	18.07	18.22	17.89
1/P04424	19.07	19.19		18.03	17.34	16.68		18.58	17.73	19.6	17.41	18.7	19.59	19.52	17.57	18.83	18.96	17.11	19.34	18.73		19.54	18.94	18.86	18.64	19.76	20.32	19.8	19.27	19.33	16.69			18.77	19.33	18.52	19.2	16.77	16.23	18.72	16.54	18.71	20.22	19.38	17.33	18.03	18.94	19.04	19.15
1/P04433	17.62	16.06	17.61	15.92	16.89	18.9	17.41	16.32	16.36	17.84	19.62	15.78	15.54	15.97	17.94	15.81	16.47	16.52	16.16	16.42	18.32	17.61	16.24	16.9	16.21	15.86	16.66	15.64	16.2	17.84	17.88	18.74	18.35	16.75	15.64	16.2	15.94	17.82	18.2	17.13	17.87	16.85	16.06	15.77	17.76		15.96	16.27	15.95
1/P04440																																	15.57	15.53					15.51			15.33
1/P04626					16.91				17.08																											16.88
1/P04632		16.78	17.12	16.64	17.31	17.69	16.96	16.81	17.48	16.65	17.67	15.82	16.29	16.31	18.39	15.86	16.69	17.58	16.13	17.88		16.59	16.39	16.98	16.13	16.19	16.97	16.22	17.12	16.72	17.78	17.77	17.61	16.9	16.22	17.64	16.59	18.15	17.72	16.79	17.57	16.82	16.26	16.4	17.26	17.7	15.94		16.31
1/P04637																																17.14
1/P04746																		15.89
1/P04792	18.08	18.17	20.88	19.77	21.19	18.56	18.95	19.57	18.17	17.85	17.81	17.53	17.1	17.77	17.95	18.16	18.38	21.2	17.85	20.63	18.49	17.88	17.98	20.72	18.34	17.67	20.45	18.11	19.03	17.7	19.04	17.99	18.4	19.91	17.6	21.13	17.8	18.51	18.35	20.38	19.02	19.72	18.15	17.76	18.78	18.96	17.47	18.61	17.73
1/P04818								16.81																							18.67										17.24	18.16					17.12
1/P04839		15.45											16.06	16.7	15.79								15.14										16.01	16.4	16.12				16.1				16.13		16.79	15.51			16.99
1/P04843	17.26	17.13	17.99	17.59	17.55	16.73	17.9	17.39	16.47	17.14	17.28	16.55	17.17	17.2	17.15	17.46	17.06	16.79	17.35	17.47	16.46	17.22	17.06	17.69	17.03	16.65	17.37	16.87	17.72	17.13	16.48	16.72	16.9	17	17.04	17.34	17.46	16.59	16.92	16.99	16.54	17.31	17.2	16.76	17.03	17.55	16.86	17.43	17.68
1/P04844	16.32	16.6	16.06	16.68	16.21	16.38	16.15	16.56	15.54	16.26	16.65	15.87	15.81	15.95	16.36	16.3	16.18	15.75	15.85	16.63	15.95	16.34	16.22	17	15.89	15.86	16.43	16.1	16.84	16.42	16.61	15.54	16.25	16.08	15.78	16.37	16.46	15.69	16.37	16.21	16.35	15.8	15.65	16.12	16.23	16.74	15.85	16.57	16.63
1/P04899		15.77	16.15		15.54	15.78	16.48	16.02	16.31	15.84				16.17	16	15.68	15.87		16.03	16.49	16.45	15.71	15.55	15.48	15.71		15.45		15.59	15.67	16.19		16.54			16.15	16.16	16.59	16.65	16.12	16.02	15.68		15.67	16.32	15.95	15.27	15.35	15.44
1/P04920										17.03							16.38
1/P05023	16.89	16.81	18.39	17.37	17.95	18	18.74	17.29	16.51	16.66	18.53	16.23	16.82	16.91	17.95	16.47	16.52	17.72	16.38	17.01	16.37	16.89	16.7	18.76	16.61	16.37	17.27	16.59	17.35	16.75	16.77	17.32	16.57	16.86	16.78	18.4	16.59	16.35	16.7	16.99	16.83	16.87	16.98	16.65	17.15	17.51	16.58	17.19	17.47
1/P05026	16.51	16.52	17.27	17.21	17.69	17.41	18.46	16.73	15.16	16.31	17.97	15.71	16.14	16.48	17.42	16.66	16.11	16.91	16.24	16.17	14.81	16.12	16.21	18.14	15.94	16.06	17	16.3	16.76	16.39	15.58	16.52	14.9	16.16	15.62	17.94	16.33	15.1	15	16.19	15.93	16.35	16.65	16.19	16.11	15.18	16.5	16.77	16.84
1/P05060							20.07
1/P05062	21.4	21.42	21.61	22.46	21.84	16.62	18.68	20.1	20.95	21.51	17.07	21.91	23.26	21.92	17.45	21.6	21.49	19.15	21.65	19.96	16.75	21.43	21.65	22.21	21.69	21.44	20.46	21.99	21.11	21.3	18.03	16.61	19.88	21.42	22.57	17.22	20.98	19.29	19.47	20.26	17.66	20.42	22.64	18.72	20.37	19.74	21.56	21.25	22.16
1/P05067											15.31				15.66																	15.65
1/P05089	18.69	19	18.82	19.31	18.7		16.39	17.47	17.49	19.24	15.46	19.03	19.57	19.92	15.56	19.08	19.26	16.63	20.03	17.59		19.22	19.54	17.83	18.16	19.43	19.62	18.92	18.14	19.13	16.5		16.99	18.45	19.75	16.5	18.92	16.94	16.96	18.65	16.3	17.89	19.93	19.52	17.5	17.59	19.27	18.6	19.05
1/P05090	16.58	15.98		16.06		16.28	16.54	16.75	15.36	16.6	17.93	16.58	16.58	16.36	15.87	16.48	15.57		15.23	16.49	15.96	16.51	16.37	16.29	15.58	16.01	15.63	16.35	17.04	16.66	15.98			15.82	16.18		17.52	16.31		15.76	15.88	15.61	16.82	16.09	15.69		16.42	16.32	16.36
1/P05091	19.98	18.71	17.85	19.56	17.53	15.91	17.36	18.3	18.28	16.92	15.99	19.23	20.33	18.6	16.56	20.47	19.56	16.73	20.24	17.86	15.02	19.84	18.43	16.84	19.3	19.26	17.57	18.09	18.21	19.55	16.81	15.51	17.39	18.41	20.26	16.8	19.87	16.53	16.62	18.08	16	18.63	19.96	19.76	16.93	17.75	18.39	18.7	18.46
1/P05106	17.09						18.98	16.91		16.39	16.93	17.12		16.93	16.51	17.48	17.72	16.58	17.48		17.6		17.07	17.2	17.23	17.24		16.77		16.18	18.87				17.12	17.3	16.57	19.64			18.45						17.21
1/P05107							17.66	15.94	16.85	16.75	16.31			16.34	16.03		15.13	15.57	16.06	16.03	16.23	15.48				16.41		16.34		15.25	16.4	15.93	16.74	15.65	16.34			14.87	16.82	15.99	16.4	15.71		16.18	17.05	15.76	16.3	16.19
1/P05109	17.07	17.78				17.2	19.68	16.03	17.28	17.33	20.77	16.1	16.81	15.84	20.25		16.82	16.35	15.72	18.77	17.92	17.33	15.94		16.37	15.33		15.94	18.43	17.13	20.26	16.51	17.53	15.95	15.97	17.44	17.14	20.05	17.73	14.74	20.23	15.72		16.36	19.73	19.93	15.86	18.48	16.01
1/P05114
1/P05120																15.35
1/P05121															17.96									17.23			17.48																		15.38	17.33
1/P05129
1/P05141	17.99	17.79	19.13	19.23	19.61	19.13	18.46	17.76	18.01	17.77	19.57	17.95	17.81	18.16	17.35	18.23	17.25	18.17	17.5	18.33	16.37	17.83	17.83	18.03	17.47	17.89	18.26	17.65	18.9	17.81	17.22	17.67	17.45	17.75	17.88	17.47	17.98	17.08	17.5	17.43	17.71	17.3	17.92	17.55	17.7	19.15	17.52	18.19	18.11
1/P05154																																						15.73
1/P05155	16.61	16.97	16.55	16.22	16.6	16.22	18.8	16.61	15.52	16.35	16.7	15.9	16.43	16.16	19.8	16.53	15.87	16	16.04	16.36	17.03	16.42	16.08	16.25	15.71	15.99	17.21	15.94	16.59	16.34	17.41	16.89	16.33	16.88	15.17	15.66	16.64	16.67	16.26	16.92	17.26	16.93	15.9	16.02	16.2	16.52	16.13	17.26	16.34
1/P05156		14.94		15.02			16.29				14.99				15.42			15.07			14.98		16.07	14.74					15.83			15.35		14.58							14.63	14.92						15.11
1/P05160													18.75
1/P05161		16.92	15.91	16.53	15.69	15.99			16.09	16.51	16.37			16.21	16.38		16.13	16.82	16.07		15.38	16.74	16.13	16.34	16.04		15.81			16.38	16.04	16.16	16.34			16.1	16.68	15.3	16.28	16.57	16.38			16.61	16.29	16.69	16.23	17.01	15.69
1/P05162
1/P05164	15.75	16.06	14.03			16.12	19.63	14.85	15.46	15.53	18.55	14.58	15	15.19	18	14.79	16.22	15.04	14.98	16.54	16.43	15.65	14.93	14.56	14.42	14.31			16.16	15.57	18.12	15.48	15.29		14.45		15.45	17.58	15.38		18.13		15	14.82	17.13		14.65	16.66	14.73
1/P05165	18.23	17.77	16.49	18.27	15.77	16.19		17.12		18	16.34	16.82	17.94	17.47	16.99	17.18	17.55	15.93	17.16	16.68		18.1	17.29	17.43	17.02	17.21	16.88	17.4	16.94	18.08	15.83			16.21	17.89	15.87	18.11	15.98	16.4	16.25	15.86	16.14	17.75	17.1	16.96	17.01	17.25	18.24	17.59
1/P05166	17.79	17.19	16.21	17.66	15.83	16.12		16.81	15.91	17.46	16.54	16.7	17.47	17.34	16.23	16.76	17.03	15.95	16.78	15.95		17.5	16.83	16.94	16.85	16.93	16.5	16.89	16.79	17.66	15.75		15.76	15.89	17.57	16.04	17.54	15.68	15.84	16.05	15.72	15.68	17.39	16.89	16.44	16.63	17	17.85	17.09
1/P05186	15.01	14.53						14.66		14.92							15.28			14.66		14.98	14.37						14.93	15.12	15.17							15.18			14.81		14.59			17.37		14.94	14.55
1/P05198	16.87	17.13	17.22	18.09	17.78	17.31	17.75	17.39	17.39	16.7	18.28	16.31	16.68	16.67	17.08	16.76	16.97	17.88	16.59	17.82	16.95	16.9	16.61	17.61	16.37	16.55	17.19	16.76	17.22	16.81	16.93	17.2	17.7	17.25	16.62	17.95	16.92	16.69	17.61	17.34	16.97	17.25	16.38	16.77	17.9	18.08	16.55	17.49	16.79
1/P05362		15.49						15.19	15.11						15.54		15.42	14.98		14.89	15.04								15.71		15.28		15.59				15.03	15.27	15.53	15.23	15.12	14.63			15.67	16.04		15.36
1/P05386	16.07	15.98	16.85	16.66	17.05	15.62	15.47	16.35	16.59	15.81	16.02	15.23	15.96	15.67	16.52	15.51	15.36	16.75	15.47	16.38	15.1	16.11	15.65	16.56	15.22	15.66	16.27	15.66	16.85	15.9	15.69	15.89	16.22	15.97	15.73	16.68	16.1	15.69	16.16	16.17	15.87	15.99	16.44	15.6	16.01	17.23	15.65	16.02	16.01
1/P05387	19.05	18.52	19.41	19.4	19.62	18.2	17.64	19.27	19.63	18.56	18.27	16.91	18.83	18.38	18.95	18.51	18.39	19.39	18.47	19.57	18.39	18.54	18.42	19.44	17.19	18.36	19.4	18.2	19.57	18.57	18.57	18.74	18.93	18.79	18.11	19.75	18.82	18.56	18.86	18.66	18.48	18.75	19.32	18.14	18.66	19.65	18.15	18.9	18.51
1/P05388		16.31	16.19	16.79	16.68	16.23		16.65	16.12	15.89	15.9	16.16	16.21	15.83			16.13	16.55	16.21	16.79	15.66	16.29	16.55	16.3	15.72	16.16	16.92	16.28	16.98	16.36	15.57	15.67	16.3	15.38	16.06	16.55	16.16		16.11	16.17	15.96	15.82	16.07	16.53	16.48	16.87	16.17	16.36	16.15
1/P05413													14.91						14.95																							15.04
1/P05423		14.03															13.66
1/P05452												13.71			14.5					14.52					14.23		13.87				14.52		14.75					14.18	14.9	14.51					14.98
1/P05455	15.59	15.78	16.04	16.93	16.62	16.76	16.67	16.25	17.32	16.05	17.42	15.9	15.67	15.57	17.34	15.88	16.13	17.73	15.7	17.23	15.85	15.99	15.65	16.07	15.57	15.49	16.79	15.76	16.32	15.97	16.02	16.65	16.99	15.9	15.42	17.12	15.63	16.23	16.98	15.93	15.8	15.8	15.57	15.75	16.27	16.28	15.47	15.97	15.2
1/P05543			14.67		15.06																				13.99			13.02								14.16
1/P05546		14.19	13.66		13.84	13.7	13.85			13.34	14.24				13.69					14.59	13.66			14.63			14.64					13.49		13.32		13.7				13.97		13.88			14.23		13.73	13.76
1/P05556	16.57	16.23	16.53	15.87	16.34	17.29	18.04	16.65	16.21	16.49	17.23	15.81	16.37	16.68	17.93	16.72	17.23	18.25	16.23	16.98	17.08	16.37	16.09	17.1	16.07	15.76	16.52	16.38	16.39	16.52	17.59	18.16	16.63	16.54	16.01	17.08	16.86	17.47	17.1	16.44	17.64	16.59	16.3	15.96	17.36	16.93	15.95	16.62	16.55
1/P05771									15.99																														14.56
1/P05783	21.33	19.99	17.92	17.69	18.79	19.4	19.95	20.51	19.1	20.45	19.71	18.76	18.89	19.84	22.3	20.07	20.09	20.3	19.98	19.94	15.74	20.58	19.59	20.62	18.84	19.34	20.06	19.46	20.49	20.64	20.15	22.68	17.74	18.87	19.35	20.99	20.09	20.25	17.67	19.24	19.97	18.47	19.69	19.73	18.98	18.91	19.68	20.35	19.72
1/P05787	19.15	17.41	16.04	16.16	16.5	18.48	18.15	17.66	17.78	18.2	18.87	16.86	16.6	16.87	18.91	17.6	17.08	17.76	17.08	16.97	15.47	18.08	17.67	17.68	16.49	17.24	17.74	17.43	17.79	17.78	18.11	19.75	15.93	16.76	16.99	17.64	17.66	16.89	16.55	16.53	17.68	16.33	17.86	16.82	16.81	16.73	17.51	17.95	17.03
1/P05937	19.37																					19.38																						16.04
1/P05997		15.64											15.18
1/P06132	14.24	14.35	14.63	15.22	14.94			14.26	14.24	14.56		14.1	14.16	14.46	15.19	14.12	14.38	14.64	14.1	14.06		14.73	14.51			14.78	14.55	14.05	14.89	14.22	14.28	13.85		14.03	14.49	13.86	14.39	14.14	14.23	14.05	14.44	14.12	14.9	14.43	14.85	15.28	14.35	14.52	14.26
1/P06213	13.85	13.83	13.98	14.24	14.48		13.88	13.91		13.75	12.95				14.6	13.53	13.06			13.74		13.82		14.16			14.34	13.44		13.79		13.41				13.84	14.41								13.99	14.32	12.99	14.08	13.39
1/P06239																								16.28						15.82				15.73
1/P06276								16.45				16.37		16.6		16.28				15.61		16																					16.29	15.29				15.94
1/P06280	13.53																												15.21					14.16
1/P06310											15.68										14.89											15.57
1/P06311																																	15.21						15.28
1/P06331		16.32				17.02					16.77	16.28									16.67	16.32	16.05		15.92	16.69		17.15		15.68	16.34	16.19	16.57				16.3		16.55	16.3	15.55			15.95		16.4		16.97	16.38
1/P06340									16.77
1/P06396	15.28	15.52	15.83	15.06	15.62	18.18	17.99	17	17.68	15.38	18.11	15.19	15.32	15.36	17.82	15.61	16.7	18.8	15.28	16.79	17.75	15.49	15.1	16.55	15.91	14.76	16.6	15.02	16.06	15.54	18.08	18.13	18.41	17.34	14.72	16.35	15.4	17.4	18.34	17.22	18.06	17.31	15.09	15.36	17.84	16.26		16.37	15.13
1/P06400								16.29																												16.62
1/P06454		15.58																				14.99
1/P06493																			16.69			17.07						16.79
1/P06576	20.25	20.3	20.05	20.85	19.91	19.59	19.24	21.07	19.91	20.02	19.58	19.55	20.5	20.6	20	20.6	20.28	20.39	19.99	20.27	18.68	19.99	20.14	20.95	19.63	20.22	20.11	20.47	19.6	20.06	19.4	19.85	19.3	19.8	20.17	20.1	20.62	19.11	19.23	19.68	19.22	19.6	20.41	20.19	19.5	20.62	20.32	20.88	21.01
1/P06681			16.31	15.79	15.91	15.51		16.06			15.25				15.99					16.04	15.27			16.11			16.36		15.28	15.14	15.82		15.34	15.61		16.28				15.32	15.76	15.48			16.14	15.44		15.52
1/P06702	17.33	17.81	15.25	16.01	15.61	17.62	19.91	16.19	17.34	17.17	21.21	15.98	16.5	16.14	20.41	15.57	16.91	16.55	15.98	18.73	18.14	17.14	16.3	15.51	15.81	16.05	15.46	15.68	18.32	17.23	20.14	16.99	17.8	16.15	16.19	17.2	17.14	19.59	17.81	15.14	20.56	16.11	16.01	16.15	19.52	19.77	16.14	18.48	15.81
1/P06703		17.36			16.23			18.47			22.71	16.99	15.89	17.01	21.95	16.49	17.74		16.22	19.61	20.32	16.65	16.89	17.09	17.99		18.07	15.51	17.95	17.16		19.7	20.36	17.79	15.99			21.36		19.14	19.46	18.2	15.82	16.93	19.35		16.13		15.83
1/P06727			15.79		15.81	16.59	16.09	15.32			17.96	15.3			15.99			15.47			15.99				15.62						15.35	16.29	16.08	15.9				15.74	16.25	16.11	15.43	15.75			16.59
1/P06730	15.1	15.2	15.21	15.86	15.38		17.14	15.28	15.86	15.18	15.9	14.82	15.17	15.29	16.82	15.28		15.52	15.35	16.04	14.79		14.88	14.9	14.87	14.85	15.33		15.73	15.07	15.04		15.53	14.81	15.1	15.78		15	15.56	14.83	15.26	15.26		14.98	15.65	14.97	14.76	15.36	15.12
1/P06731						16.47	15.35				22.47																				15.17										16.8				15.14
1/P06732
1/P06733	18.23	18.68	18.29	20.46	18.83	17.95	17.73	18.34	20.04	18.52	18.36	18.16	18.96	18.45	18.76	17.84	18.81	19.7	18.06	19.39	17.45	18.48	18.48	18.29	17.74	18.79	19.36	18.65	18.21	18.45	18.69	19.79	19.45	19.05	18.47	18.83	18.39	18.71	19.4	18.46	18.53	18.83	18.71	18.63	20.28	19.4	18.22	18.5	17.83
1/P06737	17.83	17.49	14.99	15.93	15.36		14.61	16.87	16.11	17.9	16.67	18.07	18.63	18.37	14.77	17.91	17.88	14.99	18.1	16.66	16.52	17.9	18.16	17.31	17.71	18.06	16.28	18.36	16.82	17.7	15.33		15.36	15.97	18.2	15.4	17.2	15.49	15.08	15.82	15.78	16.07	17.99	18.4	15.66	16.26	17.91	17.46	18.03
1/P06744	17.22	17.6	16.94	18.57	17.96	17.08	16.47	17.04	17.98	17.47	17.2	17.45	17.75	17.37	17.83	17.64	17.68	17.56	17.34	18.06	16.27	17.43	17.49	17.81	17.79	17.55	18.2	18.02	17.73	17.29	17.44	18.42	17.64	17.8	17.31	16.79	17.06	16.71	17.58	17.65	17.55	17.61	17.43	17.63	18.71	17.31	16.91	17.51	17.07
1/P06746
1/P06748	16.19	16.72	17.38	17.91	18.64	17.93	17.18	17.01	17.49	16.5	18.64	16.06	16.42	16.51	18.2	16.24	16.3	18.28	16.79	17.92	16.8	16.67	16.51	16.62	16.22	16.61	17.65	16.04	17.7	16.85	17	17.12	17.8	16.85	16.25	17.79	16.79	16.88	17.78	17.1	16.54	16.63	16.61	16.79	17.1	17.77	16.72	15.94	16.46
1/P06753	16.55	18	19.21	18.44	19.18	17.03	17.42	17.69	19.12	17.26	16.86	16.8	17.1	17.02	18.4	16.79	17.76	17.9	17.27	19.57	18.51	17.21	17.22	19.56	17.5	16.34	18.96	16.54	18.49	18.09	17.25	17.65	18.9	17.83	17.4	18.83	18.15	18.08	18.92	17.97	16.59	17.78	17.54	17.4	19.01	18.95	17.14	17.34	17.3
1/P06756		14.28	13.15	14.14		15.38	15.42	15.08	14.14	14.01	14.76		14.44	14.66	17.22	14.07	15.45	16.52	14.42	14.94	16.12		13.95	14.45	14.35			13.94	14.61	14.1	16.43	16.48	15.54	14.66		14.43	14.41	16.27	15.58	14.73	16.53	14.54	14.24		14.99	15.16	14	14.57	13.84
1/P06858																																		14.51
1/P06865	15.82	15.68	15.3	15.95	15.9			15.67	16.19	15.86		15.37	15.27		17.39		15.86		15.56		15.44	16.16	15.64			15.33	16.09	15.21	16.33	16.2	16.19	16.1	16.1	15.76	15.38		15.73		16.01	15.77	16.39	15.65	15.7	15.72	16.33	17.22		15.92
1/P06870																											15.57
1/P07093																		15.47			15.17											15.93	14.95						15.2			14.66
1/P07099	19.73	20.08	19.82	18.81	20.75	16.44	14.82	20.44	18.2	20.29	15.84	19.83	19.27	20.47	17.32	20.03	19.28	15.98	19.84	20.43	15.57	20.26	20.79	20.72	19.64	20.64	23.43	20.22	22.09	20.25	17.05	15.03	16.62	21.1	19.97	18.84	18.94	16.42	16.25	21.9	16.49	20.9	19.94	20.44	18.31	19.33	20.34	19.76	20.69
1/P07108	17.4	17.84	17.67	19.18	18.28	15.98		16.29	17.93	18.27	16.38	16.64	18.46	17.33	16.8	17.06	17.81	17.22	17.62	18.49		18.14	17.53	16.43	16.71	18.15	18.28	17.59	17.9	17.94	16.01	16.42	16.77	16.78	18.1	17.51	17.03	15.77	16.72	15.94	15.53	16.43	18.75	18.68	16.62	17.3	17.2	17.42	17.42
1/P07148	18.06	19.48	17.48	17.42	18.4	16.92	17.6	17.6	19.29	19.01	17.22	19.41	20.32	17.98	16.55	19.37	19.54	17.67	18.77	19.06	15.92	18.87	18.78	17.31	19.6	18.94	16.95	19.13	20.26	18.91	18.55	17.19	18.11	18.83	20.16	16.79	18.33	17.9	18.01	17.38	15.65	17.53	19.22	19.97	17.44	17.58	18.48	18.39	18.13
1/P07195	16.42	16.85	15.58		15.75	18.39	17.91	17.32	19.77	17.02	18.01	15.9	16.38	16.23	17.95	15.87	17.49	19.44	16.16	17.75	18.49	16.64	16.54	15.93	16.17	16.53	17.13	16.15	16.86	16.71	18.89	16.91	19.02	17.2	16.65	16.58	16.79	19.3	19.04	17.04	18.75	17.2	15.97	16.55	17.77	17.91	16.03	17.12	15.94
1/P07196									19.5									17.31																														17.5
1/P07203	17.18	17.8	15.56	16.45	16.06	17.31	16.86	17.44	18.6	17.26	18.04	17.33	17.94	17.45	17.29	16.35	17.4	17.87	17.44	17.16	16.31	17.66	18.17	16.03	15.81	17.8	16.9	17.88	17.89	17.15	17.18	17.3	17.89	17.64	17.45	17.9	17.48	17.29	17.92	17.46	17.38	17.65	17.96	17.56	17.94	17.83	17.88	18.44	17.13
1/P07204		15.27				18.1					16.87	16.83			17.24					18.24				18.04	18.12									17.26			17.07		17.51			17.08				17.76
1/P07225							16.88				17.63				17.05						15.56			16.87												16.55													15.51
1/P07237	20.61	20.6	19.21	20.58	19.9	18.08	18.92	19.82	18.77	19.95	18.27	19.27	20.68	19.83	19.87	19.99	19.82	18.77	20.06	20.34	17.51	20.19	19.94	19.85	19.18	19.67	20.36	19.76	21.59	20.03	18.77	19.18	18.99	20.49	19.76	19.65	20.22	18.53	18.88	20.04	18.51	20.5	20.04	19.62	19.6	19.32	20.21	20.91	20.6
1/P07288											17.24																					16.92						15.92
1/P07305	18.92	18.16	17.79	18.27	17.1	18.33	17.03	19.29	18.04	18.86	17.56	17.19	18.48	18.45	20.22	18.52	18.59	20.9	18.41	20.85	17.09	18.81	17.75	20.53	17.79	18	20.66	17.89	19.62	19.18	19.01	18.05	17.86	18.11	17.85	21.43	19.47	17.47	17.48	17.54	17.98	17.95	17.59	17.78	17.52	19.67	17.59	18.21	17.92
1/P07332																					16.13
1/P07339	17.02	18.47	17.06	17.38	16.74	15.42	15	17.05	15.9	18.5	15.92	17.65	16.71	17.73	19.37	16.49	18.01	15.4	17.47	18.57	15.31	18.43	18.09	17.26	16.85	17.16	17.35	17.43	19.08	18.83	16.17	16.16	18.23	17.08	17.45	18.01	18.29	17.29	18.12	17.57	15.8	16.91	17.03	18.1	18.58	16.82	17.38	17.23	17.16
1/P07355	18.43	17.73	17.95	19.12	18.47	20.78	19.98	20.14	19.34	18.61	20.38	16.75	17.59	17.08	20.79	17.8	19.39	21.61	17.06	20.71	19.93	18.63	17.43	19.25	18.56	17.7	20.68	17.38	19.17	19.08	20.51	20.52	20.59	19.54	16.96	22.08	18.15	19.91	20.47	19.77	20.58	19.52	16.82	17.52	20.47	20.22	16.84	18.6	17.1
1/P07357		17.09	17.11		17.14	17.37	17.29				17.91		16.59								17.37	16.74								16.83	17.23			16.92			16.61		17.39		17.64	17.11			17.06	17.59		17.21
1/P07358			15.48		14.93	14.59	15.42				15.55				14.22						14.65								14.86		15.18	15.01	14.14				14.46	14.71	14.68		14.84				14.66	14.44		14.66
1/P07359
1/P07360						15.76	17.18	15.27			17.28				16.51	15.32				15.43	15.92								15.96		16.07	16.11	15.35					15.71	15.49	15.45	16.06				15.95
1/P07384	15.47	16.59	17.04	15.84	17.01	17.02	15.49	16.33	16.88	16.4	17.23	15.54	15.2	16.53	17.93	15.49	16.4	15.68	16.08	17.91	16.83	16.51	15.98	15.84	16.17	15.32	16.93	15.57	16.66	16.47	16.68	16.66	17.05	15.46	16.24	17.48	15.9	16.98	17.08	16.72	16.8	15.52	15.81	16.24	16.6	17.01	15.81	16.08	15.97
1/P07437	18.14	18.97	20.73	20.77	20.67	20.35	20.54	20.7	20.96	18.88	20.3	18.23	17.93	18.67	19.01	18.54	19.2	21.24	18.12	21.12	19.58	18.86	18.6	20.9	18.91	18.3	21.24	19.33	19	18.61	20.19	20.9	20.33	19.53	18.11	21.83	18.63	18.82	20.39	19.89	20.02	19.25	18.61	18.55	21.02	21.92	18.6	19.8	18.64
1/P07451																															17.41
1/P07478			14.86																						14.15															14.7
1/P07585	16.48	15.68				19.59	15.41	16.94	18.25	16.21	17.83	16.62	16.13	16.51	19.21	16.48	18.05	20.09	15.63	17.12	19.59	16.48	15.95	15.77	17.64	15.52	16.03	15.78	16.19	17.12	18.92	18.67	19.06	17.87	15.38		15.75	18.39	19.13	18.96	19.05	17.77	16.05	16.35	19.29		15.22	16.66
1/P07602	17.21	17.11	17.12	16.4	17.47	16.83	16.29	17.28	17.86	17.81	16.79	16.53	16.69	16.85	19.04	16.84	17.53	17.36	17.08	18.02	16.91	17.88	17.49	17.76	15.98	16.4	17.34	16.87	17.45	17.53	17.44	17.23	18.24	17.51	17.07	17.35	18.21	16.99	18.15	18.06	17.3	17.48	17.21	17.02	18.22	17.9	17.04	16.94	16.95
1/P07686	16	15.81	16.69	17.04	16.97	15.6	15.68	16.05	15.12	16.08	15.88	15.01	15.69		17.34		15.26	15.61	15.52	15.57	15.07	16.34	15.66	15.82			16.73	15.27	17.34	16.07	15.78	16.08	16.12	15.86	15.22	17.32	15.3	15.28	16.27	15.8	15.97	15.76	15.46	15.67	16.31	16.92		16.04
1/P07711	17.52																18.4		18.01							17.74			17.93						17.67									17.97			17.82	16.95	17.45
1/P07737	20.1	20.32	21.25	21.59	21.27	20.38	21.8	20.33	22.52	20.37	20.72	19.45	20.71	20.14	21.22	20.42	20.57	21.27	19.97	22.4	19.63	20.55	19.82	20.26	19.87	19.92	21.3	20.05	21.1	20.27	21.01	21.6	21.54	20.44	20.26	20.8	20.17	20.74	21.71	20.16	20.93	20.74	20.48	20.22	21.16	19.84	19.57	20.63	19.44
1/P07738																		14.77																				15.4
1/P07741	17.28	17.45	15.89	16.77	16.45	17.07	18.35	16.77	17.82	17.56	17.68	17.57	17.15	17.29	18.92	16.67	17.7	17.79	17.56	18.01	16.53	17.78	17.83	16.13	16.97	18.16	18.71	17.31	18.34	17.72	17.53	17.58	17.66	16.77	17.77	18.08	17.31	17.19	17.47	17.2	17.48	16.66	17.89	18.07	17.49	17.46	17.1	17.42	17.38
1/P07814	15.98	15.89	16.7	16.2	17.15	15.69	16.62	16.39	16.07	15.72	15.85	15.55	16.22	16.09	16.96	15.89		16.9	16.17	16.97	15.37	16.36	15.7	16.72	15.77	15.76	16.77	15.74	16.66	16.22	15.29	16.79	15.96	16.18	16.29	16.8	16.05	15.51	16.21	16.15	15.68	16.49	16.15	15.84	16.58	15.9	15.75	15.97	15.9
1/P07858	18.74	18.22	18.32	17.05	18.21	17.76	16.81	17.6	17.42	19.09	18.24	18.21	19.14	17.55	21.99	17.29	18.25	17.9	18.16	17.35	16.54	19.06	18.24	16.73	17.99	17.91	17.9	17.69	18.88	19.01	17.88	18.59	18.96	18.14	18.63	17.13	18.8	17.52	18.93	17.63	17.86	18.09	18.68	17.96	18.69	17.82	17.9	18.25	17.76
1/P07900	16.92	18.45	19.98	18.85	20.22	18.12	18.85	18.59	18.46	17.84	18.35	17.79	17.38	18.06	18.64	17.37	16.86	18.33	17.9	20.16	16.99	17.74	18.32	17.86	17.88	17.83	19.21	17.33	18.59	17.63	17.49	18.08	19.13	17.87	18.03	19.3	17.86	17.93	19.01	18.36	17.69	17.82	18.03	18.1	18.94	18.06	17.81	18.04	17.59
1/P07902	16.16	16.01		15.78	15.86			15.71	15.87	15.76		16.07	16.24	16.65	15.49	16.81	16.81		16.78	16.14		15.94	16.66	15.74	16.14	16.52	15.98	16.47		15.93	15.65			15.92	17.19	15.87	16.06			15.44		15.21	16.67	16.55	15.63	16.41	16.7	16.11	16.74
1/P07910	17.88	17.93	20.15	19.88	20.07	18.38	19.39	18.97	20.33	17.61	18.77	16.67	17.74	17.73	19.3	17.89	17.86	19.48	17.95	20.04	17.81	17.59	17.58	19.73	17.46	17.23	19.09	17.23	18.2	17.72	18.48	19.16	19.01	18.24	17.52	19.52	18.27	17.86	19.19	18.23	18.24	18.4	17.93	17.66	19.17	20.1	17.25	18.15	17.55
1/P07911								15.34						15.71									15.55							15.27							15.65			15.35
1/P07919		17.2									14.92		16.79	18.29	15.39			15.5						17.2
1/P07942		17.85			17.49	16.39	16.52	17.36				18.47			16.21		17.2	17.71	17.37	15.48	16.78	17.61		18.74	18.3		18.88	17.59	17.28	17.72		17.68	17.71		17.58					15.42	16.46	16.01	17.13	17.79	17.25		17.55
1/P07947															14.35					14.94				15.02						14.61			14.1			14.42												14.28
1/P07948									15.29								14.95																						15.15						14.4			14.58
1/P07951				15.45	15.27	16.56		15.5							15.3		15.86														16.84	17.01						16.42		15.48	16.77				15.89	15.31
1/P07954	16.67	16.98	17.66	17.27	17.88	15.78	15.52	17.43	16.46	16.81	15.79	16.9	16.96	16.84	16.05	16.74	16.71	15.58	16.8	17.22	15.24	16.86	17.17	16.91	16.95	16.66	17.23	17.06	16.66	16.89	16.11	15.12	15.98	17.09	16.67	16.38	16.91	15.56	16.17	16.82	15.44	16.81	17.27	17.05	16.92	16.65	16.95	17.17	17.03
1/P07992		15.95																										15.35																		14.87
1/P07996	14.24	13.76				19.72	15.23	14.61	13.96	13.9	17.36		13.4		15.91		14.5	18.12		15.75	15.71	14.52		14.71	13.81	14.1	14.52		14.44		17.31	19.4	16.59	16.55		15.75	14.45	16.64	16.53	16.23	17.82	17.14			16.98			13.99
1/P08069								15.25												14.65
1/P08107	18.63	18.7	19.14	19.78	19.71	19.01	20.82	19.25	19.34	18.78	19.06	18.07	18.53	18.17	19.93	18.3	18.65	21.14	18.19	21.78	18.46	18.84	18.68	19.27	18.38	18.64	20.67	18.35	19.03	18.94	19.44	17.76	19.52	19.6	18.23	20	18.92	19.01	19.25	19.18	18.63	19.79	18.37	18.59	19.42	19.22	18.27	18.71	18.44
1/P08123	16.73	15.84				19.87	16.63	18.6		16.67	18.47	16.02	16.02	16.75	18.91	16.8	18.28	19.82	16.42	18.84	21.15	16.64	16.1	16.45	17.18	15.78	16.74		16.23	16.99	20.58	19.09	19.76	17.76	15.49	16.48	16.96	19.52	19.84	19.54	20.56	17.89	16.43	15.71	20.14	15.89		16.68	15.67
1/P08133	18.23	19.18	18.16	18.82	18.59	17.63	17.37	18.81	19.05	18.63	17.09	19.16	17.63	19.7	17.86	19.29	18.64	17.24	18.49	18.52	19.06	18.87	18.86	20.13	18.79	18.55	19.33	18.31	18.32	18.79	18.94	16.7	19.15	17.76	18.45	16.52	18.55	19.06	19.04	18.49	18.72	17.48	18.33	18.9	18.64	20.45	19.39	18.77	18.98
1/P08134		15.34						15.01		15.11	15.45				15.27		15.02	14.64				14.91									15.64										15.5				14.99
1/P08174											16.67
1/P08183	16.24									16.42	17.4			16.04		16.08	17.76	17.16		18.46		16.33	15.91	16.06				15.61	16.29	16.72			18.53	17.05			16.28		18.7	18.88	20.6	16.89						16.37
1/P08185							17.86														16.61									15.91			16.71	16.54			15.9		16.72			16.75				16.45
1/P08195	14.94	14.62	13.46			16.28		14.79	14.94	14.92	17.13	13.41		14.08	15.2	13.95	14.45	14.85	13.97	13.94	14.34	14.92	14.05	14.26	14.05		14.5	14.07	14.51	14.88	14.8	14.44	15.12	14.49			14.46	14.18	15.32	14.83	14.92	14.32	13.78	14.14	15.64	15.82	13.9	15.03	14.48
1/P08217							15.38
1/P08236	16.89	16.66	17.65	17.19	17.32	16.46		17.33	16.04	16.83	16.53	16.69	16.63	16.45	17.64	16.18	16.35	16.39	16.85	16	15.53	16.55	16.62	17.2	16.11	16.52	17.18	16.69	17.42	16.89	16.21	17.11	15.89	16.58	16.35	19.36	17.21	15.39	15.82	16.59	16.22	16.58	16.41	16.5	18.67	17.7	16.68	17.09	17.51
1/P08237						16.22			16.81		16.56									16.37	16.08						15.77				16.28		16.13	15.95		16.82		16.38	16.12	16.31	16.05	16.48			16.33	16.63
1/P08238	17.43	18.38	18.73	19.34	19.38	18.25	19.76	18.48	19.05	17.89	18.43	17.2	17.81	17.55	19.92	18.09	17.74	18.77	17.38	19.75	17.16	17.65	17.72	19.12	17.33	17.45	19.69	17.56	18.69	17.66	17.69	18.74	18.86	18.05	17.63	19.76	17.89	18.25	18.85	17.82	17.77	18.26	17.45	17.83	19.36	19.27	17.35	18.37	17.19
1/P08240		14.65	14.71	14.97	15.32		14.44	14.74	14.53		14.17	15.63	14.96	14.71		14.94	14.36		14.57	14.7			14.79	14.61	14.37	14.72	14.9	14.85					14.34				14.32		14.47				14.73	15.11				14.75	14.35
1/P08243						14.45					15.26				14.65																								14.03
1/P08246	14.93	15.35			14.93	14.98	17.92			14.66	16.71				17.11					15.14	15.31	14.68		14.54					15.25		16.55	14.21	13.99				14.6	17.4	14.38		16.74	14.43			16.52			15.04
1/P08247																																						16.82
1/P08294						17.09		16.27	16.46	16.17	16.86	16.12	16.07		16.24	16.05	16.4	19.39		17.27	17.27	15.51				16.39			16.57	15.73	17.82	16.86	18.06	17.04			16.26	17.47	18.08	16.96	17.45	17.15	16.29
1/P08311	15.58	16.36				15.88	20.93	15.98	16.28	15.66	17.5	15.28	16.36	16.09	18.46	15.08	17.68	15.71	15.11	17.75	19.39	15.61	15.19	17.34	15.56	14.54		15.83	17.09	15.73	19.99	15.92	15.7	14.73	14.99		16.08	18.36	15.55	13.99	19.79	14.55	14.6	15.4	18.2	17.51	14.77	17.66	15.27
1/P08397	16.15			16.39	17.51										18.62	16.24								16.8	15.93			16.47														16.27				17.05		16.83
1/P08473											14.47			14.47					14.95							14.72									14.78												14.55		15.26
1/P08493																		15.81														15.28	16.72	14.94					16.45			15.07
1/P08514																16.6		16.95																								16.75
1/P08519																																		16.03									14.21
1/P08559	16.5	16.97	16.2	17.3	16.28	17.57	15.77	17.58	16.73	16.54	18.25	16.49	16.19	17.18	17.2	16.75	16.37	16.32	16.29	17.06	16.31	16.71	16.66	16.58	16.8	16.4	17.07	16.07	16.12	16.83	16.73	16.79	16.94	16.39	16.73	17.5	16.72	16.38	17.19	17.27	16.6	16.54	16.68	16.58	17.01	17.53	16.64	17.02	16.16
1/P08567		14.79			15.91				16.87												15.08	14.98					15.31	15.76					15.48						15.04
1/P08571	16.46	15.82		14.94		14.99	14.6	15.83	14.71	16.26	15.26	14.83	15.34	14.74	15.54	14.92	15.18	14.88	15.57	15.3	15.82	16.13	15.2	16.03	15.08	14.94	15.77		16.4	16.07	15.83	15.03	15.66	15.03	14.77		15.68	14.64	15.78	15.6	15.95	15.59	15.08	15.23	15.15	16.83	15.11	16.27	15.49
1/P08572	17.63		19.02	16.63	16.55	20.32	16.41	18.01		17.09	19.65	15.49	16.61	17.09	19.51	17.47	19.11	21.69	17.18	19.47	20.41	17.36	16.31	19.77	17.8		16.54	16.51	17.3	17.26	21.21	21.21	19.67	19.23	15.83	16.98	17.71	20.3	18.41	19.42	20.85	16.87	16.35	16.59	19.25	18.09	16.51	17.27	16.89
1/P08574	16.18	16.48	16.74	17.76	16.1	16.09	16.37	17.81	15.42	16.56	16.7	16.77	16.76	17.21	16.47	17.26	16.13	16.7	16.52	16.8	14.67	16.63		17.96	16.62	16.5	17.13	16.52	16.55	16.49	15.49	16.19	15.52	17.07	16.87	16.13	17.06	15.59	15.88	16.85	15.47	17.25	16.73	16.38	15.99	17.1	16.5	16.46	17.21
1/P08575		16.55	17.29	18.33	18.79	17.49	17.69	18.89	18.83				18.25	17.86		16.62	16.55	18.11	17.3	17.53			16.49			16.28	16.89	17.72	16.24	18.08	17.78	16.33	17.39	16.74	16.38	16.79	17.06	16.89		17.32	15.47	17.11	17.32	17.72		17.54			17.87
1/P08579			16.18						15.96						15.87												16.03															15.8
1/P08581		17.52	18.84	17.64	17.64	18.99	17.66	16.95	17.96	16.78	17.55	17.3	16.69		18			17.48		19.15	18.58	16.64	16.75	18.89	19.45	17.04	17.82	17.22	17.21	16.87				17.85		17.38	17.39		18.32	17.76	17.39	17.61	17.35	16.81	19.22	18.54	17.19	17.48	18.36
1/P08582																																														16.53
1/P08603	14.48	14.7	16.5	14.58	15.99	15.42	16.19	15.37	14.19	14.55	16.98	14.15	15	14.55	16.14	14.42	14.69	14.77	14.23	15.2	16.43	14.54	13.99	16.42	15.01	13.78	15.33	14.31	14.81	14.42	16.52	15.93	15.07	15.48	14.47	14.46	14.32	15.72	15.01	15.55	16.4	15.43	14.45	14.8	16.64	13.94		14.97	14.36
1/P08621	15.66	16.07	16.96	16.74	17.16	16.37	16.08	16.8	16.67	16.18	16.33	15.58	15.77	16.01	17.26	15.88	16.21	17.08	15.83	16.73	16.38	15.83	15.46	16.94	15.76	15.69	16.7	15.77	16.5	16.08	15.88	15.76	16.4	15.88	15.66	16.83	16.07	16.88	16.37	15.93	16.05	15.9	16.06	16.15	16.79	17.63	15.82	16.11	16.18
1/P08631														12.91
1/P08637	15.79	15.93					15.78	15.83		16.2			15.45	15.5		15.18	16.15			15.81		16.32	15.55			15.18	15.58	15.83	15.88	16.11	17.61	15.79	16.02				16.44	16.19	16.24				15.87	15.72	16.71	15.73	15.7	16.26	15.63
1/P08648		15.88	15.75		15.82			15.62							15.78					15.65				15.95					16.08						15.55	15.79							16.24	15.47	15.75			15.9	15.79
1/P08651			14.73
1/P08670	17.03	18.89	19.01	16.92	18.32	19.56	17.13	19.56	19.83	17.96	18.76	17.08	16.81	17.77	19.83	17.1	19.21	18.87	17.86	20.89	21.4	18.18	17.47	19.1	19.02	16.45	18.73	16.51	18.96	18.99	19.73	19.82	21.47	19.02	17.24	18.89	19.14	20.8	21.5	20.5	19.66	18.94	17.05	17.58	20.85	19.98	17.28	18.16	17.05
1/P08697	15.4	15.62					15.94	15.21			15.7			15.12		15.48			15.59			15.09		15.76				15.43	15.95	15.77		15.57			16.1		15.67	15.49		14.98	15.23	14.89		16.17			15.21	15.72
1/P08709								14																14.42			14.66			13.94						14.21
1/P08727	15.18	15.37		16.21		20.27	19.89	15.42	17.03	14.79	20.43		15.62	15.18	18.29	15.13	16.43	18.91	14.67	17.6	15.45	14.97	14.87	15.07	15.15	15.3		15.35		15.68	18.76	20.6				18.62	15.98	18.39			18.59			14.53				15.5	14.96
1/P08729	15.57	16.07				15.36	16.17	16.63	16.75			15.26	15.98	16.39	15.27	16.1	17.11	20.5		18.32		15.12	15.78	17.49	15.84		17.99	15.13		16	19.23	16.99		16.54		18.71	15.59	18.06		17.17	18.97	16.37	15.47	15.65	14.79			17.19	15.65
1/P08754			15.87	14.83	15.46	15.14	14.29	14.58	14.46	14.6	15.87	14.46		14.96	15.23	14.22	14.37	14.45	14.34	14.91	15.06	14.7	14.58	14.94	14.41	14	14.08	14.28	14.71	14.75	14.66		15.17	14.14	14.26	14.5	14.54	14.9	15.44	14.9	14.56		14.01	14.55	15.1	15.5		14.84	14.75
1/P08758	16.68	18.34	16.81	18.16	16.01	19.06	18.58	18.67	17.9	17.68	18.09	17.21	17.34	17.65	21.61	17.23	18.74	20.09	17.52	20.42	19.88	17.47	17.68	17.52	18.83	17.71	17.1	16.38	18.86	17.84	19.07	19.55	20.32	18.74	17.53	16.84	18.53	20.11	20.33	19.37	19.12	18.68	17.88	18.07	19.39	18.02	16.96	17.37	17.93
1/P08779			18.54			16.8	16.94	17.81	17.24		16.93						17.29																18	18.15						17.31
1/P08865	18.82	18.98	19.31	19.39	19.47	18.43	18.9	19.68	18.94	18.73	18.92	18.23	17.92	18.7	19.32	18.39	18.57	18.91	18.57	19.65	18.62	18.76	18.56	19.72	18.28	18.36	18.93	18.27	19.29	18.75	18.75	18.37	19.21	18.54	18.21	19.57	18.83	18.5	19.27	18.81	18.77	18.51	18.49	18.19	18.94	19.9	18.34	19.56	19
1/P08962						14.77	14.93			14.35	15.6				16.6						14.84										14.94		14.44					15.41	14.95		14.68				14.97	15.44
1/P09001				15.48	15.24	15.32		15.23			15.57																					15.15
1/P09012				15.73	16.45			16.08	16.5				17.87		16.39					16.46	15.68			15.95						17.12		15.43	15.65			16.49			15.64	15.16	15.41		14.8	15.51	15.91	16.38		15.22
1/P09038
1/P09086						17.37																																				16.58
1/P09093	15.69
1/P09104	18.27	18.59	19.28	20.32	19.04		17.98	18.65	19.8	18.65	18.69	18.59	18.93	18.97	19.16	18.28	18.99	20.17	18.53	19.47		18.61	18.63	18.6	18.46	18.8	19.33	18.21	18.45	18.56	19.38	20.44	19.99	18.81	18.97	18.68	18.46	19	19.9	19.08	19.34	18.72	19.27	18.86	20.59	19.82	18.38	18.53	18.17
1/P09110	18.16	17.41	15.17	16.37	15.21	14.5	14.58	17.76	17.02	17.29	14.65	17.9	18.61	17.93	13.83	19.17	17.51	14.51	17.13	15.39	14.11	17.37	19.14	14.84	17	19.28	16.49	16.9	16.23	16.67	15.5	14.72	14.17	16.86	18.49	16.95	17.24	14.62	14.33	15.9	15.4	16.87	19.48	17.45	14.73	16.33	18.3	19.11	18.82
1/P09132	15.47			15.47	15.23				15.61
1/P09211	16.26	16	14.6		15.18	19.19	19.19	16.03	18.4	16.15	19.97	15.15	15.84	15.82	19.21	16.07	17.21	21.21	15.6	16.84	17.11	16.13	16.04	15.56	16.01	15.55	15.91	15.47	15.96	16.28	18.13	16.09	18.06	16.22	15.52	15.41	16.22	18.29	18.09	16.38	18.08	16.2	15.67	15.9	16.35	15.62	15.66	16.08	15.4
1/P09234			15.84	15.75	15.83			15.12										15.85		15.52												14.97	15.04	14.74		15.97										16.06
1/P09327	15.15	14.67				16.7	17.81			15.03	16.55			15.3	15.99	16.12	14.82	15.52		17.52		15.14		17.12	14.91	14.76	15.71	14.97		14.99		15.81			14.86	17.87	15.42							15.22	13.95				14.72
1/P09382	16.26	18.42	18.74	16.6	19.1	18.74	19.57	18.7	18	16.87	18.51	17.79	17.53	18.26	18.85	17.45	18.48	19.75	18.35	19.27	19.44	16.94	18.74	17.26	17.26	18.31	17.92	18.25	18.66	17.02	19.58	19.38	19.96	19.7	17.92	18.13	17.95	19.76	20.11	19.87	19.57	19.6	18.61	18.62	19.88	19.31	18.05	18.61	17.97
1/P09417	17.77	18.31	16.77	19.19	16.68	16.39	15.73	17.03	17.66	18.43	17.04	18.73	18.2	18.66	16.43	17.73	18.41	16.68	18.35	17.19	16.12	18.43	18.87	16.83	18.16	18.96	17.5	18.42	18.05	18.49	16.58	16.15	16.69	17.36	18.78	16.74	18.02	16.51	16.68	17.57	16.48	17.27	18.76	18.89	16.98	17.15	18.25	18.13	18.21
1/P09429		14.45	14.42	15.21	14.76	14.69		14.45			14.48	13.69	13.99	14.41	14.77	14.04	14.56	15.24	14.12	15.59			14.03	14.76			15.22	14.11	14.23	13.85		14.54	14.95	14.01	14.05	15.01	14.61		14.84	13.9	14.42	14.27	14.07	14.33	14.86	14.57
1/P09455	15.45	15.57				15.25		15.46	15.71	15.57	15.85	15.88	15.79	15.55		16.46	16.36	16.02	15.71	15.69	14.81	15.48	15.58		15.94	15.71		15.47		15.29	16.68		14.89		15.39	16.84	15.71	16.49	15.16		16.47		15.9	15.87			15.64	15.69
1/P09467	18.5	18.96	19.28	18.68	19.57	15.34	15.42	17.44	17.14	18.89	16.09	19.52	19.55	19.99	16.11	18.63	19.61	15.53	19.52	16.67	15.14	18.95	19.54	17.57	17.86	19.34	18.59	19.25	18.19	18.95	15.96	14.81	16.49	17.3	20.51	16.86	18.6	15.93	16.3	17.35	16.02	17.29	19.75	20.04	16.82	15.65	19.53	18.91	19.15
1/P09471													16.73												13.32				16.42	16.61						16.23										15.09		14.14
1/P09486																		15.36			15.48											15.41													15.29
1/P09488	15.73	17.64	16.02	16.64	16.31			15.28		16.22		19.11	17			17.62		15.41	16.59	15.09		15.96		15.19						15.7				16.25				16.49		14.81		14.84	15.23		15.36			17.46	18.11
1/P09493	15.86	17.24	16.64	16.13	16.19	18.43	16.99	17.09	16.62	16.34	17.25	16.2	16.52	16.53	18.09	16.5	17.49	18.03	16.47	18.98	20.1	16.4	16.27	18.66	16.87	15.69	17.27	15.9	17.67	17.32	18.09	19.68	18.57	18.12	16.52	16.74	17.42	19.89	18.63	18.01	17.87	18.18	16.62	16.43	18.94	16.71	16.09	16.6	16.42
1/P09496		16.52	17.18	17.04	17.18	16.04	16.81	17.08			16.63		15.88	16.31	17.05	15.63		16.49	16.32	17.13	16.36	16.32	16.03	17.05	15.89		16.51		16.64	16.44	16.4	16.26	16.51	16.25	15.81	16.74	16.3	16.48	16.55	16.02	16.41	15.83	16.02	16.3	16.47	17.78
1/P09497	15.33	15.31	16.49		15.87			15.96	15.73	15.52					16.18			16.51	15.3				15.29	16.67			15.64	15.22	15.68			16.11			15.31	16.33	15.45						15.59			15.89		15.38	15.51
1/P09525	15.79	16.95	16.49	16.17	16.6	17.18	19.5	17.12	17.4	16.56	17.88	17	16.02	17.48	20.54	17	17.38	18.77	16.55	19.3	16.14	16.61	16.84	16.98	17.61	16.6	17.86	16.16	17.09	17.02	16.73	17.93	16.96	17.11	16.22	17.84	16.51	17.35	16.82	17.94	16.63	17.11	16.32	16.79	17.66	18.02	16.76	16.42	16.5
1/P09543		16.12		16.78	16.54			16.66			16.28			16.32	17.14	16.09	16.36	16.66		17.42	16.02	16.12	15.63	16.63	16.02		16.6	16.09	15.92	16.27	16.05	15.93	15.99			16.5	16.25	16.01	16		15.98			15.82	15.9	17.43			16.27
1/P09601	15.34	15.35							15.27	15.85		15.14	15.83	15.48			15.72		15.41			15.68						15.73		15.65	15.42				15.67		15.62	15.89			15.42		15.46	15.07	15.57	15.45		15.33
1/P09619																		15.48
1/P09622	17.2	18	16.94	18.63	17.72	17.49	15.93	18.13	17.02	17.82	17.21	17.46	17.47	18.07	17.74	17.44	17.82	17.89	17.92	17.78	16.69	17.91	18.16	18.73	16.76	17.62	17.6	18.28	17.87	18.2	16.9	16.79	17.45	17.91	17.9	17.61	18.35	16.57	17.08	18.61	17.05	17.78	17.14	18.3	17.71	17.19	17.96	18	18.01
1/P09651	15.37	15.31	17.67	17.75	18.14	16.1	16.83	16.31	17.51	15.94	16.5	15.02	15.15	15.17	17.12	15.29	15.85	17.37	15.37	17.47	15.52	15.78	15.44	16.85	15.11	15.65	15.86	15.34	16.12	15.63	16.85	17.15	16.57	15.86	15.3	16.9	15.79	15.82	16.61	15.81	16.41	15.81	15.71	15.83	17.49	17.52	15.22	15.95	15.53
1/P09661		15.43	15.99	16.03	15.93	15.29	15.02	15.76	15.3	15.27	15.58				16.61		15.19	15.4	15.13	16.17	15.14			15.64	14.76		15.95		15.56	15.2	15.09	14.99	15.46		14.59	16.12		14.7	15.83		15.23			15.11	15.78	16.2	15.36	15.23	15.25
1/P09668		16.22				15.46			16.04	16.53		15.96			19.46			16.84		16.58		16.56					17.2		16.84	16.87		18.06	16.63	15.9	16.07	16.83				15.86		16.18	15.55	16.27	16.42
1/P09669	19.32	19.55	19.09	20.65	18.99	18.55	19.04	20.04	19	18.98	18.66	18.33	18.21	19.59	18.72	19.62	18.9	17.26	19.17	18.77	17.7	18.9	19.24	20.92	18.27	18.77	19.56	19.09	19.36	19.05	18.21	18.02	18.61	18.59	19.03	18.99	19.32	18.15	18.55	18.52	17.87	18.35	18.86	18.84	18.4	19.57	19.13	20.52	19.59
1/P09758															17.27			16.02
1/P09769										16.67												16.08
1/P09848
1/P09871	15.19	15.67	15.63	15.06	15.53	15.07	16.92	15.03	14.99	15	16.62	14.56	15.32	15.89	17.98	15	15.47	15.86	15.06	15.72	16.3		15.55	15.5	15.41	14.61	15.84		15.41	15.04	16.1	15.54	15.95	15.83		16.16	14.84	15.6	15.81	16.25	16.12	15.68	15.27	15.12	15.84			16	15.77
1/P09874	15.44	15.54	17.63	16.61	17.9	15.7	15.78	16.66	18.37	15.47	15.76	14.58	15.17	15.53	17.01	15.66	15.79	16.04	15.09	17.16	15.65	15.67	15.42	16.64	15.69	14.84	17.38	15.15	15.86	15.45	15.59	15.9	16.67	16.13		16.56	15.5	15.14	16.7	16.42	15.76	16.05	15.29	15.49	17.13	17.4	15.42	15.86	15.5
1/P09884
1/P09913																																														17.16
1/P09914
1/P09917							14.91		15.44
1/P09923
1/P09936											15.77							16			15.34												17.25					15.84	17.39		15.85	15.63
1/P09960	15.19	15.53	15.28	15.49	15.74	15.04	15.24	15.43	17.22	15.65	15.24	15.2	15.25	15.04	15.71	15.28	15.84	16.81	15.48	16.2	14.77	15.62	15.62	14.42	15.28	15.35	16.38	15.52	16.08	15.45	15.72	15.02	16.19	15.52	15.36	16.09	14.98	15.42	16.2	15.55	15.56	15.7	15.45	15.69	15.48	14.31	15.43	15.46	15.11
1/P09972	15.74	16.38	16.26	17.28	17.2	15.26		15.15	16.12	16.4	15.85	15.92	15.79	15.53	15.6	15.71	15.76	15.25	15.42	15.71		16.37	16.05		15.53	15.74	15.97	16.14	14.86	16.25	15.33	14.72	15.26		15.93		15.41	15.21	15.34	15.03		15.13	15.46	16.77	16.83	15.53	15.42	16.24	15.76
1/P0C024		14.1																					14.18			13.76	13.78	13.71	14.07														14.25					13.84
1/P0C0L4	16.33	16.1				15.86	17.77	15.3		16.16	16.54	14.52	15.59	14.81	17.75	14.78	15.94		15.31	15.57	15.89	16.07		14.85	15.7		16.18	14.69	16.29	16.07	15.91	16.35	16.64	16.46			15.34	14.75	15.11		15.91	16.46	15.01		17.21	16.17		16.23	15.21
1/P0C0L5	16.67	17.01	16.27	16.81	16.22	17.02	18.4	16.6	15.84	16.88	17.41		16.79		19.11	16.48	16.63		16.86	16.22	17.47	16.89		15.98	16.64		16.66		16.66	16.97	17.24	17.21	17.03	17.1	16.04	17.04	16.79	16.85	17.19	17.14	17.22	17.13		16.19	17.25	16.92		16.78	16.62
1/P0C263
1/P0C2W1	15.9									15.51				15.68																	16.24																		15.58
1/P0C7P0
1/P0C7P4
1/P0C7T5																																														16
1/P0C7V8						16.73									16.02						17.02												16.2						16.07	16.55	15.81
1/P0C870																															14.36
1/P0CG40			16.38	16.75	16.66				17.21			15.97						17.06		17.06																18.14						15.54
1/P0DJ07																				16.69
1/P0DJI8		17.56	17.52																																									17.21				16.09
1/P0DJI9																		15.63
1/P10109	15.16	15.64			14.93			15.47	14.99	15.51			15.26	15.09		14.79			14.99	15.67		15.48	15.7	15.54	14.57		15.77	15.25	15.58	15.5				14.8	15.31	15.46	15.25			15.21			15.53	15.27		15.17	15.09	15.61	15
1/P10114											13.76
1/P10153		16.37				15.52						15.78		15.94		15.52	16.14		15.65		16.49	15.74	15.57			15.72		15.02	15.51	15.98	17.45				15.48	16.71	14.79	17.72			17.38		15.71	15.9			15.68		15.55
1/P10155	14.8	15.08	15.41		15.62	15.29		15.35	16.28	15.13	15.42	14.86	14.8	14.82	16.49		15.26	16.23	15	16.26	14.65	15.3	14.82	15.58		14.94	15.36	14.92	15.48	15.06	15.1	15.91	15.21		14.72	15.99	15.07	14.8	15.14			14.76	14.9	15.15	15.5	15.67		15.22	14.62
1/P10176																							14.25
1/P10253	15.59	15.43	14.99	14.81	15.35	14.99	14.62	15.56	15.12	15.59	14.35	15.1	15.78	15.57	17.06	15.2	15.14	14.99	15.8	14.68		15.64	16.01	15.01	14.68	15.63	15.7	15.12	18.55	15.65	15.12	15.16	15.4	15.23	15.34	16.46	15.46	14.82	15.29	14.94	14.76	15.01	16.31	15.51	14.67	15.68	15.73	15.56	15.34
1/P10275
1/P10301		17.01				16.55	17.45		15.41		17.17				16.21		16.05	16.46		15.6	16.35										16.54	16.01	16.57	15.63			15.16	16.26	16.46	16.01	16.5	15.58			15.86	16.15
1/P10398
1/P10412				13.74	13.45													13.98		15.36														14.62		16.51					14.94
1/P10415	15.53	16.05													16.82					16.27		15.57	15.23	16.49	15.22			15.38	16.39					15.69		15.68					15.57					15.76	15.36
1/P10451
1/P10515	15.59	15.9	14.99	15.91	15.5	16.17	15.09	16.37	15.22	15.32	16.36	14.9	15.54	15.95	15.34	15.9	15.4	15.08	15.13	15.11	14.55	15.41	15.56	15.3	15.04	15.18	16.28	15.4	14.96	15.48	14.94	15.18	15.57	15.31	16.18	16.01	15.43	15.48	15.63	15.52	14.98	15.49	15.61	15.32	15.37	15.69	15.32	16.2	15.41
1/P10586			16.1		15.93										17.34																					15.99										16.05
1/P10599	19.86	20	21.41	20.03	21.62	19.3	17.23	20.55	19.57	20.41	20.03	18.89	19.31	19.13	20.35	18.24	19.88	18.83	18.99	20.69	17.82	20.54	19.32	19.56	18.58	19.99	22.9	19.22	19.84	20.31	19	19.32	19.35	19.62	19.34	22.04	19.67	19.05	19.63	19.56	18.75	19.49	20.69	19.67	20.4	20.37	18.87	19.86	18.93
1/P10606	18.04	18.49	18.91		18.63	17.56	18.01	19.02	18.16	18.02	17.51	17.44	18.48	17.71	17.69	18.33	17.75	17.25	17.97	18.08	16.72	17.92	18.07	18.98	17.55	17.82	18.87	18.35	18.59	18.1	17.28	17.8	17.47	17.63	18.41	18.2	18.19	16.71	17.35	17.58	17.45	17.57	18.65	17.93	17.43	18.96	18.28	18.94	18.28
1/P10619	15.57	15.86	15.67	15.6	15.68	15.53		16.58	15.35	16.18	15.28	15.07	14.66	15.43	16.65	15.08	15.45	14.85	15.33	16.1	15.26	16.21	15.39	15.78	15.08	15.15	16.44	15.29	16.94	16.43	16.12	15.23	16.06	16.01	15.23	17.21	15.97	15.48	16.27	16.37	16.02	16.08	15.28	15.69	16.84	18.38	15.69	15.68	15.76
1/P10620	17.95	17.4	16.62	17.12	17.66		16.41	16.69	16.7	17.96	15.51	18.94	16.74	17.82	15.69	17.6	16.34	16.54	17.31	16.56		17.92	17.52	16.17	17.17	17.57	17.3	17.11	16.81	17.62	16.37		15.95	16.95	17.22		17.26	17.21	16.26	17.23	15.87	17.05	17.39	17.11	16.39	16.75	17.87	16.83	17.5
1/P10636				16.82																								16.43																16.06
1/P10643						15.34	18.08		14.51		17.16		15.07			15.52	15.55			15.98	16.09				15.62						16.55	15.63						16.16			16.31				15.92
1/P10644	14.98	15.27	15.2	16.31	16.15		14.71	15.81	16.38	15.15		14.78	15.29	14.78	15.4	15.85	15.3	16	14.97	15.23	15.06	15.21	15.42	15.34	15.02	15.21	15.4	15.55	15.66	15.03	15.45	15.17	15.22	15.68	15.3	14.89	14.46	15.24	15.1	15.77	15.33	15.58	15.29	15.65	16.22	16.14	15.21	15.64	15.04
1/P10645	17.13	16.76																															16.4
1/P10746
1/P10768	16.89	17.25	16.52	17.94	17.24	17.02	16.55	16.14	17.77	17.49	17.41	17.27	17.15	17.16	16.26	17.03	17.73	17.16	17.14	17.73	16.24	17.38	17.43	17.1	17.06	17.57	18.34	17.66	17.42	17.15	16.95	16.27	16.71	16.49	17.57	17.41	17.19	16.89	16.69	16.34	17.01	16.38	17.4	17.89	16.77	16.36	17.17	17.31	16.95
1/P10809	19.28	19.53	18.62	20.23	18.9	18.93	18.62	19.94	18.04	19.45	19.68	18.64	18.27	19.16	19.16	18.53	18.88	20.02	19.25	20.29	16.51	19.43	19.4	18.88	18.76	18.97	20	18.58	19.38	19.48	17.74	17.68	18.97	19.28	18.65	19.27	19.48	17.41	19.05	19.67	17.48	19.12	19.07	18.99	18.31	18.71	19.43	19.33	19.24
1/P10909	16.32	16.33	19.93	16.68	18.18	17.06	20.36	17.2	15.51	15.94	18.76	16.29	15.33	16.85	18.75	16.81	17.05	16.33	15.95	17.83	17.26	15.86	16.14	16.55	17.11	15.65	17.26	15.56	15.86	16.04	17.48	17.95	18.17	16.93	15.01	17.01	15.92	16.05	18.07	18.2	17.49	17.09	15.69	16.18	19.6	15.79	15.95	16.57	16.08
1/P10915																				15.47
1/P11021	20.13	20.24	20.43	20	20.83	18.63	18.59	20.06	18.5	19.52	18.83	18.63	19.3	18.18	21.63	19.12	19.09	19.07	18.71	21.05	18.61	19.39	18.77	21.04	18.69	18.85	20.82	18.68	20.74	19.51	19.12	19.3	19.11	19.51	18.44	20.31	20.07	18.19	20.14	19.48	19.03	19.59	18.97	18.91	20.08	19.81	19.16	20.43	20.37
1/P11047		14.8	15.43	15.36	15.19	17.21	14.57	16.01	15.6	15.13	17.03		14.64	15.35	16.78	15.22	15.85	18.35		15.98	17.43			17	15.14		16.11	14.99	15.07	15.05	17.83	18.04	16.56	16.7		16.52	15.23	16.03	16.64	16.72	17.58	16.7			18.29	16.06		15.33
1/P11117		15.76	15.78	15.55	15.42	15.13		15.27		15.49				15.88	15.94				15.17	15.57		15.7	15.92			15.22	15.28		15.1	15.76			15		15.5									15.37	15.23	15.8	15.65	15.41	15.81
1/P11137											14.89				15.06
1/P11142	17.52	17.84	18.39	18.69	18.76	18.28	18.9	18.37	18.82	17.72	18.31	17.47	17.68	17.62	19.13	17.27	17.77	18.66	17.38	19.4	17.64	17.61	17.71	18.75	17.59	17.48	18.74	17.8	18.55	17.58	18.24	18.61	18.6	18.53	17.43	18.8	17.6	17.87	18.64	18.37	18.13	18.4	17.72	17.48	18.57	18.11	17.45	18.39	17.39
1/P11166						16.61	16.9				18.02										15.41		15.95								15.9							17.1			15.88				15.1
1/P11171	16.04	16.32	15.74		16.17	17.82	17.34	17.11	18.86	16.52	19.05			15.94	17.33	15.46	16.21	16.64	15.67	17.69	16.6			16.86	15.54		17.33	15.84	16.58		17.48		17.98	16.32		17		16.7	18.08	16.99	17.43		15.49		17.87	16.75	15.94	16.61	15.69
1/P11172		14.99	15.6	15.36	15.51	14.57	15.12	15.26		15.05		14.94		15.18	16.06	14.67			14.86	15.62		14.88	15.2		15.03	15.13	15.78			14.76			15.13			15.76	15.13			15.07			14.84	15.09	15.42	15.27		14.92	14.87
1/P11177	16.35	16.56	15.84	17.6	16.19	17.14	16.44	17.02	16.67	16.21	17.33	16	16.44	16.35	16.86	16.26	16.58	16.84	15.96	16.6	16.44	16.14	16.09	16.82	16.16	16.03	17.15	16.62	16.24	16.47	16.62	16.72	16.97	16.64	16.55	17.57	16.56	15.96	16.82	16.89	16.59	16.79	16.15	16.18	16.79	16.96	15.7	17.14	15.95
1/P11182	15.58	15.96	15.32	15.63	15.38	14.24	14.15	15.35	14.4	15.94	14.64	15.79	15.38	15.95	14.33	16.12	15.33	15.69	15.53	14.77		15.86	16.11	15.58	15.54	15.63	14.23	16.19	14.85	16.09	14.82		14.09	14.6	15.83	14.62	15.97		14.29	14.46	14.47	13.97	15.2	15.77	14.28	15.02	16.08	15.88	16.26
1/P11215	16.42	15.5						15.92						15.97	15.9								16.59		16	16.17			16.18		17.96								16.11					16.44				15.28	16
1/P11216	15.65	16.02	15.77	15.66	15.92	18.91	16.09	15.86	16.66	16.26	20.22	15.93	15.98	16.32	16.57	15.79	16.22	16.38	16.22	16.79	15.96	15.98	15.75	16.74	15.91	15.9	16.33	15.88	16.29	16.07	16.13	16.34	16.37		15.97	16.27	15.62	16.25	16.12	15.68	15.87	15.86	15.69	16.25	16.49	15.89	15.58	15.99	15.96
1/P11217	14.44					17.03		14.27	14.48	14.67	18.15		15.03	14.55	14.77		15.09	14.96		15.18		14.31		14.94			14.99		15	14.13			14.79		14.91	14.47			14.45		14.41			14.45	14.62			14.39
1/P11226	15.43	15.94	15.36		15.27			16		15.51		15.51	15.35	16.35		16.71			16.32			15.39	17.03	16.22		17.34		16.17	15.79	15.42					15.38		14.88						17.07	16.07			16.84	16.01	16.42
1/P11233			16.55	15.9	16.24	15.96	15.27	15.69	15.5		16.26		15.83	16.22			15.92	15.98	15.62	16.25	15.08			16.04						16.14	15.47	15.42	15.32	15.56		16.14	16.03	15.4	15.36		15.6				15.35	17.24	15.74	15.99
1/P11234						16.69	16.02			15.94	16.97	15.5			16.8			16.04	16			15.99					16.28	15.84	16.82	16.31						17.55	16.21			16.23							15.96	16.37	16.16
1/P11274	16.74	16.23				17.9	18.09	16.43						16.35			17.26				17.79		17.04		16.47	16.6	15.82				18.25					16.78		18.76	17.06		18.39			16.97				15.78	16.64
1/P11277	15.12	15.08	15.38	15.71	15.48		15.61	15.32		15.26	15.27	15.11		15.37	15.29	15.3	15.69	16.07		16.12	15.27	15.11	14.93	15.61	15.3	15.16	15.59		15.09	15.14			15.1		15.4	15.97	15.35		15.29				15.3	15.38		15.85	15.1	15.33	14.85
1/P11279	16.64	15.72	15.38	15.63	15.86			15.76	16.22	16.38	14.93	14.91	15.78	15.52	16.8	16.22	16.05	15.7	15.2	15.36	15.86	16.31	16.08	16.95	15.64	16.03	16.3	16.42	16.05	16.18	16.42	15.66	15.28	15.36	15.59	15.97	16.18	15.48	15.57	15.55	16.38	15.41	16.25	15.88	16.2	16.3	15.74	16.52	15.63
1/P11308																																15.56
1/P11310	18.71	18.94	18.56	18.48	18	15.97	16.06	18.93	17.57	18.89	16.13	19.21	19.25	19.25	16.41	18.65	19.43	17.05	19.07	16.5	15.92	18.94	19.97	18.25	18.84	19.29	17.44	18.62	18.78	18.87	17.36	14.88	17.01	18.09	20.36	16.85	19.76	17.17	17.18	18.71	17.43	18.12	19.57	19.4	17.92	19.14	19.92	19.21	19.8
1/P11387	16.54		17.51				18.49	18	19.4	17.09	18.21	16.83		17.2	16.98			19.01	16.92	18.42				18.27	16.58	16.86			17.02	16.77	18.57	18.75	18	17.82		18.59	17.38	18.74	18.16	17.5		18.09	17.17		18.25	14.97	16.89	17.33
1/P11388			16.47																							14.96																			15.83
1/P11413			15.96	16.37	16.94	16.46	17.69	15.75	16.77	15.38	16.89				16.57		15.72	15.85		15.56	16.16	15.5		15.36			16.65		15.48	15.38	16.86	16.1	17.57	16.06		15.86		16.12	17.29	16.26	16.69	15.87		15.28	17.28	17.1		15.71
1/P11441					17.48					16.73		16.5		16.97		16.16						16.38	16.77	17						16.57							16.75									17.1			16.37
1/P11498	18.97	20.04	17.26	18.28	17.1	15.07	15.28	18.31	15.91	19.91	15.51	18.26	17.46	18.69	15.56	18.47	18.39	15.12	18.66	15.94		19.08	19.07	16.25	18.73	18.63	17.88	17.15	18.11	19.29	15.85		16.27	16.25	17.58	15.91	20.54	16.61	16.35	17.3	16.01	16.25	18.29	17.95	15.76	18.04	18.72	19.61	19.76
1/P11532	16.05	16.84													16.06		16.07		15.87	16.67																													16.29
1/P11586	18.28	18.98	16.68	18.61	17.31	15.83	16.66	17.22	17.36	18.27	16.48	18.18	18.4	18.97	15.13	19.2	18.27	15.45	18.37	16.76	15.18	18.2	18.62	17.67	18.37	18.77	16.46	19.03	17.61	18.35	15.85	15.37	15.91	17.36	18.53	16.69	18.06	16.19	16.12	17.16	16.07	17.21	18.57	18.85	17.18	17.72	18.72	18.97	18.96
1/P11678	16.72	15.95		15.93						16.47		16.19	16.56	16.77		17.71	15.44		16.93		16.07	16.47	16.38			16.13		16.43		16.42	16.12					16.92	16.81	15.54			16.15		16.32	14.73	14.78		16.3	15.77	16.51
1/P11717			14.9	14.9	15.28	14.92					14.39													14.77			14.37				14.11
1/P11766	17.72	18.36	17.16	18.8	17.67	17.6	17.31	17.6	18.4	18.64	17.95	18.65	18.75	19.08	18.46	17.38	18.25	16.91	18.4	19.57	16.76	18.73	18.81	17.36	17.5	18.47	19.17	18.96	19.13	18.43	17.7	17.18	17.7	17.32	18.93	18.47	18.13	17.82	17.79	18.16	18.02	17.63	18.63	18.7	17.54	19.59	18.59	17.99	18.54
1/P11802																											16.48		16.39
1/P11908												16.16			16.48							15.92				16.14	16.52		16.09	15.9														16.16
1/P11940	16.51	16.58	17.21	17.81	17.12	16.54	16.82	17.34	17	16.34	16.49	16.02	16.95	16.64	17.33	16.8	16.44	17.23	16.48	17.45	16.39	16.03	16.17	17.23	16.38	16.04	17.31	16.34	16.99	16.26	16.43	16.8	16.91	16.89	16.38	17.64	16.38	16.15	17.03	16.7	16.56	16.78	16.56	16.41	17	16.5	16.18	16.84	16.65
1/P12004			19.1	18.43	19.3	15.13	16.78		16.5		15.99				15.88			16.17		16.59							15.84					15.32	15.04			16.04			15.49		15.16		14.57		17.01	16.37
1/P12035											19.59				19.51			15.84												18.17																		17.8
1/P12074														15.85
1/P12081		15.1	15.48	15.2	15.73	14.79		15.09	15.46		14.81	14.52			15.44			15.19	14.86	15.72	14.71	14.83					15.26		15.36		14.44	15.01	15	15.03	15.17				15.28	14.75	15.01		14.94	14.91	15.48
1/P12109	19.04	18.75	17.81	16.98	17.58	21.19	18.19	20.77	20.6	19.16	20.3	18.65	18.24	18.94	20.29	19.13	20.59	20.43	18.81	20.33	22.14	19.07	19.05	20.58	19.5	18.14	19.29	18.4	18.87	19.71	21.93	20.2	22	21	18.28	21.74	19.52	21.5	21.95	21.99	21.83	20.73	18.23	19.19	23.43	18.47	18.76	19.53	18.68
1/P12110	17.57	16.66	16.12	15.39	16.36	19.8	16.94	19.18	19.71	17.19	18.73	16.41	16.68	17.28	18.57	17.92	19.33	19.35	17.34	18.7	20.69	17.26	17.09	18.72	17.64	16.36	18.42	16.46	17.24	17.69	20.52	19.54	20.26	19.97	16.29	20.38	17.89	20.24	20.41	20.35	20.6	19.97	16.87	17.21	22.1	17.06	16.96	17.69	16.47
1/P12111	17.1	17.52	17.45	16.19	17.2	20.06	17.18	19.6	18.42	18.08	19.24	17.32	16.89	17.81	19	17.56	19.08	18.57	17.55	19.11	21.11	18.06	17.87	18.44	18.42	16.91	17.87	16.6	17.78	18.18	20.5	18.58	20.42	19.3	16.9	20.06	18.12	20.51	20.46	20.35	20.59	19.48	16.73	17.72	22.03	18.35	17.68	17.72	17.46
1/P12235	15.92	16.22	16.13	16.45	16.04		15.71	15.95	15.6	15.96		15.79	16.52	16.23	15.88	15.72	15.12	16.26	15.39	15.84		16.02	16	15.98	15.75	15.69	15.63	15.97	15.77	16.07	15.42	15.65		15.73	16.33		16.35						16.02	15.84		15.88	15.94	16.14	16.23
1/P12236		15.59	14.9	16.5	15.17	17.32	15.46	15.86	16.15		17.64			15.22	16.01		15.77	17.58	15	16.45	15.65			16.31			16.01		15.61		16.27	16.55	15.91	15.44		15.66		14.95	16.04	15.16	16.48	15.42			16.52	16.5
1/P12259			14.88		15.09										14.73					15.12				14.07			14.44									14.44
1/P12268		14.45	14.37	15.2	14.55	14.8	17.3	15.29	15.69	14.57	14.54	14.51	14.37	14.58	14.82	14.39	16	15.87	14.79	16.3	14.5	14.53	14.67	15.87	15.71	14.62	15.23	14.63	15.15	14.82	15.45	14.78	15.25	15.13	14.43	16	14.92	14.2	15.16	15.28	14.92	15.23	14.8	14.78	15.61	16.39	14.83	14.62	14.42
1/P12270	14.29		14.68	14.51	15.05	14.19		14.84	15.02	14.14	14.71				14.97		14.69	14.69	14.14	15.24		14.4		15.09			14.79			14.16		14.17	14.74			15.25			14.73						15.02	15.5		14.22
1/P12273																																														16.03
1/P12277						18.32					20					15.14	15.28				15.14										15.29	16.2					14.72	15.54			15.42	14.43			14.49
1/P12429		18.03	17.69	17.3	17.43	18.18	18.47	17.7	16.99	17.52	18.89	17.8		18.43	18.28	17.52	17.24	16.64	17.89	17.54	16.42	17.28	17.54	18.16	17.38	17.42	18.09	16.67	15.49	17.63	17.2	15.95	17.67	16.09		16.31	17.52	17.04	17.46	17.19	17.16		17.26	17.79	17.7	18.75	17.73	17.04	17.68
1/P12532								16.2			19.48
1/P12694	15.44	15.28	14.56	15.14	14.84			15.08	14.61	15.36	14.82	15.26	15.16	15.36		15.94	15.29	14.67	15.4			15.32	15.56	14.81	14.94	15.34		15.3	14.88	15.51				14.91	15.51		15.45			14.26		14.52	15.67	15.44		14.63	15.6	15.52	16.03
1/P12724	17.37	15.91				15.94	17.7	15.82			16.27	16.1		16.08			16.26			15.6	16.35	16.37					16.29		15.91		16.87					16.4		16.53		15.83	16.82			16.24	16.19			16.12
1/P12814	15.42	15.32	14.41	14.4	14.77	16.3	14.53	15.55	15.44	15.85	16.05	14.99	15.04	14.94	16.07	14.99	15.75	17.37	14.93	15.77	16.4	15.55	15.13	15.24	15.23	15.19	15.33	15.23	15.63	15.7	17.59	16.72	16.13	15.59	15.05	15.95	15.38	16.76	16.22	15.91	17.1	15.63	14.98	14.86	16.68	15.59	14.79	15.41	15
1/P12821																																															16.98
1/P12829
1/P12830	16.14			15.78	15.25	15.23		15.56			15.61		15.72	15.31	15.9	15.81	15.94			15.73		15.42		16.34		15.25	15.61	15.53		15.04		15.35			15.52	16.56	15.55					14.95	15.71	15.48		15.78	15.44	16.05	15.45
1/P12931						15.17	15.57	14.3		14.17	15.58				14.71					15.33											14.8		13.72			14.59									14.52
1/P12955	15.07	16.4	15.5	15.75	15.82	15.24		15.37	15.47	15.47		15.67	16.01	15.53	15.71	15.44	14.89	15.14	15.36			15.6	15.63		14.81	15.44	16.31	15.52	14.99	15.28	14.85	15.04	15.58	14.99	16.07	15.24	15.01	15.09	15.68	14.82	15.09	14.61	15.77	16.11	15.6	16.2	15.35	16.35	15.23
1/P12956	16.43	16.56	16.13	17.63	16.88	16.89	17.74	17.33	17.41	16.87	17.18	15.97	15.87	17.25	18.15	16.51	16.87	17.2	16.74	18.33	16.57	16.83	16.46	17.65	16.19	16.04	16.87	16	16.75	16.71	17.11	16.76	17.46	15.98	16	17.72	16.74	17.09	17.47	16.68	16.99	15.94	16.33	16.36	17.06	17.47	16.88	16.34	16.09
1/P13010	16.97	16.8	16.8	18.49	17.38	17.5	18.52	17.99	19.33	16.97	17.58	16.19	16.4	16.24	19.19	16.53	16.92	18.57	16.59	19.02	17.35	16.82	16.59	18.62	16.5	16.39	18.01	16.41	17.12	17.11	17.85	17.85	17.98	17.11	16.45	19.17	16.83	17.18	17.95	17.45	17.85	17.28	16.11	16.6	17.87	18.3	16.01	17.06	16.21
1/P13051																					18.47
1/P13073	18.05	18.93	18.04	19.4	18.2	18.13	18.09	18.87	17.73	18.36	18.57	18.11	17.59	18.68	17.97	18.41	17.62	16.46	17.99	18.3	16.79	18.61	18.3	19.22	17.68	18.09	18.8	18.11	18.74	18.42	17.21	17	17.64	16.76	18.19	17.66	18.35	17.15	17.61	17.4	17.21	17.01	17.59	18.19	17.8	19.07	18.33	19.07	18.38
1/P13224															15.93
1/P13284					16.69			15.96												15.99			15.49		15.14		15.87					15.64		16.17		16.51				16.06	15.69	16.46	15.38	15.31	18.1
1/P13473	16.17	16.53	16.45		16.77	16.54	14.94	16.57	15.81	16.81	16.53	15.81	15.41	15.67	20.26	15.43	15.71	15.98	15.48	17.58	15.64	16.84	16.31	16.08	15.31	15.82	16.36	15.16	18.37	16.83	17.34	15.29	16.01	15.63	15.49	17.04	15.99	16.05	16.21	16.36	16.27	15.02	15.87	16.42	16.26	18.39	16.19	16.24	16.23
1/P13489	16.53	17.25	17.67	17.32	17.87	17.06	17.49	17.32	18.02	16.69	16.67	17.2	16.77	17.12	17.48	17.73	17.37	18.09	16.82	17.41	17.22	16.74	17.03	16.94	17.04	16.93	17.26	17.01	16.89	16.73	18.04	18.11	18.37	16.73	16.72	18.04	17.24	18.17	18.42	17.3	18.19	16.88	17.25	17.12	17.23	17.72	16.78	17.57	16.69
1/P13521		15.88								15.12										15.96																							15.55				15.3	15.86
1/P13591																				15.98
1/P13598
1/P13611						19.9	16.9	17.24	15.62		18.38				18.16			20.83		17.17	18.46			16.74		17.66					18.07	19.9	20.17	19.39				17.19	20.21	19.35	17.82	19.17			18.63	15.55
1/P13612																																													13.52
1/P13637
1/P13639	18.76	19.08	19.32	20.07	19.92	19.35	20.33	19.43	20.01	18.83	20.29	18.57	18.89	18.73	19.97	18.57	18.94	20.02	18.52	20.24	18.42	18.77	18.69	19.86	18.5	18.67	19.19	18.89	19.94	18.74	19.27	19.49	19.93	19.21	18.54	19.56	19.09	18.71	19.76	19.17	19.01	19.25	18.48	18.7	20.07	20.49	18.55	19.5	18.87
1/P13645	16.4	16.22	15.79	16.49	16.82	16.96	16.44	16.14	17.21	16.42	17.42	15.83	15.88	15.99	16.57	17.64	15.9	16.88	16.43	17.45	17.61	16.47	17.56	17.2	16.55	15.59	16.66	16.46	15.37	16.15	17.04	16.57	16.08	17.41	16.35	17.94	16.27	16.22	16.57	16.74	16.41	17.11	17.16	16.15	17.26	21.43	17.81	15.97	17.86
1/P13646																																									16.11
1/P13647				15.77	15.33						15.33		14.73			15.19				15.94	16.09		15.51	15.38	15.58									15.9		16.27					14.69	15.64	15.02	15.51	15.13	21.1	15.43		16.01
1/P13667	19.2	19.32	18.66	18.58	18.89	18.04	17.35	19.11	18.06	18.87	18.13	18.16	18.84	18.38	19.96	18.67	18.65	17.46	18.63	19.83	17.02	18.99	18.37	20.02	18.76	18.48	19.28	18.32	19.93	19.09	17.75	18.35	18.31	18.46	18.02	19.48	19.24	17.28	18.43	18.26	17.79	18.46	18.5	18.37	18.89	18.6	18.46	19.78	19.42
1/P13671					16.73	15.94		17.06										17.29		17.64								17.21				16.7								16.5	16.85		16.08	16.28	16.32
1/P13674		15.11		15.87			15.45											15.62												14.85		16.01					15.32										15.16	15.4
1/P13686	15.75									15.91												16.13								16															16.14
1/P13688	15.12	14.87				18.61	16.37	15.79		15.11	19.7						14.89	15.37		16.05		15.4	14.85				16.41		16.17	15.51				15.58		16.52	15.14			15.92		15.69	15.26	15.17	14.71	16.82		14.93	15
1/P13693	15.33	16.15	16.26	16.85	16.55	15.9	15.61	16.11	15.78	15.64	16.42	15.51	16.01	16.12	16.27	15.97	15.75	16.08	16.23	16.99	15.22	15.78	15.86	15.69	15.8	15.94	16.62	15.37	16.96	15.63	15.76	15.98	16.53	15.85	16.02	16.14	16.13	15.97	16.76	15.99	16.13	15.97	16.32	16.02	16.01	15.11	15.73	15.57	15.64
1/P13716	16.96	17.4	16.18	17.15	16.81		15.53	16.16	16.44	17.22	15.38	17.82	16.64	18.03	16.79	16.94	17.65	15.75	17.72	16.92	15.62	17.24	18.12	16.37	15.9	17.15	16.78	17.15	17.15	17.22	15.97	15.32	16.43	15.83	17.62	16.3	16.89	16.72	16.14	15.63	15.52	15.81	17.32	18.56	16.12	17.1	18.11	16.63	17.76
1/P13727																																				15.83										14.41
1/P13760				15.15									15.91						15.72							15.18	17.21				17.32	17.15						17			17.1		15.62		18.54
1/P13761												15.31
1/P13796	16.12	16.62	15.16	15.57	15.42	15.79	15.62	16.35	18.6	15.8	15.94	15.68	15.82	15.4	16.14	15.74	16.26	15	15.8	16.73	16.83	15.81	16.09		15.43	15.71	16.53	15.64	17.02	16.16	16.84	15.9	17.68	16.34	16.15	15.54	16.41	17.21	17.49	16.19	17.05	16.58	15.72	16.31	16.05	15.96	15.55	16.52	15.37
1/P13797	16.09	16.36	17.69	15.89	18.1	16.22	14.62	15.68	15.47	16.4	15.82	15.34	16.45	15.82	16.56	15.91	16.27	16.99	15.49	16.1	15.63	16.29	15.82	15.28	15.72	15.96	16.88	16	16.67	16.1	16.32	17.43	16.89	16.08	16.38	15.33	15.95	16.61	16.96	16.07	16.66	16.07	16.36	16.29	16.89		15.75	16.34	15.71
1/P13798	15.74	15.98		15.81	15.1	15.51		15.43	16.14	15.98	15.82	16.08	16.06	16.02	15.25	15.25	15.97		16.02	15.92		16.13	16.33	15.13	15.17	16.25	16.51	16.31	16.19	16.19	15.32	14.81	14.87	15.82	16.35	15.52	15.4	15.36	15.19	15.68	14.76	15.61	16.55	16.41	15.58	15.51	16.05	15.99	15.62
1/P13804	18.1	18.2	16.16	17.9	17.11	16.33	17.3	17.5	17.29	18.02	16.46	17.94	18.52	17.58	17.04	17.82	17.85	16.75	18	18.29	15.74	18.13	18.69	16.79	17.74	17.9	17.97	17.68	17.5	18.2	17.51	15.37	17.1	17.59	18.27	16.71	18.92	16.94	17.36	17.22	16.26	17.14	18.18	17.71	17.39	17.32	18.6	18.36	17.6
1/P13807							14.36																	14.49
1/P13861	15.31	15.39	14.81	15.82	15.47	15.7	15.42	15.66	15.57	15.46	15.87	14.76	15.45	15.07	15.03	15.18	15.71	15.35	15.22	15.63	14.94	15.44	15.51	15.56	14.97	15.43	16.16	15.62	15.87	15.56	15.22	14.76	14.93	15.49	15.44	16.3	15.07	14.84	15.02	15.36	15.24	15.42	15.46	15.7	15.45	15.55	15.11	15.7	15.26
1/P13866																																									16.16
1/P13929	17.06	16.49							16.09	17.34		16.5	16.89	17.37		16.46	16.04		17.12			17.32	18.03		15.62	17.01		17.83		17.24				15.47	18.59					15.09		15.19	17.57	18.69	15.54		17.71	16.38	16.67
1/P13984									14.8						14.87			14.42		14.72																14.55			14.03
1/P13987					16.19	16.64	17.76	16.74						15.7	18.54	15.84			15.53	17.29	17.47	15.82	15.51	16.58	15.27		16.46		16.32			16.43	16.86	16.52	15.31	18.15	16.05			16.65	17.51	17	15.5	15.38	16.61	17
1/P13995
1/P14136																																		16.13
1/P14151	18.13																					17.7	18.31						17.31										16.63	16.93					16.69			18.12
1/P14174	17.74	18.63	18.94	18.32	18.29	18.92	18.33	18.22	19.27	18.24	18.79	17.32	19.32	17.52	19.41	18.22	18.45	20.74	16.15	20.96	18.04	18.32	18.62	19.59	17.85	16.68	17.98	17.14	18.19	18.26	18.47	20.29	19.17	20.05	18.53	19.64	17.61	18.27	19.09	19.5	18.33	20.04	17.61	18.76	20	19.2	18.62	18.71	19.38
1/P14209
1/P14314	18.07	17.74	18.14	17.91	18.27	16.7	16.25	17.82	17.62	17.81	16.92	16.78	17.5	17.4	17.59	17.5	17.4	18.11	17.18	18.01	16.41	17.63	17.5	17.63	16.87	17.59	18.09	17.51	17.95	17.86	17.02	16.79	16.93	18.02	17.12	17.87	17.57	16.76	16.84	17.51	16.94	17.85	17.38	17.21	17.15	17.68	17.33	18.11	17.9
1/P14317		14.27						14.9	18.01				14.94				15.12	14.92		15.04	15.15						14.61				14.98		16.04	14.9	14.62		14.42	15.05	16.04	15.26	15.07	14.8	14.94		15			14.68
1/P14324	15.2	16.71	15.41	19.94	16.69	14.71	14.56	16.16	15.47	15.86	15.17	16.61	16.36	16.53	16.15	17.89	15.93	15.97	16.58	17.78		15.97	16.45	14.71	16.92	16.39	18.52	16.66	15.98	15.51	14.07	14.89	14.86	15.47	17.67	15.17	14.85	14.43	14.83	15.49		15.23	16.1	17.35	16.87	15.85	16.26	16.21	15.62
1/P14373							18.48
1/P14384																		15.82											15.15
1/P14406	16.59	17.16	16.74	17.8	16.62	16.19	16.39	17.37	16.2	16.58	16.24	17.19	15.99	16.86	16.18	16.98	16.4		16.88	16.46	15.35	16.76	17.03	17.49	16.81	16.52	17.41	16.93	17.32	16.94			15.98	15.64	16.61	16.42	17.02			15.99	15.6	15.84	16.71	16.78	16.05	17.02	17.28	17.22	17.11
1/P14410
1/P14543			16.76	15.51	16.2	17.02		16.09	15.71	15.24	16.92		15.74	15.66	17.02	15.84	15.92	18.91		16.52	17.15			17.47			16.06		14.89	15.34	17.54	18.88	16.04	17.15		16.79	15.05	16.31	16.16	16.55	17.49	17.56			18.14	15.92		15.71
1/P14550	18.4	18.66	17.4	20.45	18.53	16.37	16.66	17.68	18.71	18.7	16.69	18.69	19.07	19.12	18.22	19.67	19.22	18.24	18.99	18.06	16.25	18.74	18.87	17.79	19.09	19	18.77	19.17	18.8	18.6	17.38	17.2	17.46	17.9	19.28	18.05	18.3	17.59	17.58	17.89	17.23	17.94	18.79	19.36	18.68	17.86	18.92	18.39	18.44
1/P14618	16.37	17.44	17.38	17.55	17.83	20.06	20.34	17.82	20.13	17.06	20.5	16.14	16.12	16.71	20.1	15.92	17.77	19.79	16.23	18.96	19.13	16.94	16.51	17.18	16.56	16.01	17.46	16.26	17.3	17.07	19.55	20.7	20.74	17.8	16.21	17.86	17.3	19.3	20.58	18.79	19.64	17.6	15.82	16.79	20.87	17.71	16.04	17.43	16.08
1/P14621	15.64		16.28	16.14	16.09					15.88			15.69			15.35	15.41					15.9						15.5	15.6						15.85								16.13
1/P14625	17.85	18.57	17.78	17.5	18.48	17.12	17.64	17.56	17.14	17.99	17.42	17.47	18.22	17.38	18.25	17.59	17.78	17.29	17.85	18.59	16.71	18.2	17.84	17.45	17.58	17.47	17.83	17.24	19.01	18.75	17.61	17.48	17.87	17.77	17.6	17.3	18.26	16.98	17.87	17.95	17.03	17.87	17.85	17.85	17.98	17.82	17.51	18.26	17.71
1/P14635	15.68							16.49												16.54								16.08
1/P14649		18.81		18.75			19.31						18.2			18.64								20.37	20.59			18.18								19.6						19.14					18.58
1/P14735	14.9	14.82			15.03	15.11			14.63	14.64	15.42	14.02	14.75	14.9	15.59	15.22	14.79	14.76		15.36	13.93	14.58	14.87	14.71	14.31			14.46	15.47	14.58	14.25		15	15.01	14.82	15.24		14.76	15.17			14.97	14.81	14.69	15.31	15.43	14.72	15.06	14.71
1/P14780		13.43				14.11	16.17		13.34	13.05	14.91				14.76					13.69	13.83	12.73							13.16	12.98	15.68							14.29	13.29		15.85				14.14			14.1
1/P14854	15.8	14.8	15.96	16.24	15.26			14.76	15.42	15.04			15.4	15.38	15.44	15.58	14.91		15.05	15.46		14.71	15.82	15.87		14.78	15.29	14.86	14.9	15.2				14.89	15.26	15.02				14.49			15.66	14.85	14.76	15.66	15.27	15.22	15.82
1/P14859							14.68	16.17										15.03		15.32																						15.57
1/P14866	15.8	16.3	17.6	17.25	17.77	16.24	16.82	17.07	17.74	16.31	16.77	15.86	15.86	15.93	17.5	16.39	16.21	17.64	15.92	17.84	15.95	16.15	16.27	17.44	16.16	15.9	17.05	16	16.72	16.26	16.66	17.03	16.92	16.51	15.88	17.64	16.33	16.4	16.88	16.29	16.31	16.48	16.05	16.26	16.76	18.25	16.13	16.36	16.06
1/P14868	16.17	16.56	16.7	16.96	16.69	16.66	18.15	17.05	16.77	16.35	17.31	16.28	16.8	16.69	17.43	16.55	16.78	16.94	16.58	17.11	16.09	16.32	16.45	17	16.4	16.36	17.28	16.35	17.04	16.22	16.35	17.2	16.85	16.35	16.77	17.41	16.74	15.94	16.73	16.53	16.43	16.78	16.7	16.43	16.88	17.26	16.23	16.75	16.44
1/P14902																								18.27
1/P14920				14.57										15.24									15.02			14.78		15.16							14.99								14.91
1/P14923	15.88	15.31	14.81	14.95	15.33	16.57	17.54	15.04	14.25	15.4	17.07	14.48	15.74	15.46	16.71	15.49	15.01	16.84	15.31	15.83		15.41	15.39	15.53	14.67	14.84	15.19	15.26	15.05	15.53	14.68	15.68		14.45	15.04	15.84	15.34	14.68		14.6	14.85	14.1	15.13	15.5	14.45	16.88	15.32	15.4	15.68
1/P14927	16.22	16.16	15.88	17.24	16	15.77	16.02	16.96	16	16.29	16.58	15.82	16.09	16.39	16.01	16.57	15.74	16.01	15.77	16.03	15.13	16.12	16.04	17.02	15.55	16.22	16.47	16.66	16.12	16.13	15.56	15.87	15.53	16.32	16.27	16.13	16.35	15.29	15.61	15.68	15.53	16.12	16.06	15.77	15.96	16.72	16.06	16.62	16.3
1/P15056		16.36																																															16.99
1/P15086							16.76				16.62
1/P15088								15.3					15.25				16				17.64										16.57										16.84					15.84
1/P15090																				16.87	16.49								18.32		15.99		15.88												16.55	17.76
1/P15104		17.79	15.64	15.4	15.45			15.86				16.61	15.32	16.1		15.48	15.31		15.43	15.61		15.54	15.97	14.75	15.67	16.31	15.81	16.07	14.93	15.27		15.77			15.37	15.75	15.6				15.49		16	16.15	14.82	15.4			15.81
1/P15121		16.37			16.17	16.12	16.89	16.11	17.79	16.63			15.54	15.74	17.17	15.85	16.35	17.22	15.73	17.12	16.33	16.53	15.87		15.89	15.84	15.94	15.65	16.35	16.7	16.93	16.61	17.76	16.66	15.85		16.52	17.44	17.8	16.77	16.8	16.76		15.78	18.64	19.09	15.85
1/P15144	16.59	16.26	15.21	15.63	15.54	17.09	18.33	15.96	14.59	16.07	15.14	15.53	16.16	16.46	18.2	16.01	15.45	15.48	16.25	17.63	14.44	16.33	16.28	18.15	15.17	15.62	17.02	15.99	15.78	16.08	15.05	15.48	15.07	15.89	15.94	18.71	15.93	15.21	15.23	16.31	15.32	15.96	16.39	15.83	15.61	16.75	16.86	16.11	16.33
1/P15151
1/P15153	14.95	14.93					16.93	14.87		14.19	15.03		14.9		15.45	14.95	14.93	14.95		14.76	15.86				14.43	14.14	15.33		14.27		15.47	14.74	15.67	15.53			13.89	15.01	15.67	15.03	15.72	15.36						15.34
1/P15169
1/P15170					15.96	14.97		15.04												15.33			14.64				15.14									15.45								15.1	15.69
1/P15289				14.3								15.41	14.9													15.14			15.89					14.9		15.22				15.18		14.85	15.19			15.87		14.97
1/P15291						14.9	14.75				14.88				16.23					14.79				14.14			14.77					13.97														14.29
1/P15311		18.14			18.37	18.12	17.49	17.92				17.07	16.77	17.32	19.15	17.49	17.38	17.38	17.03	18.51	17.54	17.4	17.09		17.61		18.12	16.05	18.36	17.5	18.06	17.22	19.07	17.29	16.73	18.16	17.95			18.14		17.68	16.9	17.39	18.76	17.61	16.97		17.45
1/P15313				15.85	16.04																																			15.54
1/P15374	14.2	14.79			15.15		15.18			14.6	15.76	14.63	14.41	14.95	15.02	15.3	15.03		15.05	15.11		14.71	14.91		15.05	14.73	14.75	14.96	14.89	14.7					14.83		14.58						14.9	15.23	16.15		14.89	14.69	14.51
1/P15428	15.19	15.9	15.05	19.52	15.26	14.89		14.02	14.84	14.76		14.76	17.64	15.45		15.9			16.05			14.74	15.21	15.77		15.1		15.31		14.69			14.04		15.86		15.55		14.32				15.75	16.12		18.22	14.85	16.29	16.83
1/P15498																																	15.09						15.16
1/P15529															15.87																					15.76
1/P15531	15.92	16.53	17.01	17.25	17.45	16.5	16.67	17.13	16.82	16.27	17.21	16.29	16.35	16.22	18.35	15.77	16.47	17.75	16.24	17.94	16.02	16.34	16.38	16.26	15.91	16.44	17.58	16.46	17.35	16.25	16.49	17.54	16.92	16.87	16.53	16.75	16.01	16.63	17	16.63	16.53	16.74	16.9	16.36	17.25	16.06	16.18	16.44	15.91
1/P15559					16.97	15.64					16.23				16.12												16				15.82					16.16								16.03
1/P15586	17.49				17.63			15.17		17.05		16.61	17.56		17.62	16.86			16.87					16.98		16.3	17.78	17.26		17.75			16.96	17.62	16.87	15.19	17.04			17.57		17.8		17.24	15.68	17.27	17.03
1/P15735	15.43									15.87		15.68		15.97		16.05						15.36						15.74															15.33	15.85		15.79			16.01
1/P15822						13.9	13.46				14.26								14.41	14.06											13.66							13.85		14.64
1/P15848																														14.38																		14.56
1/P15880	17.58	17.59	17.65	17.96	18.02	17.33	17.55	18.4	18.04	17.35	17.53	16.38	17.5	17.59	17.95	17.53	17.41	18.33	17.44	18.4	17.34	17.26	17.22	18.39	16.72	17.2	18.18	17.2	17.99	17.46	17.58	17.71	17.65	17.61	17.08	18.33	17.65	16.52	17.99	17.69	17.72	17.8	17.47	17.3	17.71	18.32	17.57	17.83	17.57
1/P15907		14.75		14.7				14.56				14.01	14.72	14.31	14.74	14.44				15.33		14.37	13.63	15.82			15.48		15.37	14.13			14.04	14.4		15.27	14.46		14.2	14.51				14.37		14.43			14.18
1/P15923
1/P15924	19.28	20.21	19.71		19.79	18.19	17.53	19.32	19.81	20.39	19	20.55	20.03	20.51	20.45	19.34	19.93	19.6	20.29	21.11	14.93	20.05	20.06	19.57	19.82	20.53		20.21	19.78	19.89	18.52	18.87	18.65	18.95	20.7	21.31	20.1	18.32	18.69	19.1	18.12	18.95	20.66	20.53	19.51	20.71	20.5	19.87	19.9
1/P15927			15.28	15.39	15.84			14.57				14.95					14.7			15.61				15.13									15.11			15.04										15
1/P15941							17.85								16.12			15.13			15.06
1/P15954		15.82		15.99						15.9		16.73															15.96	15.72	15.99
1/P16035	16.85									16.53												16.87	16.64			16.54																	16.84				16.5		16.7
1/P16070									17.51		17.21						15.38	16.02		15.37												15.11	17.38						17.46	15.62		15.58			16.96	16.1		15.76
1/P16083	15.23	15.07	15.3	16.12	16.08				15.06	15.15		15.81	16.2	15.54								15.43	15.24					15.27		15.3					14.97								15.81	16.01			15.36	14.96	14.71
1/P16104				18.54
1/P16109
1/P16144						14.6					16.43		16.17							14.11	16.1						17.11						16.92			14.71						16.59				16.86
1/P16152	17.87	18.17	17.17	17.98	17.48	16.43	17.75	17.74	18.13	18.09	17	18.44	18.66	17.88	17.95	17.72	18.33	17.25	17.82	17.48	15.29	18.04	18.37	17.28	18.48	18.27	18.83	18.06	18.56	18.11	17.08	16.45	17.22	18.87	18.78	17.5	17.6	16.93	17.36	18.89	16.47	18.54	18.79	18.33	17.25	16.99	18.06	18.02	17.83
1/P16157							16.51					14.22				14.8	13.92		14.26		14.2			14.75	14.87						15.02							15.62			15.05			13.71
1/P16219	18.89	18.03		17.05		16.02	16.31	18.15	17.37	18.6	16.17	18.38	19.47	19.22	15.94	19.05	18.31	16.38	19.36	16.42		18.46	19.37	16.95	17.69	18.92	17.44	18.9	16.43	18.63	15.82	15.89	16.05	17.17	19.7	16.88	18.99	15.9	16.2	17.02	15.62	16.97	19.14	18.59	16.5	16.85	19.16	18.47	18.95
1/P16233	16.06						17.12										16.41				16.71				15.91								16.03			16
1/P16260																																										16.89
1/P16278	15.61	15.52	14.95	15.04	15.13	15.03		15.81		15.16	14.82	14.32	15.19	14.83	15.95	14.93	14.85	14.43	14.98	15.11	14.65	15.5	15.36	15.23		14.73	15.85	15.41	16.63	15.49	14.95	15.28	15.04	14.97	14.76	17.58	15.1	14.55	14.78	14.91	15.06	14.93	15.24	15.29	15.6	16.35	14.85	15.77	15.27
1/P16284															15.01						15.63			15.3							15.11		14.98	15.03		15.19		14.89	15.05	15.22	15.27	15.28			15.34	15.47
1/P16298
1/P16333															15.46	18.04
1/P16383																																															12.73
1/P16401	18.09	18.05	20.65	21.5	20.8	18.64	17.8	20	22.19	18.41	18.68	15.92	17.01	16.51	20.51	17.31	18.5	18.73	16.39	21.58	19.22	18.32	16.83	19.54	17.22	16.18	20.44	16.64	18.41	18.39	19.26	18.74	21.43	19.15	16.43	18.29	17.22	18.96	21.39	19.29	19.33	19.14	16.34	17.05	21.22	21.85	16.55	19.5	16.44
1/P16402												15.22
1/P16403				13.74				15.5	14.67									13.98		15.36														14.62		16.51					15.04		13.89
1/P16422											15.14									14.94
1/P16435	17.39	17.25	17.79	16.98	17.77	15.94	15.6	17.11	15.8	17.38	15.98	16.83	15.97	16.79	16.25	17.13	16.57	15.79	16.7	16.63	15.22	17.35	17.43	16.9	16.95	16.82	16.96	16.61	16.92	17.39	16.51		15.49	16.22	16.62	15.99	17.23	15.85	16.08	16.81	15.93	16.27	16.8	16.93	15.98	17.9	17.32	17.44	17.55
1/P16444	17.61	17.95	18.44	18.98	18.47	16.9	15.92	18.66	18.6	17.81	17.39	16.81	17.62	17.64	18.67	17.63	17.65	18.84		19	17.13	17.5	17.45	18.88	16.75	17.62	18.09	17.93	18.61	17.97	17.92	17.76	18.3	17.57	17.81	18.87	18.13	17.48	18.29	17.85	17.75	17.7	17.7	17.56	18.24	19.06	17.47	18.37	17.84
1/P16452							14.66
1/P16455				14.83																15.23						14.85	15.66
1/P16615	16.35	16.37	17.48	16.95	17.48	16.24	16.7	16.91	16	16.3	16.45	16.22	16.36	15.81	16.73	16.22	16.42	16.91	16.07	16.98	16.12	16.28	16.05	16.32		16.15	16.58	15.88	16.92	16.53	16.12	16.59	16.26	16.83	15.96	16.61	16.2	15.61	16.23	16.57	16.37	16.68	16.24	16.22	16.75	16.73	16.13	16.51	16.27
1/P16662	18.6	18.71	17	16.48	17.29			17.26	16.51	18.85		18.88	18.14	19.64	16.09	19.58	18.4		19.18	14.68	15.35	18.66	19.69	15.87	18.36	18.92	16.3	18.8	17.92	18.74	15.48		16.06	18.69	18.16	15.28	17.34	16.18		19.6	15.7	18.85	18.95	19.22	14.28	15.64	20.13	18.72	19.63
1/P16671																				15.77
1/P16870								15.71													16.18												15.49	15.06
1/P16885				13.95	16.72			15.61	16.77	13.16					13.78	16.26					13.2					15.97	14.51		16.95	16.2			14.93	16.48	15.98	14.29			14.76	14.09		16.59				14.22		13.69
1/P16930	19.14	19.37	16.78	18.9	17.98	15.79	15.83	17.65	18.68	19.3	15.6	19.53	19.18	18.98	16.54	18.17	20.13	16.32	18.83	18.25	15.3	19.29	19.83	17.77	18.05	19.79	19.06	19.47	19.21	19.2	16.88	15.75	17.57	18.44	19.52	17.18	18.68	16.32	17.67	18.24	16.61	18.06	19.65	19.91	18.72	17.4	19.39	19.37	19.42
1/P16949			17.32	17.93	17.84				16.18									15.98		14.86											14.67	16.23	15.57			16.78			15.57	14.66		14.71			16.25	15.31
1/P16989
1/P17028								15.72																																				16.01
1/P17050																													16.21							16.41
1/P17096					17.11	15.69		17.1										17.66		17.7				17.92	14.57		18.58					16.71				18.81				16.71	15.21				16.93
1/P17152
1/P17174	17.18	17.51	16.02	17.03	16.21	16		16.84	16.65	17.46	16.13	17.35	17.69	16.73	17.25	16.09	16.33	15.89	16.6	16.98		17.72	17.02	16.45	16.11	17.33	17.7	16.6	17.51	17.5	15.9	15.86	16.24	17.25	17.14	16.33	17.41	15.74	16.42	16.94	16.07	16.64	17.7	17.42	16.59	16.03	16.53	17.57	16.89
1/P17213				15.68			16.32		17.04		16.29									16.25						15.75				16.09		16.56	17.07	15.64					17.16	16.13	16.88	15.9		15.92				16.09
1/P17252																14.33				15.03
1/P17275								17.34														17.1							17.37															17.04
1/P17301		16.83				15.27	15.44				15.35				15.2			16.22						14.64							14.7	15.07				15.34									15.04				16.74
1/P17405															16.47																					15.83
1/P17480			15.53	15.32	15.45			15.66	15.41						15.24			15.73		15.47				15.51			15.39												15.58						14.84	15.63
1/P17612	14.92	15.69	15.13	15.31	15.44	14.99		15.61	14.99	15.65	15.24	15.21		15.12	15.89	15.13		13.96	15	15.64	14.46	15.45	15.45	14.38	15.05	15.07	15.75		15.49	15.46	15.16		15.33	14.69		15.16	15.29	15.26	15.49	15.72	15.32	14.61	14.96	15.58	16.06	15.57	15.08	14.94	15.59
1/P17655			13.14	13.13	13.83	14.15	14.24	13.37	14.01	13.6	13.96	12.61	13.02		14.96		14.42	14.2		14.51	13.82		13.41	14.33	13.48		13.52	13.01	13.9	13.09	14.37	14.28	14.08	13.79		13.67	13.63	14.23	14.11	13.29	14.05	13.12	13.43	13.34	14.1	13.81		13.15
1/P17661				15.76				17.42	19.04		16.4						18.02	17.95			18.24			17.59						16.71	18.93	18.38	18.36					17.11	18.09		18.79	17.59			17.72	17.78		17.68
1/P17706			15.68
1/P17812			15.19	14.96	15.68	14.08	14.7				14.12									13.97												14.73													14.79	14.9
1/P17813							16.67											16.32													15.87	15.79						15.4			16.13
1/P17844	15.31	15.57	16.36	16.96	17.02	15.69	15.78	15.9	16.68	15.07	15.33	14.47	14.87	15.36	15.72	15.15	15.65	15.75	15.17	16.42	15.17	15.32	14.89	15.97	14.95	14.56	15.91	15.08	15.82	15.29	15.63	15.75	16.29	15.01	15.43	15.97	15.27		16.36	15.54	15.77	15.37	14.82	15.01	16.21	16.35	14.89	15.68	15.24
1/P17858	15.09	16.31		15.71	15.54	15.81	15.72	15.7	16.05	15.67	16.25	15.83		16.11		14.71	15.7		15.95	16.32	15.34		15.98	15.8	15.49	15.56	16.17	16.09		15.67	15.76	15.29	16.13	15.32	15.99	16.58	15.8	15.34	16.03	16.16	15.42	15.68	15.55	16.18	16.56	16.64	15.93	16.01	15.95
1/P17900																																														14.92
1/P17927
1/P17931					17.01	17.04	18.13	15.79		14.82	18.14	16.91	17.17	17.22	17.68	17.53	15.34	15.93	16.82	15.38	16.18	14.87	17.82	16.37	14.85		15.59		15.83	14.7	15.74	15.8	16.42	16.12	16.86	15.3	15.89	15.92	16.32	16.47	15.8	16.11	17.26	17.68	17.63	17.57
1/P17936															16.94			16.74														16.77
1/P17947
1/P17948																16.46
1/P17980	16.36	16.34	16.63	16.79	16.95	16.1	16.71	16.63	16.84	16.29	16.61	15.9	15.87	16.34	16.52	15.9	16.25	16.7	15.86	17.08	16.04	16.11	16.04	16.33	15.83	16.09	16.54	16.14	16.24	16.08	16.34	15.93	16.69	16.45	15.92	16.68	16.2	16.28	16.55	16.22	16.1	16.33	15.85	16.31	16.57	17.51	15.85	16.45	16.26
1/P17987	17.05	16.98	18.19	17.93	18.05	17.52	18.31	17.36	17.73	16.96	18.16	16.62	17.07	17.35	17.64	17.29	17.2	17.25	16.88	17.96	17.14	16.98	16.83	18	17.01	16.53	17.42	16.96	16.4	16.95	17.09	17.69	17.46	17.29	17.25	18.24	16.79	16.99	17.33	17.16	17.18	17.49	17.06	17.13	17.81	17.52	16.84	17.62	16.97
1/P18031	17.27	16.94		17.08				16.66		16.93		18.09	17.33	17.82		18.89	17.25		17.34			16.99	17.94		17.09	17.83	17.03	17.93	16.19	17.07			15.66		17.23		17.1		15.69	16.86		17.15	17.77	17.88	15.82		17.82	17.18	17.97
1/P18054																		16.92															16.22
1/P18074													15.91
1/P18077	18.91	17.98	17.97	19.16	18.75	17.67	18.45		19.52	18.17	18.24	16.72	18.31	17.48	17.85	18.37	18.46	19.83	17.84	18.13	17.76	18.19	17.6	19.88	17.48	17.9	18.39	18.37	18.75	18.01		18.71	18.34	18.61	18.05	19.1	18	16.85		17.47	18.74	18.53	18.55	17.37	17.49	19.28	17.26	19.27	18.73
1/P18084																		14.15													14.07
1/P18085	17.32	17.9	18.43	18.26	18.29	17.86	18	19.07	16.96	17.6	18.24	17		17.72	19.42		17.19	18.67	17.95	19.69	18.41	17.82	17.48	18.58	17.69	17.08	18.12	16.56	18.2	17.84	18.03	17.87	19.06	17.42	17.1	19.43	18.11	18.33	18.85	18.71		17.3		17.25	18.82	19.22	17.4	17.52	17.35
1/P18124	17.52	17.75	18.21	18.49	18.07	17.59	17.45	18.5	18.15	17.76	17.8	16.73	16.94	17.4	18.33	17.22	17.87	18.01	17.6	18.62	17.74	17.76	17.41	18.96	17.33	17.18	18.28	17.53	18.36	17.83	18.08	17.2	18.01	17.46	16.98	18.5	17.92	16.74	18.12	17.94	17.92	17.28	17.39	17.32	18.23	18.85	17.5	18.3	18.03
1/P18206	16.13	15.65	15.73	15.62	15.5	16.74	15.82	16.27	15.98	15.96	16.35	15.51	15.92	16.3	16.58	16.04	16.72	17.05	15.78	16.44	16.36	16.12	15.71	15.86	15.71	15.59	15.7	15.15	15.6	15.74	18.05	17.31	16.79	15.97	15.54	15.93	16.19	18.18	16.58	16.17	18.16	15.82	15.83	15.74	16.99	16.27	15.65	15.6	15.84
1/P18283		16.1				16.44					16.99				16.01			15.46											15.88					15.63		17.05				15.9		15.7						16.51
1/P18428		14.67		14.37		15.28	15.47	14.62		13.97	15.61		14.14		17.63					14.53	14.93				14.64		14.83				15.5	14.64	16.7	15.17		14.35	14.18	14.98	16.94	15.56	15.75	15.02		14.23	15.19	14.13		14.71	13.91
1/P18433																				14.49
1/P18440			17.14				16.32			16.64			16.89	16.34											16.28	16.29			17.06					15.98	15.63												16.59		15.77
1/P18583					15.12		16.12	15.68							15.65					15.57				15.89			15.8			14.64			14.88	14.97		16.54				14.54	15.04	15.44				16.15			14.9
1/P18615				14.78									16.16																															15.66
1/P18621	16.75	16.67	16.3	17.22	17.11	16.11	16.21	17.1	16.91	16.39	16.31	15.45	16.37	16.37	17.04	16.36	17.21	17.32	16.43	17.11	16.32	16.45	16.16	17.41	15.69	16.19	16.73	16.27	17.04	16.59	16.58	16.53	16.84	16.33	16.15	17.12	16.66	16.11	16.88	16.52	16.61	16.53	16.42	16.12	16.8	17.56	16.1	16.8	16.68
1/P18669	15.87	16.25	15.62	16.45	15.91	15.55	16.11	15.58	16.92	16.39	16.32	16.66	16.83	16.02	16.45	15.31	16.78	16.43	16.11	16.65	15.05	16.12	16.12	15.34	15.89	16.49	16.98	16.28	16.84	16.31	15.81	16.1	16.1	16.38	16.89	15.98	15.86	16.24	16.05	15.81	16.05	16.02	16.86	16.89	16.22	15.77	15.83	16.26	15.91
1/P18754	15.53	15.32	15.43	15.98	15.22	15.04	14.76	15.81	15.2	15.31	14.79	15.12	15.28	15.34	16.33	14.72	15.01	15.19	15.34	15.86	14.85	15.3	15.25	15.93	15	14.7	15.41	15.25		15.56	15.36	15.6	15.48	14.95	14.82	15.97	15.07	15	15.24	15.62	15.16	14.49	15.1	15.36	16.54	17.76	15.25	14.8	15.16
1/P18827		15.71	16.93	15.48	16.48			15.31		14.92		15.9		15.74	15.25		15.57		15.5	15.94		15.32	15.4	15.91	15.54	15.15	16.47	15.33	15.88							15.72	15.2		14.97			14.89	16.15	15.79
1/P18858															16.61																		16.34
1/P18859		16.57	16.3	16.17	16.07	14.93		16.78	15.33	16.23	14.9	15.55	15.58	16.82	16.04	16.39	15.98	14.84	16.11	16.23	14.71	16.14	16.6	15.83	15.44	16.01	16.13	16.73	15.98	16.38	14.94	15.09	14.93	15.17	16.22	16	16.12	15.86	14.96	15.62	14.59	15.12	16.67	16.65	15.47	16.07	16.69		16.23
1/P18887				14.91			14.42											14.54																											14.56
1/P19013		17.55			16.07		17.07																								16.12					15.8	17.32	16.8											16.22
1/P19022			16.3		16.06										15.56			15.76																		16.32
1/P19075					14.75																													15.15		16.69					14.81
1/P19086					15.14		16.02		17.2		15.27		15.48	15.64		15.6				15.76	16.32			15.6			15.13	15.19	15.14	15.04	15.95		16.34	15.61		16.09			16.08		15.89	15.67			15.96	15.6		15.74
1/P19174		16.03																																					15.4
1/P19224	15.21	15.38	14.75	15.11	15.23			15.75		15.57		16.36	14.92	16.28		15.59	14.8		15.65	14.11		15.54	16.14	15.42	15.56	15.83	16.88	14.91	14.72	15.98		14.65		15.48	15.6	17.31	14.92			16.96		15.32	15.38	15.49	14.99	16.4	16.13	14.91	15.83
1/P19256	15.19	15.4	15.83	15.56	15.49							15.5	15.3	15.52		15.65	14.91					15.17	15.48			15.62	14.98	15.65		15.32				15.21			15.72					15.35	15.83	15.28			15.44	15.38	15.29
1/P19320			18.11											16.27										19.26		16.6														17.57
1/P19338	17.79	17.46	18.49	18.48	18.59	18.27	18.19	18.4	19.49	17.61	18.65	16.96	17.42	17.25	19.99	17.78	17.52	16.57	17.5	19.2	17.3	17.89	17.36	18.25	16.93	17.45	19.18	17.28	18.33	17.62	17.41	18.75	18.95	18.19	17.21	19.85	17.81	17.85	18.89	17.78	17.71	18.09	17.36	17.48	17.62	18.44	17	17.94	16.93
1/P19367		15.54				16.1		15.82		15.65	16.55			16.15	15.97		15.85	16.08		16.83	16.29	15.53			15.74	15.16			15.43	15.59	16.27	15.86	16.32			15.72	15.66	15.66	16.23	15.86	16.15				16.37	15.56		15.09
1/P19387	17.67	16.54			16.53	18.56	18.21	16.68	15.67	16.31	16.35	17.17		17.61	16.64		17.41		17.59			16.89		16.47	16.96	17.09				16.77			16.8		17.28				17.01					17.56	16.37			16.26	17.34
1/P19388				15					15.17									15		14.81																14.62										15.09
1/P19404	16.69	17.5	16.69	16.5	16.48		15.87	17.69	16.64	17.03		16.81	16.46	17.37	17.21	16.69	16.97	16.4	17.04	16.41	16.02	17.11	17.51	17.43	16.26	17.22	16.97	16.71	17.33	17.18	16.54	16.1	16.43	16.26	16.53	17.11	17.31	15.47	16.41	16.78	16.47	16.23	17.67	17.01	16.73	16.95	17.91	17.6	17.6
1/P19419				16.94			17.15					16.51								18.11																						16.85	16.42
1/P19440														15.65																16.07
1/P19447																																	15.17
1/P19474					17.12						16.45				16.55					16.61							16.37		15.36				16.78												15.87	16.56
1/P19484																16.21																											16.11
1/P19525		13.99							14.83		14.78				14.24		13.84	14.38		14.53					13.77		14.66					14.63				14.22								14.44
1/P19532																						14.56								14.59
1/P19623		15.44		16			15.92	15.85	16.02		15.76		15.16		16.72	15.84	15.68	16.47		16.73	15.84			15.62			16.52		15.68	15.31	16.24	16.29	16.88	16.28	15.37	16	15.7	15.8	17.07	16.32	16.41	16.29	16.71	15.56	16.31	16.24		15.57
1/P19652	15.67	16.51	16.78	15.65	16.67	15.04	16.43	15.03	15.36	15.63	14.99	15.7	16.51	15.66	17.52	15.99	15.5	15.54	15.91	15.27	15.28	15.52	15.97	14.93	15.4	15.96	15.67	15.38	16.28	15.66	15.25	15.97	15.23	15.74	15.58	15.36	16.45	15.83	15.43	15.02	15.28	15.41	16.52	15.82		15.03	15.87	16.43	15.86
1/P19784		15.86								16.27		16.73				17.25			17.34												18.28							16.77									16.88	15.68
1/P19793			16.04																					15.51																					14.97	15.28
1/P19801					16.22	15.48	16.33				16.53				15.68					16.61					15.53											16.14									16.23
1/P19823	14.45	14.91	16.87	14.69	16.28	15.98	15.85	14.94		14.7	15.71	14.84	14.99	14.68	18.51	14.97	14.72	15.24	14.9	17.35	14.88	14.76	14.56	15.44	15.21	14.31	16.11	14.4	15	14.83	14.58	17.79	14.8	14.76	14.54	15.77	14.08	14.24	14.9	14.76	14.94	14.62	14.74	14.67	16.57	14.35	14.29	14.55	14.94
1/P19827	14.66	14.9	15.39	14.44	14.93	17.62	15.56	14.99		15.01	17.07		15.39		16.14	14.88	14.92	16.68	14.6	15.02	15.47	14.61		15.53	14.65	14.34	15.26	14.47	14.85	14.65	15.21	18.29	15.01	14.93	15.15	14.53	14.76	15.31	15.12	14.59	15.46	15.01	14.95	14.63	16.82			14.69	14.82
1/P19838		15.1					15.38	15.39	16.72						15.4		15.16	15.16		15.88	15.59	15.07							15.14		15.84	16.19	15.65	15.29				15.47	15.89	15.46	15.62	15.39			15.54	15.51		15.26
1/P19878																																		17.63
1/P19971	15.94	16.62	15	16.36	15.56	15.11	15.73	15.81	16.15	16.41	15.54	15.74	15.66	15.51	16.97	14.76	15.96	17.38	15.44	15.9	15.48	16.38	15.58	14.72	14.9	15.11	17.71	15.88	17.62	16.31	15.97	15.7	17.23	16.97	15.61	15.82	15.45	16.46	17.01	16.72	15.87	16.73	15.27	15.79	16.1	15.21	15.38	16.5	14.93
1/P20020		16.89			17.79	16.55	15.2	16.42	17.4		17.02		15.57		17.78		16.19	16.93		15.47	16.53	16.61		16.25	15.33				15.81				17.54	16.03		16.7		16.56	17.59	16.17	16.74	16.37				17.1
1/P20036	14.66	15.75	16.03		16.21	15.56		15.4	17.59	15.98	14.84		14.89		17.49	14.8	15.41	15.79	15.51	16.25	15.33	15.83	15.27		15.04				15.75	15.29	16.42	15.55	16.48	14.79		15.71	14.77	15.23	16.4	15.86	15.19	15.6	15.4	14.81	18.22	15.8		15.68	14.69
1/P20042		15.46	15.79	15.46	15.85	15.65		15.54			15.36			15.57	15.73					16.07	15.35			16.24	15.15	14.57	15.97		15.7	14.94			15.71			15.89			15.52	16.06	15.74			15.27	15.91	16.18	15.06	15.14	14.96
1/P20061
1/P20073	15.72	15.51	15.63		15.75	15.23	15.29	15.81	16.18	15.24	15.22	15.57	15.6	15.5	16.26	15.65	15.47	15.81	15.77	16.47	15.57	15.72	15.55	16.01	15.53	15.38	15.94	15.31	15.8	15.79	15.81	14.76	15.66	15.26	15.45	16.38	15.87	15.77	15.92	15.66	15.57	15.68	15.6	15.57	15.74	16.18	15.64	15.68	15.84
1/P20132				15.64																									14.93																		15.39
1/P20138			16.59
1/P20160		16.13					18.67			15.82	17.01				17.48		15.9			17.14									16.37		17.35							16.89			17.3				17.65			16.2
1/P20248																15.88	14.91																					15.14	14.78
1/P20290			13.71	15.26					15.24																		14.81					14.38				14.24
1/P20337							15.18
1/P20338																				15.63
1/P20339							15.06		14.76		15.35				14.7			14.85
1/P20340	15.08	15.6	16.54	16.6	16.52	15.95	15.39	15.99	15.27	15.54	16.37	14.91	14.58	15.3	16.32	14.96	15.36	17.52	15.24	16.98	15.46	15.45	15.16	16.05	15.04	15.17	15.76	14.76	15.3	15.34	15.64	15.78	15.74	15.41	15.24	16.45	15.74	16.04	15.88	15.99	15.37	15.16	14.76	15.25	15.91	16.26	14.77	15.82	15.28
1/P20585															16.88
1/P20591	18.12	17.83						16.92				17.66	18.32	18.17		17.78			18.15	17.82		18.15		17.47	17.53	18.59	18.57	18.52	18.04	18.02				17.66	18.43	17.43	18.01					17.69		18.01		17	17.73	17.98	17.96
1/P20592			18.39
1/P20618	16.5	16.76	16.99	17.58	17.29	16.42	15.46	16.79	17.34	16.79	16.79	16.42	16.9	16.54	16.99	16.01	16.82	16.69	16.5	17.09	16.19	16.63	16.73	16.9	15.65	16.62	17.18	16.65	16.57	16.56	16.56	17.21	16.87	17.04	17.05	16.86	16.69	16.5	16.79	16.73	16.59	17	17.07	17.03	16.89	16.66	16.55	17.03	16.57
1/P20645																																														15.39
1/P20674	18.24	17.92	18	18.96	17.78	17.54	18.23	18.14	17.63	17.73	17.81	17.14	18.03	18.27	17.46	18.4	17.6	16.51	17.95	17.52	16.64	17.89	18.01	18.63	17.1	17.53	18.35	17.69	18.26	17.78	17.04	17.35	17.15	17.31	17.77	17.78	17.99	17.55	17.19	17.39	17.03	17.27	18.47	17.51	17.24	18.04	17.9	18.06	17.88
1/P20700	15.46	15.86	16.96	16.53	16.9	16.07	16.14	16.89	17.64	16.02	16.05	15.4		15.82	16.92	15.56	15.99	16.26	15.5	17.29	16.49	15.9	15.4	16.25	15.66	15.11	16.76	15.88	15.83	16.04	16.32	16.01	16.96	15.68	15.29	17.7	15.97	17.02	17.12	16.42	16.27	15.88		15.39	17.19	17.25	15.3	16.1	15.41
1/P20701		16.37						14.28	15.65	16.02	14.93		16.41			16.27	16.57		16.53		15.43	16.12	17.27		15.64			16.88		16.1			15.12		16.07		15.71			14.49		14.82	16.7	16.93	15.26		16.65	16.7	16.7
1/P20702									16.74										18.68														15.98	15.99
1/P20711																																													15.48
1/P20742
1/P20749						16.76					16.86
1/P20774	16.18	15.33				19.76		17.58	16.88	15.89	17.92	16.09	16.24	16.39	18.29	16.69	18.03	20.73	15.67	16.8	20.66	16.02	15.64		16.93	15.77		15.74	15.54	16.69	19.24	16.95	18.25	19.45	15.59		15.46	17.84	18.23	20.1	19.16	19.13	16.24	15.9	18.78			16.41	15.55
1/P20810				14.97							14.31		15.3				15.26	15.14									15.2									15.06												15.15
1/P20823
1/P20839							19.68									18.75				19.06	17.14	19.05	19.27										18.39													18.88
1/P20851			15.27				16.1				15.8				15.25									16.35																						15.27
1/P20908						17.26		16.51			16.72				18.19		15.58	16.66		16.62											17.21	17.4	17.14						16.97	16.81	17.26	15.86
1/P20930
1/P20933				15.49	15.98		15.65						15.3		15.39			15.46								14.61			16.2				15.29								14.86		15.16			15.01
1/P20936											16.8																			16.34						16.86
1/P20962					17.01								17.55	16.35		15.87		17.12	16.8	16.96			16.67	16.33			16.83		17.26					16.15	16.89		16.21					16.23	17.34	17.03
1/P21266		15.12	17.03		17.4	15	16.85		14.64		15.75	15.17				15.91		15.83	15.31	16.32		14.7							14.72			15.31	14.98				14.73	14.64	14.77					14.68	15.27			15.02	15.69
1/P21281	15.48	15.61	15.74	15.77	15.99	15.98	15.92	15.41	15.96	15.68	16.28	15.24	15.05	15.49	15.98	15.27	15.56	15.2	15.21	15.94	15.56	15.68	15.37	15.27	15.06	15.29	15.81	15.3	15.58	15.52	15.64	15.66	16.05	15.49	15.38	15.86	15.57	15.81	16.28	15.37	15.61	15.53	15.35	15.24	16.17	16.63	15.21	15.83	15.47
1/P21283								15.37												16.6							16.41				15.59			15.79								15.95			15.11
1/P21291					16.77	16.83	14.91	16.07						16.01	17.2			18.39		16.67	17.44			16.89			17.1					18.03	17.13	16.49		16.03	16.37			16.73	16.92	16.6			17
1/P21333	16.53	16.19	17.29	16.51	16.87	19.24	16.99	17.79	17.73	16.35	17.99	15.74	16.76	16.5	18.72	16.96	18.5	20.46	16.03	18.22	19.66	16.46	15.99	16.75	17.18	15.52	16.53	16.06	16.48	16.68	20.19	20.1	19.15	18.61	16.2	17.93	17.09	19.7	19.26	18.59	19.99	18.49	16.16	15.97	19.12	16.03	15.61	17.04	15.74
1/P21359							15.39		17.21	16.45								16.38	17.32																		16.53			16.84		15.82	16.78
1/P21397	18.63	18.13	16.95	18.95	17.3	17.15	15.64	18.38	16.43	18.25	17.8	17.56	17.99	18.76	17.61	18.61	17.66	16.55	18.08	17.3	15.52	18.19	18.32	18.62	17.6	18.13	17.53	18.74	17.73	18.34	15.97	15.67	16.24	17.97	18.16	17.48	19.39	15.98	16.26	17.91	16.01	17.65	18.15	18.06	16.18	20.44	18.38	18.46	19.12
1/P21399	17.43	18	17.14	18.77	18.05	16.03		16.99	16.99	18.18	15.82	17.72	17.22	17.57	16.84	17.43	17.66	15.96	17.88	17.76	15.32	18.23	18.32	16.98	17.27	17.97	17.54	17.9	17.05	17.56	16.5	15.83	16.49	15.92	17.89	16.17	17.7	16.23	16.16	16.06	16.39	15.36	17.7	18.13	17.18	17.63	17.79	17.67	17.62
1/P21589						16.32		15.6			17.34						14.88		15.03	15.51				15.84			15.8		15.71	15.79						17.47						14.72						15.54
1/P21695	16.14	16.57	14.77	16.47	14.99		15.23	15.38	16.5	16.33		17.05	16.86	16.7		16.78	16.55	15.4	16.48	15.47		16.18	17.17	15.69	16.94	16.57	15.36	17.34	15.76	16.04	15.2		16.23	16.78	17.26		15.66	15.51	15.48	16.19	15.27	16.23	16.58	17.39	16.18	16.48	16.79	16.63	16.65
1/P21796	16.23	16.75	17.63	16.93	16.89	18.45	17.26	18	15.88	16.62	19.04	16.45	15.69	17.1	17.82	16.61	16.55	17.11	16.47	17.75	15.63	16.53	16.52	17.07	16.74	16.45	17.86	15.42	16.86	16.79	16.4	17.01	16.61	16.47	16.37	16.96	17.3	16.4	16.66	17.36	16.07	16.5	16.63	16.35	16.83	16.98	16.44	16.39	16.7
1/P21810	16.66	16.35	14.46			21.38	17.39	18.26	17.52	16.72	19.85	17.12	16.9	17.14	20.12	17.57	18.47	21.48	16.48	18.3	20.89	16.53	16.4	16.18	18.17	16.71	15.66	16.94	15.97	17.4	18.69	20.46	21.15	21.03	15.57	16.8	16.85	18.94	15.36	15.09	20.28	20.68	16.51	16.84	22.2		16	17.07	15.73
1/P21912	18.17	17.7	16.72	17.36	16.6	16.56	16.08	17.53	16.25	17.88	16.87	17.53	16.83	18.15	16.43	18.05	17.26	15.83	17.51	16.48		17.95	17.25	17.01	17.48	17.33	17.76	17.64	16.71	18.09	16.39	16.06	15.8	16.42	17.49	16.22	17.83	16.04	15.74	17.21	16.26	16.6	17.46	17.68	16.62	17.4	17.62	17.79	18.25
1/P21926				15.36		18.06					17.61				15.62			16			15.64			15.76							15.67	16.44							15.51	15.64					16.29
1/P21953	15.03	15.14						14.56		15.23		14.99	15.13	15.19		15.48	14.83		15.07			15.23	15.28		14.56			15.43	14.85	15.45				13.6	15.14		15.37						15	15.27			15.19	15.55	15.22
1/P21964	15.62	16.83	15.34		14.95	15.14	16.94	15.95	15.98	15.78	15.32	16.56	16.03	16.46	16.55	16.9	16.55	15.89	16.73	17.4	15.09	15.86	16.78	15.63	15.92	16.28	15.51	16.57	16.12	15.95	16.54	15.41	15.91	15.91	15.77	15.03	17.05	15.5	15.89	16.09	15.66	15.58	16.82	17.11	16.44		16.7	16.48	16.18
1/P21980	18.29	18.58	18.01	16.85	18.16	16.55	17.27	17.59	16.6	18.11	16.12	16.99	18.25	17.43	21.68	17.92	17.84	19.81	17.56	17.5	19.2	18.12	17.23	19.4	17.92	17.27	18.2	17.47	18.24	18.4	19.89	17.24	17.97	18.49	17.74	16.63	18.62	18.19	17.92	17.98	19.86	18.48	17.93	17.82	18.11	17.05	17.29	18.85	17.67
1/P22033	18.42	17.68	17.95	17.85	18.02	15.68	15.8	17.81	16.2	18.13	15.53	17.63	18.86	18.14	15.94	18.45	18.49	15.85	18.3	16.91	14.77	18.16	18.33	18.61	17.42	17.92	16.75	18.33	17.82	18.2	15.6	15.04	14.98	16.72	17.45	16.56	18.52	14.74	15.29	16.83	15.62	16.85	18.3	17.85	16.06	16.13	18.63	18.01	18.55
1/P22059					14.22										14.37	13.77	13.46			14.4							13.99		13.45						13.43	14.63	13.94							13.37		14.08
1/P22061	15.88	16.07	16.48	16.61	16.91	16	15.77	15.52	15.86	15.89	16.02	16.16	16.23	15.92	16.27	16.18	16.08	16.26	16.17	16.12	15.85	16.11	16.34	16.06	15.89	15.91	16.42	16.23	16.06	16.06	16.32	15.5	16.24	15.75	16.07	16.5	15.73	15.73	16.29	16.04	16.11	15.81	15.9	16.43	17	16.16	15.85	16	15.93
1/P22087	14.75	14.95				14.72		14.91	15.62		15.07	15.54		13.94	15.12	15.11				15.32	14.9		15.34	15.25	14.53		14.83		15.3	15.07	15.52	14.73			15.27	14.48	15.3	14.97	15.14			14.52		15.29		15.23	14.56	14.92	14.58
1/P22090																																															16.19
1/P22102	14.64	14.72	14.42	15.5	14.7	14.92	14.94	14.75	15.01	14.44	15.25	14.43	14.99		15.94	15.13	14.88	14.81	14.28	14.54	13.3	14.33	14.56	14.56	14.67	14.37	14.63	14.84	14.53	14.66	14.21	14.94	14.66	14.46	14.91	15.1	14.66		14.61	14.87	13.99	14.63	14.97	14.83	15.35	15.01	14.73	14.91	14.61
1/P22105	15.74	15.95				15.55		16.62		15.93		16.01	15.99	16.36	16.17	16.07	17.5	16.43	16.02	16.98	16.27	16.15	15.64	16.82	16.44	15.73		15.95	15.8	16.39	17.43		16.75	16.66	15.24		15.91	17.53	16.56	17.09	17.39	16.38	15.78	15.77			15.91	16.31	15.55
1/P22234	15.4	16.03	15.84	16.71	16.06	15.1	15.74	15.74	15.71	16.14	15.45	15.95	15.62	15.63	15.98	15.55	15.52	15.72	15.85	15.88	15.11	15.63	15.75	15.79	15.41	15.95	16.07	15.91	15.93	15.67	15.4	15.57	14.87	15.59	15.94	15.48	15.71		15.09	15.49	14.98	15.44	15.88	15.88	16.26	15.42	15.43	16.22	15.75
1/P22307	16.96	18.82	18.98	19.04	18.97	16.17	16.24	17.69	16.84	17.54	16.31	18.19	17.45	18.4	16.25	17.63	17.54	16.35	17.71	17.18		17.33	18.75	17.64	17.63	18.12	17.52	18.58	17.81	17.57	16.01	15.74	16.11	16.74	18.09	16.66	17.21	16.14	16.32	16.74	15.73	16.61	18.49	18.09	16.81	18.01	18.39	18.68	17.56
1/P22314	17.94	16.87	17.28	17.72	17.54	17.8	18.45	17.07	18.92	18.27	18.24	16.84	16.56	16.47	18.47	18.24	17.55	17.71	18.01	18.14	16.42	18.26	16.8	17.57	17.27	16.82	18.21	18.23	17.68	17.27	17.42	17.29	17.51	17.37	16.83	17.72	18.5	16.76	17.72	17.7	17.4	17.24	17.96	17.48	17.6	17.19	16.66	17.12	16.72
1/P22352	16.51	15.42	15.63		15.31	17.62	16.18	16.98	17.14	16.17	17.86	15.19	15.72	15.89	18.24	15.15	17.19	19.87	15.63	16.87	18.34	16.29	15.76	18.39	15.71	15.36	16.85	15.55	16.37	16.58	15.6	15.44	18.76	18.63	15.46	16.15	15.85	17.5	18.9	18.96	19.04	18.59	15.78	15.52	19.48	15.34	15.98	15.9	15.42
1/P22392	15.28	15.77	15.93	16.58	16.47	15.88	15.9	16.17	16.26	15.59	16.18	15.31	15.6	15.45	17.41	15.34	15.53	17.44	15.51	17.11	15.43	15.39	15.61	15.82	15.02	15.61	16.55	15.7	16.78	15.39	16.45	17.63	16.49	16.3	15.99	15.48	15.53	15.74	16.17	16.33	16.05	16.34	15.97	15.7	16.48	15.86		15.54	15.21
1/P22413	14.49									14.36				14.45								14.45	14.6		13.6			15.06			13.86												14.15	14.28			14.4		14.37
1/P22570	16.4	16.06	15.62	17.34	15.87	15.32	15.91	15.69		16.32		15.82	16.19	16.07		16.02	15.94	16.8	15.69	16.56		16.21	16.34	15.85	16.07	16.3		16.54	16.42	16.28	15.39	15.56			16.32	16.17	15.92	15.31		15.74		15.58	16.02	15.91	15.58		16.27	16.61
1/P22626	14.9	15.68	18.52	17.12	17.36	16.13	15.74	16.76	17.12	15.32	15.73	15.12	15.41	16.07	15.85	16.3	15.9	17.19	16.07	17.36	15.69	15.2	16.06	16.18	15.69	15.75	16.77	14.45	15.69	15.01	16.85	17.18	17.09	15.66	15.34	16.6	15.75	16.82	17.16	16.33	16.46	15.84	16.19	15.74	16.97	16.8	15.63	15.76	15.24
1/P22670			16.4												16.74				13.88						15.39			14.89					14.55	13.72								13.94
1/P22676						19.9					18.22				18.62		17.25	17.93			20.06										18.49		19.42						19.31	18.97		16.78			19.7
1/P22681													16.92													16.09		16.27																			16.05	15.99
1/P22694	13.54		13.73	13.56	14.5	13.19		13.51	14.8	13.23							13.89	13.8	13.14		13.82	13.31		14.08		12.85		13.87		13.05	14.08		13.26		13.7			12.98			13.64		13.27	13.52	13.96	14.73	13.54	13.6
1/P22695	17.15	17.04	16.66	17.72	16.52	16.32	16.33	17.14	17.07	16.9	17.12	16.54	16.58	17.04	16.89	17.21	16.75	16.04	16.62	16.78	15.71	16.77	16.77	17.1	16.62	16.47	17.25	16.79	16.53	16.85	16.38	16.53	16.36	16.86	16.44	16.07	17.1	16.23	16.38	16.97	16.38	16.74	16.97	16.72	16.6	17.37	16.74	17.33	17.41
1/P22748				14.43																						14.54
1/P22792	16.21			16.63	17.01				18.38						17.18		16.58	16.88		17.15		16.27							16.22	16.3		16.04	17.54						17.53						16.86	18.12		16.78
1/P22830	15.51	16.45	16.62	15.46								15.94	15.72			16.07	15.57		15.68			15.38	16.19		16.07			15.59		15.96				15.58	16.11		16.24			15.19		15.59		15.92			16.03	16.48	15.88
1/P22891
1/P22894																													14.65		14.67							14.57
1/P22897	16.03	15.89								15.68						16.05			15.76		15.81	15.66	15.54														16.35									16.16	15.39	15.72
1/P23083	16.3	15.2			15.5	16.27	15.72	15.53	15.02	16.4	17.19	15.3			16.62		15.57		15.25	15.58	16.99	16.39	15.29				15.1		15.18	16.55	16.4	17.18	18.64	15.52				16.3	18.66	15.56	16.43	15.26	15.28		17.35			14.82
1/P23141	22.19	17.37	19.75	21.83	20.48	16.99	15.47	20.97	21.15	22.33	16.54	22.23	22.22	21.8	19.14	22.69	21.66	16.78	21.88	20.04	15.54	22.15	22.87	20.1	21.85	22.47	22.01	22.75	22.8	22.2	17.73	15.41	18.27	18.88	17.45	20.08	20.53	17.48	18.48	23.61	17.3	18.58	22.38	22.25	19.97	21.63	22.33	22.59	22.97
1/P23142	15.29	14.96	14.89	15.17	15.45	17.28	15.8	16.2	14.85	14.79	16.68	14.75	15.12	15.27	16.26	15.13	16.68	16.93	14.8	17.6	18.24	15.06	15.4	16.26	15.97	14.66	15.64	14.6	16.21		17.96	16.55	18.01	16.57	14.94	15.35	16.32	17.33	18.01	16.95	18.17	16.59	15.33	15.05	18.17	18.8	15.16	15.31	15.06
1/P23193			15.02	15.63	15.32			15.38	16.11									15.29		15.57				15.04			15.11		14.44			14.75	15.15			15.45			15.29						15.42	15.08
1/P23219															15.16
1/P23229	17.4	17.2					16.64	16.98	16.24			16.72		16.83			16.72	15.84		16.75		17.29	16.97	17.76		16.67	16.99	17.08	18.11		15.75	16.56	16.52								15.78				17.6	16.01		17.25	16.46
1/P23246	16.44	16.21	16.8	16.73	17.74	16.63	16.37	17	17.9	16.25	16.57	15.71	15.75	15.84	17.52	16.07	16.26	17.22	15.67	17.27	16.67	16.2	16.11	17.33	15.77	16.02	16.87	15.87	16.37	16.3	16.87	16.91	16.84	16.39	15.94	17.48	16.12	16.08	16.61	16.21	16.17	16.37	15.72	16.13	16.97	18.22	15.62	16.61	16.23
1/P23258															15.65
1/P23284	16.53	17.02	16.86	17.38	16.57	15.65	15	17.1	16.68	16.44	15.03	16.74	17.46	16.73	17.28	17.28	16.84	16.8	16.94	17.93	16.68	16.49	16.71	17.25	16.79	16.54	17.43	16.29	17.78	16.49	16.72	17.48	16.98	17.28	16.82	17.07	17.27	16.32	16.91	17.1	16.79	17.22	16.9	16.69	17.32	17.02	16.32	17.31	16.61
1/P23297															16.36														14.86
1/P23368	15.6	15.88	16.95	17.46	17.05	15.78	16.38	16.48		15.52	16.8	15.84	15.54		16.09	15.01		16.85		16.63	15.57	15.83		15.93			15.56		15.49	15.95	15.7	15.88	16.17	15.72	15.81	16.59	15.73	15.93	16.16	15.98	15.71	16.16		15.47	16.75	16.07		16.37
1/P23378	15.85	17.2	16.28	15.74	16.61			15.97	16.9	16.16		17.25	18.3	16.7		17.63	16.87		17.6	16.1		15.89	16.59	15.98	15.73	17.41		16.69	15.94	15.91	15.33		15.32		19.13	15.59	17.33	15.1	15.2		15.41		16.46	18.87		15.46	16.25	17.05	16.9
1/P23381	16.5	16.44	16.17	16.44	16.94	16.32		16.75	17.3	16.53	15.94	16.08	16.29	16.21	16.6	16.36	16.55	17.45	16.33	16.55	16.64	16.48	16.37	16.17	15.7	15.93	17.57	16.16	16.82	16.55	16.52	16.64	17.92	17.24	15.98	16.25	16.46	16.49	17.94	17.11	16.79	17.36	16.49	16.37	17.81	16.52	16.37	16.52	15.92
1/P23396	16.86	18.13	18.77	17.99	18.11	18.09	17.04	18.12	16.77	17.79	18.48	17.52	16.31	18.24	18.77	16.98	17.33	17.07	17.64	19.13	17.79	17.72	17.65	17.78	17.41	16.98	17.86	16.39	18.36	17.96	17.4	16.97	18.53	16.7	17.42	18.24	17.67	18.04	18.36	18.22	17.4	16.67	17.1	17.94	18.6	18.74	17.5	17.19	17.76
1/P23434	15.01	15.13	15.4		15.42					15.27		14.83	16.56	15.28			15.17		15.52			14.94	16.1			16.18	14.65		15.31						16.14		14.93						16.92	15.61			15.74	14.87	15.07
1/P23443			16.53		16.65			16.97	16.99	16.04	16.73				16.94		15.98			17.21	16.58	16.18			15.73		16.49		15.96	16.09	16.53		17.16			17			17.11	16.6	16.23	15.63			16.7	17.61
1/P23469								16.19					15.77
1/P23497															15.87						14.3								14.44				14.38			14.71			15.15							15.31
1/P23526	17.26	17.93	18.41	19.36	18.69	17.41	16.92	17.29	16.91	18.18	17.66	17.74	17.7	18.5	17.94	17.55	18.28	16.92	18.69	19.7	16.19	18.31	18.12	18.41	17.14	18	18.37	18.11	18.05	18.24	16.78	17.36	16.85	17.66	18.31	18.06	18.49	16.61	17.16	18.48	16.82	18.12	18.03	18.2	17.76	17.62	17.62	18.02	18.16
1/P23528	16.23	16.64	17.62	17.36	17.89	17.86	18.69	17.04	18.6	16.31	18.51	16.41	16.09	15.93	17.96	16.73	16.92	17.81	16.38	18.29	17.22	16.39	16.19	16.66	16.73	16.25	17.55	16.27	17.49	16.46	17.68	17.71	17.73	17.05	16.01	18.16	16.3	16.74	18.15	17.17	17.85	17.38	16.16	16.6	17.83	16.72	16.3	16.83	16.12
1/P23588			15.86	16.54	16.83															16.43				15.83					16.03			16.1				16.54				15.93			15.67	15.81	15.78
1/P23610																	16.2
1/P23634											16.32										15.68						16.03												15.86						16.09
1/P23677				15.59					15.95																																	15.65
1/P23743
1/P23786	16.32	16.92	15.73	17.33	16	15.15	15.55	16.45	15.18	16.47	15.77	16.8	16.65	17.33	15.7	17.65	16.11	15.57	16.7	15.14		16.37	17.05	16.13	16.1	16.59	16.05	16.68	15.58	16.41	15.01		14.68	16.1	17.2	14.97	17.06	15.52	15.05	16.63	15.65	16.32	16.71	16.12	15.3	16.1	16.99	17.41	17
1/P23919		15.13	15.07	15.43	15.28		16.23	15.3	15.45					15.12	14.96			15.47		15.43			14.69	15.04			15.78					15.34	15.14	15.62		15.78	15.27		15.04	15.37		15.85			15.52	15.79		15.5
1/P23921																																16.04									15.63
1/P23946							15.04										14.04
1/P24071							15.83
1/P24158	13.83	13.9					16.97			14.12	14.5				15.76					14.48	14.73	13.85							14.51	13.81	16.01						13.83	16.32			16.01		14.87		14.48
1/P24298	17.15	16.55						15.23	16.35	17.74		18.11	17.75	17.83		16.99	16.97		17.32	14.82		17.85	18.48		16.2	18.47	15.95	17.61	17.07	17.71				14.5	18.15		16.93						18.67	18.01			18.28	16.28	17.47
1/P24385																																										16.04
1/P24386
1/P24390				15.92
1/P24534	18.39	17.33	17.37	17.74	17.68	16.91	16.47	17.46	17.45	18.3	16.67	16.84	17.77	17.15	18.22	17.17	17.31	17.74	17.89	18.03	16.28	18.36	17.69	17.74	16.6	17.87	18.04	17.95	17.95	18.37	17.54	17.28	18.12	17.49	16.7	17.57	17.09		18.13	17.33	17.61	17.55	18.13	17.1	17.79	16.79	17.72	17.56	17.26
1/P24539	17.09	17.5	17.29	17.36	17.14	16.8		17.59	16.46	17.3	16.71	17.31	16.36	17.82	17.03	17.51	17.11	16.07	17.35	17.22		17.17	17.48	16.57	16.96	17.49	17.1	16.57	16.63	17.27	16.29	16.49	16.84		16.99	17.09	17.78		16.86	16.87	16.57	16.23	17.24	17.46	16.95	17.57	17.32	17.72	18.05
1/P24557		14.77				15.65	15.09	15.11		14.86	15.9			14.76	14.9		14.92				14.91	15.27								14.84	15.21		15.34				15.03	14.88	15.38	14.96	15.24				15.25			15.14
1/P24666		16.41	16.85	17.01	17.08		16.83	16.72	16.2	16.45	16.81	16.17		16.25	16.95	16.93	16.18	17.24		17.02		16.48	16.14	18.05	16.03		17.12	16.04	16.52	16.57		16.76	16.63		16.28	17.09					16.07		16.31	16.59	17.06	16.5	16.21		16.29
1/P24752	20.52	20.96	18.88	19.97	18.82	17.16	17.25	19.93	19.16	20.22	17.32	19.87	20.6	20.2	18.92	20.06	19.97	17.98	20.44	19.23	17.02	20.27	20.28	19.79	19.89	19.64	18.81	20.5	18.79	20.39	18.44	16.13	18.57	19.17	20.79	18.95	20.82	18.14	18.64	18.85	18	18.82	19.65	19.99	19.37	19.06	20.17	21.14	20.08
1/P24821	15.48	15.16				18.14	15.39	15.8	16.16	15.75	18.76		15.63		15.55		15.99	18.11			17.34	15.69		15.8	15.2	15.14				15.52	16.96	19.82	17	16.04				16.89	16.91		17.17	16.18	16.16	15.2	19.38
1/P24844						15.21					14.66			14.4	15.08		15.04	15.19		15.4	16.86		14.04	13.94			13.63		13.79	13.75	14.83	15.5	15.93			14.27	14.62		15.87	15.5	14.86				15.8	14.66
1/P24928			18.72	18.27		17.91	19.49	18.82	20.42	17.72	19.05				18.6	17.6	18.52	19.93	18.39	19.67			16.64	19.25	17.71	17.61	17.91		16.84	16.83		19.69		18.76	18.74	19.35	18.39		17.37	17.81		18.7	17.79	18.26	19
1/P24941																																													13.03
1/P25054
1/P25098	16.51	16.71								16.6												16.67
1/P25205	16.35					17.43	17.59			15.91	16.14	16.41			16.26				16.7		17.42		16.65			16.47			16.95		17.99							19.09	16.46		18.08			16.89
1/P25208							15.4							15.29	15.16		15.49							15.54															15.27
1/P25311	14.89	15.47	15.76	15.44	16.14	15.32	15.45	14.75	14.85	15.49	15.46	15.64	15.72		15.69	15.38		15.55	15.36	15.24	14.68	15.11	15.79	15.52		15.78	14.91	15.55	15.99	15.18		15.14		15.54	15.22	14.72	15.38	14.95		15.15	14.38	15.5	15.66	15.66	14.8	15.78	15.44	15.4	15.68
1/P25325	17.87	18.43	18.06	18.42	18.53	17.2	16.46	17.95	16.85	18.48	17.19	18.29	17.52	17.81	17.36	19.16	17.61	17.03	18.09	19.21		18.52	18.59	18.16	17.87	18.21	18.49	18.14	18.26	18.39	17.57		17.22	17.35	18.16	18.24	18.18	16.17	17.28	17.15	16.33	16.61	18.19	18.58	18.51	17.72	18.07	18.05	17.76
1/P25391			18.58	16.31	17.37		18.13							15.92				15.57																											16.26
1/P25398	16.44	16.57	17.85	17.34	17.45	16.53	17.8	17.34	17.25	16.56	17.1	16.26	16.92	16.73	17.08	16.78	16.54	17.55	16.93	17.52	16.48	16.55	16.41	17.28	16.36	16.36	17.35	16.15	17.32	16.62	16.66	16.81	16.12	16.68	16.74	17.86	16.71	15.87	16.86	16.65	16.24	17.11	17.07	16.31		17.67	16.27	16.93	16.59
1/P25440	16.89	16.84	16.82	16.86	17.15			16.88		16.69		16.74		16.94		16.53			16.3	16.88		16.66	17.06		16.16		18.26	16.65	17.24	16.79				17.15		16.04				17.49		16.94		16.24			16.84	16.65	17.01
1/P25685		15.51	15.83	15.82	15.54		15.09	15.9		15.19	15.57	15.09	15.25	15.4	17.2	15.48	14.99	15.38	15.04	15.78		15.44		15.45	15.34		15.93		15.44	15.44		15.33	16.17			15.42	15.37		16.33			15.09	15.03	15.04		16.25	14.77		15.18
1/P25705	21.01	21.76	21.17	22	21.03	20.47	19.89	22	20.51	20.9	20.33	20.88	20.95	21.48	20.78	21.33	21.12	21.12	20.97	21.37	19.64	20.83	21.31	22.01	20.78	21.12	21.35	21.13	20.71	20.94	20.16	20.37	20.18	20.33	21.13	21.28	21.51	20.04	20.32	20.9	20	20.24	21.17	21.2	20.24	21.42	21.27	22.12	22.22
1/P25774		16.42			16.93	15.45		16.96							16.97	17.1	17.23			17.25	15.27	16.58					17.1		16.69	16.59			17.6	17	17.18	16.78				16.85	16.17	17.08			17.11	16.87
1/P25786	15.41	15.94	15.8	16.49	15.99	15.43	14.75	15.49	16.3	15.76	15.68	15.72	15.91	15.76	15.83	15.24	16.36	15.75	15.84	15.98	15.34	15.81	16.04	15.64	15.45	15.91	16.15	16.24	15.8	15.83	15.4	15.63	16.12	15.95	16.05	15.81	15.59	15.32	15.95	15.63	15.33	16.01	16.13	16.15	15.93	15.77	15.75	16.21	15.76
1/P25787	16.1	16.4	16.17	16.74	16.82	15.91	15.63	16.05	17.1	16.24	15.82	15.97	16.38	15.63	16.64	15.62	15.96	16.58	15.76	16.94	15.46	16.09	16.37	16.13	15.62	16.33	16.9	16.32	16.36	16.24	16.74	15.77	16.48	16.46	15.88	16.3	15.96	16.1	16.61	16.11	16.19	16.21	16.11	16.63	16.2	16.63	15.84	16.39	15.84
1/P25788	16.99	17.68	18.01	18.28	18	16.94	15.95	17.36	17.78	17.59	17.3	17.23	17.16	17.28	17.66	16.35	17.48	16.99	17.18	17.89	16.88	17.53	17.6	17.09	16.37	17.36	17.58	17.11	17.47	17.29	17.35	16.97	17.71	17.33	17.64	17.6	17.12	17.3	17.82	17.59	17.05	17.28	17.71	17.69	17.59	17.47	17.25	17.44	17.05
1/P25789	16.79	16.64	16.41	17.52	17.08	16.39	15.95	16.5	17.76	16.7	16.28	16.69	16.7	16.93	16.89	16.3	16.88	16.89	16.81	17.09	16.01	16.76	16.65	16.53	15.83	16.99	17.57	16.86	16.74	16.65	16.57	16.63	16.85	16.76	16.97	17.09	16.74	16.58	17	16.61	16.69	16.93	17.08	16.9	16.95	16.69	16.8	17.09	16.47
1/P25815						19.37	20.28				20.86				20.31									17.07									19.34						19.48		17.56
1/P25940																																													17.69
1/P25942							15.84																	15.2												16.45
1/P26006	17.83					19.18	19.54			17.15	18.04		17.25	17.93		18.3	18.41		18.42		18.87	16.85	17.97	18.13				17.8	18.14		19.55		18.21		17.92			20.58	18.11				17.96	18.11	17.92		17.97	16.67	17.47
1/P26010																									17.1
1/P26022							15.03
1/P26038	16.67	16.62	16.11	16.34	16.33	16.56	16.07	16.98	18.27	16.5	15.81	15.93	16.24	15.84	17.46	16.63	17.14	17.61	16.34	16.95	17.06	16.68	16.53	16.13	16.26	16.34	16.71	16.11	17.29	16.68	17.7	16.97	17.8	16.84	15.84	16.87	16.58	17.02	17.98	17.17	17.5	16.79	16.57	16.71	17.93	16.7	16.43	17.1	16.1
1/P26045		17.08	17.94						17.26						17.34					18.34				18.13	18.2								17.6	16.98					17.64							18			17.86
1/P26196	15.79	15.71	16.17	16.61	16.55	16.57	16.64	16.51	16.79	15.93	16.62	15.28	15.17	15.59	18.16	15.86	16	16.66	15.77	17.4	16.19	15.8	15.64	16.92	15.51	15.4	16.2	15.58	15.96	15.91	16.29	17.29	16.45	15.64	15.68	16.57	15.52	15.39	16.45	16.05	16.37	15.95	15.52	15.74	16.96	16.57	15.53	16.2	16.05
1/P26232	14.78	15.06	15.11	15.98				15.69				15.38	15.29	15.35	15.59		15.57	16.44	15.44	16.39		14.85		16.61		15.23	15.97	15.27	15	14.92					15.23	17.29	15.1				15.33		15.85	15.8				15.42	15.58
1/P26358				17.04	17.21												16.01		16.12								17.39			16.42		16.68		16.8		16.96						16.78
1/P26368	15.89	16.04	17.11	17.68	17.72	16.26	16.33	16.62	17.77	15.95	16.2	15.37	15.5	15.67	18.02	15.77	16.21	17.17	15.74	17.39	16.53	15.95	15.66	17.22	15.48	15.31	17.05	15.41	16.67	15.91	17.16	16.79	16.85	15.81	15.13	17.46	16.14	15.48	16.71	16.32	16.12	16.06	15.55	15.69	17.34	17.61	15.59	16.37	16.04
1/P26373	18.6	18.51	18.9	19.22	19.1	17.92	17.43	19.2	19.13	18.45	18.18	17.65	18.35	18.19	18.89	18.18	18.32	19.08	18.13	19.31	18.06	18.53	18.19	19.49	17.77	18.1	18.82	18.07	19.03	18.52	18.41	18.32	18.6	18.56	17.96	19.42	18.56	18.09	18.79	18.32	18.27	18.46	18.19	17.99	18.43	19.46	18.12	19.22	18.75
1/P26374					15.56
1/P26440	17.79	17.5	15.93	16.51	16.05	15.59	15.76	16.91	16.73	17.34	15.78	17.16	16.77	17.27	16.62	16.84	17.25	16.26	17.59	16.56	15.42	17.3	17.83	16.57	16.57	17.28	16.46	17.02	16.77	17.48	16.15		16.49	16.54	16.76	16.08	17.68	15.74	16.48	16.77	16.09	16.16	17.28	17.4	16.42	16.26	17.88	17.39	17.17
1/P26447	15.83	16.6			15.53	18.46	16.88	17.67	17.97	16.16	18.86	15.67	15.74	16.09	17.14	16.15	17.05	17.56	15.58	17.79	18.46	15.84	16.09		15.96	15.77	16.82	16.03	16.87	16.02	18.2	16.74	19.3	17.38	16.05	16.25		18.34	19.52	17.33	18.14	17.44		16.45	17.96	16.05		16.91
1/P26572		14.61	14	14.24	14.84			14.62		13.72					14.22		13.47			14.33	13.36	13.62		14.49			14.49	13.54	14.11			14.21				14.57				13.67	13.33					14.39		14.74
1/P26583		14.65	16.34	16.49	16.52	14.67	14.52	15.22	16.99					14.39			15.04	15.02		16.34	15.49						15.01	14.27	14.79		15.26	14.48	16.48	15.16		14.8	14.69	15.65	16.44	15.09	15.03	15.19		14.34	15.92	15.59		14.69
1/P26599	16.72	16.88	18.13	18.39	18.39	16.95	17.38	17.56	18.36	16.67	17.4	16.6	15.99	16.22	18.09	16.82	16.79	18.13	16.34	18.63	16.37	16.64	16.59	18.35	16.57	16.48	18	16.66	17.3	16.78	17.17	17.52	17.63	16.44	16.36	18.33	16.91	16.59	17.8	17.08	16.75	16.24	16.35	16.86	18.16	18.55	16.11	16.74	16.67
1/P26639	15.9	15.99	16.11	16.11	16.34	18.16	15.47	16.05	15.74	16.04	17.04	15.9	15.39	15.91	16.69	15.56	15.86	16.13	15.72	16.74	15.82	16.15	16.2	16.13	15.83	15.63	16.17	15.21	16.56	15.94	16.9	15.94	16.72	15.51	15.66	16.78	15.95	15.76	16.72	17.76		15.48	15.86	16.32	17.53	15.63	16.05	15.7	15.83
1/P26640	16.02	16.01	15.38	16.68	16.02	16.09	16.26	16.99	16.93	16.21	16.44	16	16.13	16.26	16.73	16.08	16.25	16.62	16.04	16.89	15.47	16.17	16.03	17.53	15.84	16.14	16.91	16.32	17.15	16.03	16.2	16.39	16.67	16.9	15.7	17.07	16.28	15.86	16.48	16.64	16.05	16.84	16.36	15.82	16.91	15.54	15.91	16.4	16.11
1/P26641	17.48	18.37	18.44	19	19.49	18.62	18.3	18.9	18.27	17.94	19.32	17.25	16.99	17.85	19.51	17.75	17.54	18.55	17.54	19.41	17.34	18.06	17.52	18.87	17.37	17.1	19.06	17.74	18.97	18.02	18.31	17.9	18.97	17.95	17.52	19.31	17.93	17.68	19.1	18.58	18.06	17.83	16.94	17.77	19.57	18.08	17.31	18.07	17.53
1/P26885	18.14	17.76	18.67	18.4	18.44	15.76	15.87	17.53	17.03	18.21	16.09	18	18.22	17.88	17.13	18.3	17.64	17.09	17.67	17.93	15.83	18.17	17.84	17.01	17.52	17.73	18.07	17.62	18.31	18.15	16.61	17.45	17.04	18.14	17.91	16.79	17.54	16.39	16.95	18.2	16.62	18.1	18.36	17.44	17.76	16.88	17.63	18.25	17.94
1/P26927
1/P27105	17.45	17.15	15.41	18.45	15.6	15.66	18.02	16.98	15.97	17.29	15.91	16.58	16.97	16.41	17	16.45	17.01	16.28	16.52	16.49	16.4	17.47	16.84	16.04	16.39	16.79	16.04	16.46	16.91	17.61	16.9	15.79	16.19	15.87	16.24	15.72	16.95	17.07	16.24	15.27	16.9	15.66	16.82	16.61	15.74	16.32	16.97	17.32	17.1
1/P27144	17.24	18.17	17.56	19.51	17.6	16.84	17.68	18.08	16.55	17.23	17.07	18.32	18.77	18.4	16.35	18.81	18.05	18.2	18.6	17.39		16.97	18.45	17.45	18.26	18.64	18.23	18.38	16.44	17.37		14.96	16.22	18	18.33	17.68	18.16	16.09	16.38	18.09	15.83	17.97	18.37	18.48	16.9	18.83	18.46	18.59	17.9
1/P27169	15.21	15.27	13.65	14.29	14.32	13.84	14.42	15.46	13.86	15.43	14.99	16.84	15.32	16.11	13.97	16.2	14.76		16.18	14.44	13.34	15.44	16.64	15.47	15.07	15.68	15.83	15.96	15.66	15.43		13.32	12.85	15.73	15.51		14.89		13.23	16.41	13.77	15.82	15.68	15.44	14.56		16.74	15.19	15.95
1/P27216							15.56							14.75	15.44		14.84															17.51				15.96							14.88
1/P27338	18.48	18.15	18.37	17.33	17.73	16.76	16.93	19.26	16.93	18.94	16.46	18.66	17.67	19.53	16.99	19.03	18.52	17.46	18.73	18.09	16.45	18.91	19.23	18.06	18.93	19.11	18.03	18.07	18.04	18.82	17.33	16.96	16.67	17.3	18.93	17.36	19.23	17.42	16.62	18.11	17.16	17.14	19.13	19.45	16.23	18.53	19.44	18.14	19.87
1/P27348	15.1	15.97	16.81	17.61	17.5	16.71	17.15	16.04	17.25	15.45	17.48	15.48	15.9	15.38	17.16	15.65	16.36	18.25	15.51	17.37	15.81	15.81	15.86	15.62	15.64	15.91	17.05	15.87	16.09	15.5	16.84	17.47	16.67	16.21	15.74	17.81	16.04	16.57	16.58	16.13	16.62	16.02	15.8	16.06	16.63	16.2	15.66	15.78	15.35
1/P27352		15.26						15.13
1/P27361			16.11	15.69	16.28		16.1				15.95							16.12									15.49					15.46	15.79	15.37		15.52		15.9	15.7		15.88					16.56
1/P27448							18.71					17.14				18.09	16.91									17					18.66
1/P27487	14.98	15.34	16.13	16.34	16.28	15.25		15.98	14.36		15.89	15.05			14.88			14.66		17.69			15.72	17.26	14.99	15.2	17.76	15.1	15.94	14.57	15.2		15.02	14.44		17.57		14.74	14.95	14.32	14.83	14.13	15.56	15.2	14.88	17.42	15.87	15.5	15.11
1/P27635	16.65	16.73	16.99	17.16	17.01	16.11	16.57	17.3	17.03	16.42	16.22	16.03	16.92	16.75	16.99	16.76	17.13	17.51	16.75	17.41	16.75	16.25	16.12	17.59	16.14	16.06	16.78	16.32	17.19	16.74	16.56	16.95	16.58	16.78	16.3	17.41	16.77	16.33	16.83	16.84	16.59	16.74	16.6	16.24	16.6	17.63	16.27	16.93	16.47
1/P27658						18.01					15.15				15.98			15.95			16.81			14.69							15.73	15.84	17.65	15.54				14.02	17.73	18.54	15.5	15.84			16.67
1/P27694	15.06	15.24	16.23	16.59	16.32		15.25		16.79		15.24				16.05	15.41			15.03	15.98		15.34	14.9	16.14			15.38	15.16				15.55	15.76			15.9	15.13		15.71	14.97					15.85	15.69	14.99	15.19
1/P27695	16.03	16.23	16.5		17.17	16.67	16.03	16.27	17.72	16.43	16.35	15.93		15.68	17.44	16.25	16.63	16.02	15.89	17.34	16.33	16.42	15.95	17.29	19.7		16.75	16.27	16.27	16.28	16.25	16.76	16.92	16.13	15.76	16.93	16.05	16.16	16.81	16.43	16.39	17.94	15.78	16.2	17.84	17.6	15.74	16.11	15.92
1/P27701
1/P27707		16.15					18.32		17.59						17.46									17.86	17.69								17.41					17.16				18.49							16.03
1/P27708	14.14	13.8	15.38	15.85	16.02	15.14	15.59	14.97	15.21	14.46	15.64	13.7			15.11	13.63		15.9		15.61	14.73	14.22		15.25			14.97	14.08	14.4	14.04	14.77	15.23	15.13	15		16.05	14.01	14.38	15.14	15.03	14.91	14.72			15.76	16.47		14.32	13.82
1/P27797	20.26	20.2	20.54	20.16	20.29	18.37	19.2	19.41	19.79	20.09	18.83	19.02	19.93	19.01	19.95	19.63	19.83	19.17	20	20.59	17.86	19.96	19.55	19.56	19.29	19.88	20.57	19.55	20.57	19.98	19.76	18.48	19.14	19.59	18.91	19.47	19.92	18.91	19.34	19.3	18.97	19.63	20.09	19.24	19.66	19.81	20.03	20.29	19.82
1/P27815													16.68
1/P27816				14.79	14.18	14.74		14.68	14.91		14.67		14.33				14.16	16.05		14.95	15.26		14.09	13.53		14	14.89				14.44	14.7	14.84	14.63	13.81	15.89	13.72	14.75	14.95	14.33	14.74	14.44	14.24	14.5	14.5	13.71	13.75
1/P27824	18.53	18.61	18.89	19.03	19.69	18.61	18.09	19.28	17.77	18.68	18.95	17.97	17.38	17.75	19.07	18.54	18	19.2	17.73	19.36	17.73	18.72	18.08	18.61	18.67	17.8	20.51	17.12	19.61	18.58	17.93	18.02	18.07	18.22	17.51	18.12	18.09	17.13	18.13	18.9	18.1	18.29	17.58	18.04	19.14	19.66	17.71	18.63	18.24
1/P27918
1/P27986					16.55		16.51								16.05			16.39									16.63					16.5														17.07		16.74
1/P28062	16.34	16.98	16.86	17.52	17.53	16.42		16.66	17.31	16.7	16.91	16.3	15.98	16.33	17.19	15.48	16.67	16.53	16.09	16.34	15.68	16.65	16.68		15.69	16.4	17.36	16.37	17.01	16.7	16.58	16.34	17.09	16.99	16.19	15.73	16.03	16.24	17.13	16.74	15.94	16.61	16.4	16.79	17.21		16.39	17.17	16.26
1/P28065	17.33	17.55	18.23	18.09	18.51	17.19	16.43	17.77	18.57	17.38	17.68	16.32	16.94	16.95	17.85	16.49	16.92	17.44	16.62	17.58	16.77	17.38	17.26	16.93	16.13	16.82	18.63	17.1	18.12	17.46	17.15	16.47	18.13	17.92	16.73	17.18	17.16	17.54	18.02	17.89	17.09	17.88	17.27	17.16	18.24	17.49	16.82	17.9	17.11
1/P28066	16.6	16.93	16.96	17.51	17.21	16.64	16.22	16.65	17.53	16.68	16.55	16.45	16.87	16.46	16.97	16.76	16.85	16.98	16.74	17.38	16.24	16.57	16.98	16.77	16.03	16.71	17.42	17.01	16.89	16.63	17.04	16.49	16.95	17.07	16.7	16.85	16.61	16.24	17.07	16.57	16.65	16.77	17.05	17.03	16.73	17.09	16.67	16.87	16.52
1/P28067									15.98
1/P28068
1/P28070	15.02	15.44	15.27	15.75	15.64			15.12	15.47	15.33	15.32	14.9	15.12	15.3	15.51	14.4	15.43	14.96	14.84	15.18		15.33	15.12	14.8	14.01	15.21	15.61	15.18	15.05	15.31		14.89	15.48	15.24	15.58	15.55	14.79	15	15.53	15.09		15.18	15.65	15.57	15.32	15.07	15.1	15.55	15.12
1/P28072	15.77	16.31	15.65	16.97	15.76	15.46	15.39	15.73	16.05	16.04	15.69	16.07	16.14	16.39	15.56	15.8	16.21	15.49	16.14	16.31	15.42	16.21	16.46	16.61	15.12		15.63	16.71	15.7	15.99	15.25	15.94	15.61	15.58	16.55	16.34	16.19	15.63	15.59	15.4	15.5	15.62	16.46	16.38	15	16.46	16.13	16.61	16.33
1/P28074				16.01	16.01			15.61				15.47	15.53	15.71		15.39	15.57		15.79	16.46		15.45	15.54	16.29		15.92		15.65		15.39			15.26	15.21	16.31	16.37	15.61				14.99		15.88	15.79		15.88	15.48		15.33
1/P28161															14.75			15.43															14.41													14.63
1/P28288	16.08	17.03	17.31	16.03	17.32	14.98	15.48	16.81	14.81	16.08	15.31	16.23	15.25	16.95	14.42	16.47	16.47	14.97	16.18	15.61	13.8	16.39	16.77	15.58	16.69	16.28	16.29	16.35	15.77	16.16	15.17	14.93		15.14	16.55	15.6	16.14	14.61	14.82	16.01	15.19	15.4	16.61	16.05	15.31	16.78	16.43	16.84	16.63
1/P28289																																									14.5
1/P28290	16.28	16.26		16.21		16.49	17.27	16.75	18.22	16.22	17.08			16.22	17.02	16.36		17.16	16.11	17.19	16.91	16.05	15.98	16.74	15.76	15.79	16.84	15.98	16.7	16.25	17.53	17.75	17.55	16.26			16.66	17.56	17.48	16.67		16.19	16.2	16	17.18		16.16	16.38	15.78
1/P28331	16.2	16.35	15.89	15.88	16.03	15.52	15.94	16.65	15.86	16.03	15.39	15.78	15.98	16.42	17.13	16.32	15.97	15.75	15.6	15.92	15.69	16.03	16.3	16.52	15.4	16.24	16.07	16.21	16.17	16.11	15.86	15.93	15.74	15.57	15.98	15.92	16.2	15.71	16	15.25	16.06	15.42	16.22	16.2	16.05	16.33	16.31	16.68	16.59
1/P28332	17.63	18.62	16.74	16.33	16.34		15.4	16.55	17.74	17.86		19.27	19.23	18.91		18	18.35	16.21	18.87	16.53		17.8	19.34	16.6	17.54	18.97	15.55	19.2	17.48	17.96	16.09		16.26	17.05	19.08	16.33	16.68	16.51	16.43	16.65	15.92	16.58	19.38	19.17		17.84	19.25	18.45	19.03
1/P28340																												16.82																		15.95
1/P28370											17.17						17.52				19.45											17.61							17.97		18.63	16.77
1/P28482		16.63	17.09	17.62	17.11	16.79		17.37	17.36	16.73	16.94			16.55	17.08		16.69	17.28		18.16	16.44	16.41		17.61	16.4		17.56		16.42	16.44	16.84	16.52	17.35	16.59		17.71	16.31	17.08	17.09	16.66	16.62	16.33		16.42	17.35	18.16		16.73
1/P28676		15.24	15.34		15.01	15.52	18.96	14.89	16.32	14.88	16.96				17.64		14.82	16.16		16.14	15.92	14.93			14.42		15.05		15.17	14.94	16.45	15.31	16.05	14.37		16.52	14.97	15.82	15.61	14.68	16.45				16.27	14.7		15.77
1/P28715																																									15.37
1/P28749																																															15.19
1/P28799									18.34																						19.9											18.91
1/P28838	17.31	17.69	15.82	16.84	15.73	15.93	15.98	16.79	17.41	17.41	15.81	16.89	17.73	17.28	15.87	16.38	17.91	16.9	16.88	16.24	15.95	17.56	17.28	15.83	16.4	17.11	17.55	17.35	16.85	17.37	16.57	16.08	17.58	17.74	17.7	15.93	17.03	16.51	17.57	17.51	16.74	17.7	17.74	17.83	16.45	15.5	16.97	18.02	16.87
1/P28845	15.54	17.12	17.5	16.83	17.75			15.71		17.18		18.2	15	16.89		15.76	14.89		16.71			17	17.48	15.22	16.41	15.99		16.5	16.4	17.2	15.09			15.15	16.13		16.88	15.92		15.33			15.82	17.11		17.55	17.26	15.95	17.16
1/P29034	17.06	17.63	18.29	18.95	18.31	17.18		17.63	17.18	18.18	18.1	17.84	17.65	17.94	17.23		17.6	17.03					17.81	18.13	17	18.12	18.02		17.71	17.81	16.9	17.97		17.67	17.89	18.16	18.16	16.6	17.09	18.15				17.93		17.21			17.66
1/P29083								14.51							14.56																					14.64					14.12
1/P29120
1/P29144	16.28		15.43	15.82	15.7	15.53				16.2	16.15			16.36	16.08		15.74	15.63	15.8	15.88	15.1	16.31			15.67	15.52			15.14	16.03	15.29		15.49		16.04			15.22	15.64	14.88	15.17		13.79	16.36	15.86	16.2		16.1	16.31
1/P29218									16.28						16.66			16.48		16.12							16.67		16.22			15.74	16.28			15.82			16.22	15.78		15.83			16.2
1/P29279																																															16.04
1/P29317	17.14					17.48		16.78		16.33		16.57		17.37		17.63	17.47					17.08					17.82	16.91							16.38							17.71	17.4				17.46
1/P29320													16.63																				15.38
1/P29323			15.89					14.48													14.37						14.99						14.61						15.36			14.9
1/P29350	14.64	15.17			14.85		15.78	15.42	18.76	14.79	14.8	14.12	14.29	14.73	15.29	14.65	15.24	15.11	14.52	15.26	14.72	15.18	14.33		14.91		15.66	14.66	15.4	14.87	15.12	14.83	16.07	14.71	13.5		14.91	14.23	16.09	15.38	15.2	14.94		14.65	15.45	15.57	14.78	15.28	14.99
1/P29353
1/P29372			14.52		14.73																																									14.84
1/P29373	16.55									16.06							15.7					16.24			15.32										16.08									16.15
1/P29374																				15.04
1/P29401	16.49	16.94	16.59	17.13	16.56	17	16.87	17.88	18.28	16.57	17.05	16.46	17.33	16.52	17.06	16.47	16.88	18.13	16.54	17.16	15.64	16.55	16.56	16.38	16.02	16.51	18.3	16.33	17.53	16.6	16.07	16.31	18.61	17.67	17.1	17.89	16.66	15.87	18.63	17.58	16.37	17.88	16.89	16.7	18.29	17.64	16.33	17.06	16.64
1/P29466						15.44	14.99				16.65																				14.93
1/P29536								16.98																						16.47			16.74		15.95	16.84								16.69	16.75
1/P29590			16.25			19.89	17.71	19.45			18.84				19.44		19.65	19.71		19.16	21.08			19.3			18.82					19.33	20.65	20.13		20.68		20.37		20.24	20.25	20.38			21.26	18.51			17.65
1/P29597														16.02
1/P29622			14.86		15.58	15.5	14.83	14.75			15.49	13.91				13.87	15.73	15.45		15.06	14.73		14.21	15.29			15.1						14.81	14.67		15.04			14.67	15.11	15.26	14.32			15.25				14.47
1/P29692	17.17	17.05	16.86	17.95	18.3	16.93	15.86	17.98	17.43	17.09	16.2	16.22	16.97	16.94	18.25	17.25	17.04	17.81	17.11	17.92	16.69	17.08	16.76	18.07	16.31	16.73	18.18	16.48	17.92	16.87	17.14	17.12	17.76	17.41	16.36	17.45	17.18	16.7	17.91	17.69	17.08	17.54	16.82	16.87	17.99	17.34	16.72	17.31	16.9
1/P29728																																	15.66
1/P29762	21.92																					21.8						21.01											22.88
1/P29966								14.96										16.01		14.91												15.21		14.57		16.56					15.2		14.42	14.08
1/P29972
1/P29992		14.95	15.06	14.92	15.41	15.7	15.25				15.8	14.21		15.04	15.17	15.38	15.12	14.76	15.03	15.35	15.45			15.01	14.82	14.19			14.82		15.21	15.2	15.01		14.54	14.51		15.25	14.86	14.69	15.44		14.95	14.62	15.05	15.14			14.85
1/P30038	19.19	19.74	17.05	19.24	17.17	16.17	16.63	18.83	17.95	18.93	16.4	19.14	19.45	18.9	16.87	19.69	18.95	17.1	19.08	18.17	16.02	18.89	19.35	18.02	19.16	18.95	18.09	18.96	18.12	19.04	17.83	15.02	17.83	19.03	19.32	17.67	19.11	17.82	17.83	18.51	17.11	18.62	19.44	19.07	18.2	18.83	19.37	20.31	19.18
1/P30039	16.74	17.26		15.28			15.13	15.14	16.5	17.6		17.35	17.12	17.41		16.98	17.14	14.91	17.48	15.25		17.44	18.11	15.37	16.5	17.91	15.49	17.81	15.73	17.58	15.07	16.67	14.71	16.54	18.04		17.02	14.76	14.58	16.5	14.93	16.11	17.28	18.31	16.67		17.62	16.91	17.14
1/P30040	17.31	17.22	17	17.52	17.68	15.89	15.72	17.08	17.37	17.78	16.12	17.28	17.13	16.96	16.68	17.29	16.93	16.4	16.71	16.78	15.4	17.64	17.48	15.66	16.86	17.33	17.2	16.98	17.49	17.59	16.23	16.5	16.12	17.01	16.99	16.77	17.03	15.69	16.4	17.07	16.11	16.81	17.39	17.25	16.85	17.41	17.09	17.44	17.44
1/P30041	17.46	16.13	16.09	18.95	17.54	14.77	15.93	15.62	17.5	16.63	14.95	15.65	18.13	15.69	14.95	17.44	17.19	16.14	16.68	16.18	14.36	16.52	16.78	17.54	16.33	17.65	17.88	18.19	17.25	16.76	16.12	16.38	15.43	16.46	17.64	16.5	16.9	14.3	15.48	14.05	15.69	16.27	18.29	16.28	15.3	16.87	15.71	17.28	16.71
1/P30042	15.98	17.25		17.72	15.73	15.68		16.66	16.47	15.5		16.87	17.68	16.86	15.79	17.02	16.93	15.9	17.31	15.92		15.52	17.18	16.03	15.86	17.2	16.18	16.42	15.59	15.7	15.7	16.32	15.68	17.07	16.76	15.85	17.79	15.97	15.73	16.82	15.83	16.82	17.38	17.01	15.88	16.01	17.31	17.68	16.92
1/P30043	16.9	17.72	17.36	17.62	18.07	16.41	17.88	16.44	16.61	17.73	16.69	18.37	16.96	17.26	17.56	18.22	17.26	17.38	17.75	17.62	16.1	17.35	18.19	16.69	17.32	17.88	17.46	16.89	18.71	17.52	17.31	14.56	16.74	17.17	16.94	16.19	17.13	17.29	17.32	16.23	16.71	15.91	17.71	17.63	17.56	18.72	18	16.82	17.53
1/P30044	17.73	18.32	18.3	19.03	19.07	18.6	18.44	18.1	19.21	18.26	19.45	17.99	18.51	17.99	17.72	17.71	18.31	19.49	18.1	19.41	16.69	18.27	18.52	17.64	17.7	17.91	19.66	18.34	18.56	18.06	17.27	18.63	17.82	18.74	18.48	19.1	18.03	17.48	17.88	18.36	17.41	18.47	18.21	18.55	18.43	18.79	18.16	18.2	17.7
1/P30046	21.36	21.83	19.87	21.96	20.94	17.59	16.45	18.09	20.91	21.93	17.17	19.92	21.53	20.65	18.54	20.54	21.27	17.57	19.83	22.24	16.42	21.82	21.79	21.11	18.72	20.66	19.29	21.19	18.96	21.86	17.79	17.34	17.69	19.48	21.04	19.51	20.74	17.14	17.54	19.28	17.55	19.56	21.03	22.29	19.83	20.13	20.99	21.3	21.6
1/P30047	15.6	15.46	16.1	16.11	15.49			14.92		15.94		16.04	15.47	16.36		15.59	15.85		16.58	15.55		16.01	16.27			15.86	15.04	15.11	15.8	16.06					15.41		16.25			14.92			16.68	15.84			15.9	15.41	16.1
1/P30048	20.84	16.66	19.39	19.7	19.37	18.59	18.64	21.05	19.91	20.52	18.38	19.69	19.57	19.95	18.7	19.91	20.21	20.21	20.2	20.35	17.85	20.55	20.64	20.88	19.48	20.12	21.23	20.13	20.31	20.74	19.92	17.96	19.39	20.13	20.01	19.89	20.44	18.44	19.45	20.54	18.88	19.69	20.7	20.04	19.36	20.15	20.56	20.59	20.78
1/P30049	18.32	18.11	18.04	18.6	18.31	17.09	17.73	18.46	18.53	18.12	17.43	17.84	18.5	18.31	17.94	18.52		18.26	17.99	17.98	16.58	17.98	18.02	18.49	17.42		18.72	18.1	17.74	18.04		17.58	17.11	17.49	18.22	18.31	18.35			17.35	16.99	17.66	18.96	18.25	17.02	18.1	17.5	18.4	18.29
1/P30050	17.63	17.18	17.4	17.84	18.15	16.86	17.07	17.76	18.1	17.13	16.9	16.58	17.16	17.12	17.75	17.26	17.45	17.94	17.28	18.27	17.11	17.12	17.06	17.92	16.62	16.93	17.53	16.77	18.03	17.4	17.67	17.76	17.77	17.46	16.82	17.96	17.61	17.05	17.96	17.33	17.33	17.37	17.27	16.98	17.65	18.21	16.96	17.64	17.27
1/P30084	20.2	20.06	17.83	18.94	18.02	18.8	17.9	19.59	18.3	19.8	17.93	19.72	20.26	20.8	16.94	20.7	19.88	18.34	20.5	19.52	16.54	19.63	20.43	19.6	19.21	20.17	18.93	19.51	18.81	19.83	18.46	16.89	18.17	19.97	20	18.94	19.96	18.5	18.56	20.47	17.98	19.53	20.27	19.68	18.77	18.13	20.73	19.9	20
1/P30085	15.25	16.08	15.41	16.8	17.22	16.39	17.65	14.67	16.1	15.33	17.66	16.44	17.03	15.97	16.1	17.19	16.07	16.12	15.87	16.48	14.11	15.39	16.22	15.63	15.76	15.76	16.49	16.7	16.22	15.57	15.27	16.91	14.65	15.32	16.8	16.09	15.94	14.9	14.65	15.34	14.53	14.95	16.09	16.92	16.4	15.54	15.91	15.69	15.14
1/P30086	18.73	18.98	19.31	19.09	19.52	16.29	16.11	17.52	18.87	19.12	15.83	18.98	16.36	19	16.58	18.63	19.6	17.35	19.21	18.94	15.42	19.43	19.16	17.25	18.47	19.27	19.36	19.18	15.94	19.17	17.14	17.3	17.23	18.59	19.32	18.06	18.83	16.96	17.37	17.91	16.66	18.71	19.87	19.42	17.13	18	18.78	18.75	18.87
1/P30101	19.01	18.91	18.52	18.59	18.54	17.74	17.61	19.06	18.5	18.67	17.51	17.96	19.18	18.61	20.04	19.01	18.58	18.86	18.62	19.38	17.92	18.71	18.18	18.65	18.28	17.9	19.65	18.24	19.19	18.74	18.24	18.99	18.48	19.02	18.16	19.89	18.94	17.96	18.51	18.86	18.14	19.06	18.47	18.2	19.23	18.75	18.26	19.22	18.79
1/P30153	16.01	16.75	17.32	17.47	17.62	17.22	17.73	16.84	17.72	16.44	17.38	16.12	16.58	16.65	17.46	16.78	16.67	17.26	16.43	17.74	16.55	16.38	16.62	16.75	16.06	16.26	17.33	16.31	16.65	16.36	16.98	17.4	17.09	17.05	16.35	17.5	16.59	17.14	17.14	16.63	16.74	16.56	16.27	16.63	17.46	17.21	16.16	17.19	16.42
1/P30154				15.93				14.38		15.86									16			15.81				15.61		15.93							15.92		16.02							15.96			15.5
1/P30260				15.27	16.24										16.11		15.17			16.9							15.91
1/P30273		15.06						14.7					15.08	14.55			15.21	15.05	14.63		15.55	15.13						14.57		14.98	15.36						15.89	15.56	15.32		15.5			14.98	15.2	15.33			14.5
1/P30279
1/P30291
1/P30305							16.99																				16.77						16.43													16.39
1/P30307										17.75			17.51									18.13						17.28		17.97																	17.64		18.39
1/P30405												17.5		16.94	15.68	16.2			17				16.45		15.93				17.16						15.52					16.62					17.56		15.61		16.16
1/P30414																	16.7
1/P30419		14.21	15.14	15.03	15.39		15.16		14.87				14.95		15.36	14.25		15.08		15.02		14.53	14.39	14.84	13.53	14.24	15.24		14.7				14.53					13.71							15.46	15.11		14.94	14.08
1/P30504																																													16.46
1/P30519	16.13	15.99	15.49	15.78	16.6	14.93	15.01	16.2	15.5	15.29	15.02	15.28	15.56	15.93	16.2	15.85	15.34	15.66	15.75	15.19	14.78	15.82	15.86	15.4	15.37	15.42	16.17	15.77	16.78	15.77	15.29		15.33	15.54	15.05	15.28	15.78	14.93	15.34	15.92	15.38	15.72	15.7	15.59	15.52	15.8	15.86	16.22	16.18
1/P30520			15.34	14.46	15.52		15.51	14.2	14.78		14.58				15.5			14.81		15.51	14			14.95			14.77				14.62	16.08	14.74			14.8		14.54	14.8	14.29	14.79				15.04	15.29		14.4
1/P30533	15.94	16.14	16.56	16.79	16.76	15.18		16.01		15.67	15.31	15.14	15.63	16.01	15.49	16.05	15.16	15.92	16.02	16.48	15.69	15.85	15.82	16.19	15.4	15.59	16.14	15.16	15.55	15.88	15.75		15.81	15.19		15.59	15.82	15.69	15.59	15.4	15.42		15.85	15.46	15.99	15.19	15.58	16.28	15.81
1/P30536						14.72					15.1				14.81
1/P30566	14.22	14.47	14.54	15.28	14.93	14.69	14.93	14.65	14.71	14.46	15.03	14.17		14.63	14.87		14.55	14.24		15.91		14.14	14.41	15.43	16	14.15	14.82	14.93	14.69	14.46	14.84	13.68	14.8	13.51	14.69	15.52	14.33		14.97	14.43	14.74	15.12	14.21	14.91	15.94	15.03		14.31	14.58
1/P30613	16.51	16.86	16.99	19.49	17.46	14.94	16.46	16.38	16.22	16.62	14.94	18.09	16.93	17.85	16.05	17.27	17.08	16.57	18.23	18.86	15.13	16.16	17.54	17.66	17.39	17.53	17.23	17.06	17.4	16.82	17.56		17.28	18.15	17.72	15.63	16.66	16.84	16.05	17.64	14.87	17.23	17.48	18.49	18.37	18.12	17.4	16.21	17.62
1/P30622					16.18
1/P30626	15.41	14.65	16.92	15.24	17.27	17.57	16.62	15.56	16.62	15.67	17.91	14.41	14.86	14.74	16.09	14.97	16.83	18.8	14.66	15.57	16.2	15.38	14.8	16.55	15.03		15.24	14.68	15.11	15.45	16.45	15.77	16.16	15.27	14.72	15.87	15.52	16.2	16.31	15.57	16.6	15.27	14.49	15.96	16.31	15.33		15.24	15.05
1/P30711																15.03	15.66		15.58	16.02					15.24	15.57			15.61						15.83		15.41						15.77		15.18	16.02
1/P30740	15.7	15.44		15.2	15.4	16.81	18.32	15.88	16.94	15.92	16.89	16.37	15.38		17.16	16.13	15.67	16.05	15.88	16.53	15.83	15.69		15.39	16.67		15.94	14.81	16.27	15.91	16.2	16.03	16.11	15.68		16.49	15.59	15.83	16.13	15.5	16.34	15.66	15.59		16.74	14.84		15.49	15.03
1/P30825	17.44			17.41									17.09			16.71													15.7							16.59									16.22
1/P30837	17.73	16.77	15.7	18.16	15.58	15.99		17.06	15.88	18.29	16.01	17.08	17.34	16.33	15.8	17.83	17.44	15.88	16.78	16.71	15.32	18.23	17.12		17.15	16.68	15.95	16.26	16.25	18.4	16.4		15.69	15.94	17.62	17.01	15.85	15.94	15.6	16.28	16.29	16.07	16.5	17.62		15.52	17.09	16.95	16.58
1/P30838	16.64	16.69		16.41				15.97		16.49						16.34			16.13							16.51	16.79	16.81	17.02	16.66							16.34							16.65				16.92
1/P30876	17.75		17.63					19.27				17.62	18.13	18.38					18.21			17.54				18.34			17.62					19	17.84		18.55							17.44				18.41
1/P31025																																					17.06					17.16
1/P31040	16	16.6	15.67	15.95	16.07	15.57		16.18		16.25	15.71	16.31	15.58	17.12	15.25	16.54	16.21		16.62			16.46	16.04	15.53	15.8	15.73	16.39	16.44	15.58	16.69					16.29		16.88			16.03		15.15	15.76	16.52		15.59	16.11	15.83	16.6
1/P31146	14.83	16.51	14.25	14.11	15.23	16.34	18.52	17.44	22.49	15.55	15.61	14.87	14.58	15.63	16.92	15.61	17.33	15.95	15.57	17.27	18.55	15.71	15.52	14.44	16.14		16.82	14.78	16.4	15.74	17.58	15.05	19.76	16.1	15.21	15.53	15.73	18.38	19.2	18.04	18.14	16.44	14.6	16.09	17.99	15.05	15.26	16.48	14.63
1/P31150		15.95	17.41	16.19	17.25	15.89		15.83	16.71	16	16.07	15.57			16.72		16.1	15.83	15.96	16.71	15.64	15.94	15.78				16.51		16.3	15.64	16.23	16.36	16.76	15.68		16.19	16.21	16.44	16.77	16.07	16.17	15.68			16.09	16.07			15.55
1/P31151																					14.64													14.41		15.63						14.44				14.62
1/P31153	15.17	14.4	15.26	15.26	15.94	14.38	14.85	14.97	15	14.99			14.7	14.53	15.03		14.67	15.3	14.36	15.27		14.75		14.47		14.9	15.27	14.25	14.82	14.63	14.71	14.23	14.66	14.52		14.53	14.71		14.99	14.66	14.58	14.04	14.44	14.42	15.04	14.27		14.76
1/P31323	17.04								17.66																													16.46	18.25
1/P31327	21.26	21.37	19.68	21.23	19.62	16.12	17.52	20.32	19.38	21	16.34	20.2	22.1	20.91	16.25	20.82	20.44	18.28	20.89	18.6	15.91	20.98	21.13	19.74	20.17	21.06	18.79	17.11	20.41	20.94	17.87	15.65	18.41	18.94	20.91	16.63	20.99	18.24	18.75	17	16.94	16.93	21.74	20.56	17.3	20.75	21.09	21.38	21.28
1/P31350				15.36	14.61
1/P31431											15.61						15.15
1/P31483									17.33	16.48												17.35							16.18	16.59						16.53
1/P31512			15.1	16				15.55								15.97	14.96							16.15	15.52																		15.35			15.52
1/P31629	16.25	16.29				18.42		17.92		16.62		16.51		17.13					16.41			16.53	16.79	17.1					16.48	16.9		17.45		18	16.17		17.1			19.07			15.61	16.84			16.73	16.76
1/P31641						16.88									16.24			15.81			16.86											15.35	16.12		14.57					16.13	15.72	15.57
1/P31689		15.6	16.69	15.97	17.17	14.82	15.64	15.71	15.65	15.31	14.9	14.21	15.74	15.51	16.03	15.61		15.02	15.16	15.67	14.55	15.6	15.3	16.01	14.65	14.76	15.63	15.33	14.95	15.3		15.07	14.88	15.15	15.44	15.46	15.39		15.24	15.07	14.65	15.17	15.22	15.44	15.09	18.45		15.95
1/P31749		14.01				13.37				13.31	13.09			13.88		14.13			14.68		13.59	13.86						13.85	13.4	13.72	13.82	15.69	13.67		15.17	15.92	13.88	13.38					13.99	13.94				13.89	15.18
1/P31751		14.11								13.85					14.17					14.11		13.96															13.91									14.8
1/P31930	16.29	16.61	15.02	17.05	15.47	16.4	15.86	17.01	14.92	16.51	17.08	17.33	15.12	17.35	16.02	16.88	15.87	14.85	16.29	16.05	14.65	16.6	16.6	15.65	17.08	16.63	16.77	15.59	16.15	16.62	15.31	14.41	15.72	14.94	16.07	15.22	16.29	15.43	15.76	16.1	15.25	15.1	16.17	16.07	16.02	16.92	17.07	16.09	16.77
1/P31937	18.6	17.4	17.03	17.76	17.19	16.16	15.23	17.13	16.3	18.06	16.27	17.18	17.87	18.09	15.2	17.61	17.3	16.95	18.04	15.67	14.25	18.42	18.25	16.65	16.42	17.69	17.28	17.51	16.27	18.1	15.3	15.15	15.52	15.81	17.43	16.12	17.91	15.63	15.42	16.14	15.69	15.73	18.21	17.5	16.6	16.09	17.57	17.97	17.47
1/P31939	16.05	16.19		17.08	16.49	17.13	17.52	16.72	17.34	16.08	17.46	16.33	16.93	16.53	18.33	16.15	16.07	17.94	16.21	17.68	16.6	16.38	15.96	16.35	15.88	16.44	17.4	16.54	16.52	15.77	16.36	17.41	16.91	17.12	16.87	17.58	16.42	16.36	16.69	16.94	15.93	16.61	16.95	16.51	16.29	16.92	16.04	16.39	16.32
1/P31942	14.71	14.68	15.2	15.23	15.32	15.22	14.57	15.61	16.07	14.64	15.2		14.23	14.49	15.76	14.73	14.91	15.97	14.35	15.57	15.23	14.68	14.39	15.85	14.54	14.4	15.33	14.4	14.3	14.64	15.42	15.39	15.43	14.54	14.24	15.57	14.71	15.24	15.53	14.78	15.48	14.2	14.47	14.75	15.26	15.94	14.56	14.63	14.67
1/P31943	15.83	15.78	17.08	17.26	17.01		16.35	16.29	17.04	15.67	16.38				16.45	16.11	15.31	16.83		16.68	15.98	15.62		16.45		15.48	16.41	15.53			15.97	16.54	16.27	15.84		16.58	15.74		16.36	15.71	15.98	16.15	15.6		16.49	16.8
1/P31944																							14.78																							14.78	13.59
1/P31946	15.75	16.54	16.99	17.64	17.76	17.72	16.89	16.61	18.65	15.97	18.73	15.83	16.48	15.82	16.97	16.21	16.86	18.65	16.03	17.63	16.32	16.04	16.32	16.55	16.22	16.6	17.8	16.39	16.52	15.88	17.31	17.68	17.39	16.98	16	17.78	16.66	17.22	17.19	16.92	17.18	17.1	16.55	16.72	17.18	17.72	16.06	16.6	15.72
1/P31947				15.8		15.52	15.91	14.99			16.29				15.44			14.69		16.22							16.11							15.02		15.4				15.3		14.91			15.47	15.47
1/P31948	15.93	16.16	17.22	17.08	17.5	16.05	16.78	16.76	17.49	16.11	16.16	15.23	16.34	16	17.3	16.46	16.19	17.38	16.08	17.96	15.72	15.88	16	16.46	15.66	15.92	17.74	16.01	16.41	15.73	16.19	16.95	16.93	16.45	16.27	17.05	16.22	15.92	16.84	16.35	16.12	16.78	16.3	15.87	16.82	16.53	15.8	16.36	16.2
1/P31949	14.28	14.77			14.95	18.08	17.06	15.2	15.8	14.96	17.99		15.16	14.18	17.94		15	17.38	14.39	15.33	16.24	15.17	14.54	14.29	14.52		14.29		15.86	14.93	16.62	17.68	16.18	15.22	14.29	14.56	14.81	15.89	16.01	15.38	16.75	15.57	14.48	14.52	16.58	17.99		15.18	14.68
1/P31997							16.04																																15.32
1/P32004																				16.01													16
1/P32019																											14.4
1/P32119	16.8	17.84	18.35	18.25	18.3	17.16	16.57	17.32	16.69	17.87	16.85	18.28	16.56	17.9	17.39	16.94	17.71	15.79	18.06	18.38	16.64	17.76	18.52	16.1	17.66	18.05	18.04	16.65	18.07	17.84	18.12	16.59	17.9	16.41	16.93	17.42	17.69	20.16	18.28	17.35	18.16	16.62	18.14	18.22	18.85	16.88	17.7	16.91	17.61
1/P32189		15.55				15.2				15.48	15.58					15.17						15.33								15.19					15.77		15.42						15.67	15.56			15.23	15.58
1/P32298								16.55												15.7		16.01		15.93	16.39										16.1	15.78	15.98
1/P32320			15.82	15.47	15.33		16.05						15.57										15.29	15.16																			15.45			16.77
1/P32321			16.36		14.62	14.75					14.89	14.85			14.98		14.19		14.26	15.46			14.66				16.59		14.65		14.92	15.27								14.79			14.79	14.68					14.41
1/P32322						14.99	15.02	14.55			15.42
1/P32455	17.4	16.29	16.56	16.14	17.38			15.88		16.45			15.7			15.69	16.16	15.94	15.61			16.52			16.1		16.62	15.52	16.11	16.24	15.41	15.41	16.6	15.9			15.98	15.67	16.93	15.94	15.42		16.27	16.35	16.7	16.05	15.63		15.72
1/P32456			15.63	15.59	16.31		15.51	15.17	14.99						16.04			16.27			14.71			14.72			15.65				14.67	15.14	16.31	15.66		14.91	14.54		16.05	15.24	14.95	15.19			15.74	15.82
1/P32754	17.29	18.61	15.7	15.33	15.71		15.56	16.82	16.83	17.23	18.23	18.41	18.4	18.44		18.39	17.82	15.72	17.99	15.61		17.13	18.12	16.07	17.54	18.6	17.72	18.65	18.36	17.05	15.67		15.82	17.98	17.95	15.55	17.17	16.4	16.05	17.29	15.5	17.19	18.87	17.91	15.97	15.89	18.08	18.58	17.98
1/P32929	16.94	16.8	17.36	16.14	17.6				15.59	17.2		17.21	17.68	17.32	15.22	16.13	16.83		16.89			17.41	17.77	15.39	15.62	17.98	15.18	17.17	16.36	17				15.28	17.45		16.42			15.14		15.1	18.82	17.49		15.54	17.65	16.99	17.07
1/P32942							16.69		17.71
1/P32969	17.83	17.98	18.82	18.53	18.29	17.79	16.68	18.79	18.61	17.72	17.32	16.69	18.36	17.67	18.42	17.57	17.84	18.74	17.88	18.94	17.83	17.56	17.47	18.96	17.03	17.41	18.1	17.56	18.54	17.9	18.06	18.02	18.35	18.18	17.84	19.09	18.06	17.57	18.2	18.06	17.79	18.01	18.08	17.48	18.03	19.01	17.46	18.3	18.2
1/P32970					14.37		14.75	14.2				13.7		13.86					13.9				13.21									14.42		14.42	13.52					13.57		13.83	13.49				13.67
1/P33121	18.36	19.45	18.52	18.77	18.48	14.91	15.47	17.46	16.42	18.74	15.4	18.85	18.34	19.54	14.62	19.38	18.22	14.91	18.75	16.26		18.81	19.23	15.76	18.85	18.56	16.81	19.04	18.12	18.68	15.97	15.29	15.8	16.92	19.93	16.58	18.86	15.58	16.08	17.68	15.79	16.89	19.09	19.23	16.19	17.68	19.22	19.15	19.58
1/P33151																						17.16			16.42																							16.89
1/P33176						18.71	18.74	17.55			18.84				18.72					17.18	18.63						17.54		16.86				18.73			18.08		18.03	18.53	17.91	18.65	18.28
1/P33240			15.57	15.57	16.23				15.5									15.46			14.61			15.35			14.9									15.48										15.45
1/P33241					18.28		17.41	15.6	18.7		16.99							15.75		15.85	15.53			17.96			15.83						16.71						16.51	15.76	15.67	17.68			15.97
1/P33261	15.13									14.88						14.84						14.85			14.59					14.72														14.77					14.98
1/P33316								13.27										14.14		13.65																14.23										13.3
1/P33527	17										16.5	16.27										16.37																	17.25								16.66		16.89
1/P33897		16.29	16.23	17.03								17.02	17.13			16.31			16.71			15.76	16.92			16.93	16.84	17.51		15.6					17.65		16.06						17.14	17.34			16.65	16.32	16.62
1/P33908
1/P33947
1/P33991		15.96							15.91			16.23	15.6				15.48			15.9			16.41	15.96			15.29		15.88	15.93	15.5				16.15		16.11				15.32		15.74	16.11				16.07
1/P33992			16.2	17.18	16.2		15.53	15.51	15.18						16.11					15.55				15.34									15.06			15.87		16.09	14.53						15.88	17.03
1/P33993			15.56	17.08	16.42		15.03		14.32						14.16			13.38		14.82				13.9								13.55				14.82									15.48	16.93
1/P34059																			14.49																	14.8
1/P34096																																												14.96
1/P34896	18.37	18.54	16.46	19.14	16.53		15.29	15.78	17.16	18.11	14.87	17.92	18.88	19.78	15.13	18.08	17.67	15.9	18.4	16.81	15.46	18.01	18.49	17.79	16.89	18.04	15.93	19.71	17.18	18.55	15.3	15.68	16.2	16.53	18.89	15.38	17.46	15.65	15.91	15.35	15.03	15.46	18.37	18.79	17.4	17.72	18.47	18.46	17.94
1/P34897	17.02	16.81	15.7	16.6	16.1	15.78	15.79	16.33	15.72	16.43	16.2	16.56	16.85	16.92	15.77	17	16.41	16.06	16.83	16.01	14.65	16.48	16.74	16.14	16.03	16.4	15.76	16.58	16.48	16.5	15.48	15.54	16.1	16.25	16.83	15.49	17.09	15.57	15.82	15.96	15.57	16.2	16.84	16.66	16.79	16.43	16.52	16.92	16.99
1/P34910																								15.67
1/P34913	18.19	18.1	16.48	18.42	17.06	15.1		16.95	17.51	18.48	15.24	18.59	18.73	18.87		18.67	18.72	14.93	19.05	16.81		18.46	18.6	16.62	18.46	18.81	17.73	19.17	17.41	18.36	15.73	15.47	15.05	16.6	18.79	16.5	17.69	15.28		16.76	15.9	16.7	18.89	19.13	16.82	15.67	17.99	18.38	18.24
1/P34931		15.05	14.97	15.79	15.62	15.25	16.33	15.34	15.03	15.1	14.85		15.07	14.8	15.71		14.84	16.86	14.83	16.69	14.89	15.16	15.2	15.16	14.45	15.06	16.23	15.08	15.09	15.32	15.56	14.57	15.05	15.04	14.69	15.58	14.87	15.4	15.27	15.32	14.96	15.23	14.93	14.91	15.37	15.08	14.87	15.24	15.02
1/P34932	15.7	15.69	16.05	16.88	16.9	16.44	17.08	16.86	17.19	15.6	16.61	14.77	16.19	15.16	16.82	15.87	15.94	17.38	15.29	16.2	15.87	15.66	15.37	16.46	15.63	15.49	17.26	15.72	16.17	15.31	16.19	16.56	15.66	16.54	15.54	16.32	15.22	14.91	15.61	15.9	16.5	16.61	15.52	15.63	15.9	15.64	15.19	16.37	15.42
1/P34949	16.71							16.01				16.28		16.58	16.18	16.59	16.82						16.9					16.53	16.93						16.37						18.13			17	16.31		16.62	16.16	16.63
1/P35052																	15.93
1/P35080					14.96													15.29																										13.68
1/P35219
1/P35221	15.9	15.81		15.74	15.71	16.24	15.32	15.83	15.58	16.13	16.31	15.36	15.13	15.73	16.83	15.45	15.69	15.41	15.53	16.46	15.14	15.85	15.61	15.91	15.28	15.48	16.19	15.63	15.75	16.15	16.26	15.58	15.21	15.4	15.47	16.96	16.07	15.14	14.69	15.54	15.33	14.53	15.55	15.69	15.73	16.06	15.59	15.67	15.67
1/P35222	15.61	15.49	15.12	15.62	15.23	16.03	14.8	15.44	15.09	15.49	15.9	15.21	15.21	15.51	16.16	15.69	15.66	15.61	15.38	15.98	14.88	15.59	15.77	16.15	15.37	15.35	15.46	14.74	15.53	15.73	15.98	14.99	14.98	15.47	14.94	16.84	15.64	15.07	14.99	15.06	15.7	15.07	15.5	15.36	15.27	16.2	15.4	15.92	16.19
1/P35228												15.75					15.56	14.87									15.47	15.65	16.03			14.33			14.37
1/P35232	16.91	17.34	17.47	17.7	17.48	16.77	16.47	18.03	16.08	17.36	17.51	16.72	16.05	17.54	16.99	17.11	16.87	16.87	17.2	17.3	15.8	17.28	17.18	17.93	17.02	17.03	16.96	16.7	16.99	17.57	16.56	16.23	16.47	16.98	17.03	16.25	17.49	16.14	16.28	17.36	16.42	16.76	16.59	17.13	16.95	17.96	17.23	17.43	17.97
1/P35236
1/P35237	15.2	15.35	14.97	15.58	15.83	15.92	15.66		15.79	15.2	16.49	16.1	15.5	15.32	16.31	15.58		15.95	15.38	15.82	15.63	15.48	15.17	15.1	15.21		16.04		15.45	15.28	15.96	15.87	15.72	15.29	15.03	15.29	15.41	15.81	15.8		15.93				15.96	15.09
1/P35240															14.85
1/P35241	14.75	15.24		15.37	15.23			15		17.95		15.03	14.62	15.01		15.3			15.29	15.46		15.12	15.17	15.53	14.9		15.46	15.24	15.29	15.21				15.16	14.98	15.52	18.51		18.11	15.14	17.82		15.28	15.21	18.06		15.41	15.16	15.09
1/P35244	15.24	15.39	16.58	16.54	16.86	15.22	15.5	15.76	17.24	15.45	15.23	14.73	15.03		15.86		15.55	15.76		16.14	14.99		15.65	16.34		15.2	15.95	15.58	15.81		15.66	15.82	15.74	15.66	15.06	16.26	15.43	15.22	16.03	15.48	15.31	15.37	15.73	15.48	16.17	16.11	15.41	15.61	14.97
1/P35249	16.63														16.6		17.12						16.94						16.87				16.9			16.55			17.02		18.23
1/P35250		18.9	18.07					19.33		18.96	19.16	18.19	17.74	18.68								18.83	18.79					18.02						18.67								18.55	18.57	18.39			18.86		18.61
1/P35251			12.51	13.97
1/P35268	17.9	17.96	18.35	18.69	18.58	17.46	17.3	18.45	18.72	17.96	17.96	17.22	17.71	17.65	18.61	17.45	17.75	18.49	17.66	18.76	17.56	17.93	17.49	18.64	17.01	17.61	18.39	17.91	18.43	18.03	17.88	17.8	18.18	17.81	17.82	18.72	17.93	17.29	18.33	17.8	18.18	17.72	17.44	17.56	18.44	19.2	17.4	18.31	17.97
1/P35269																				15.16																										14.65
1/P35270	16.28	16.37	16.05	15.89	15.93	15.82	16.23	16.44	15.42	16.2	15.7	16.16	16.75	16.48	16.46	16.18	16.44	16.78	16.53	16.95		16.45	16.23	16.27	16.24	16.25	17.22	16.39	16.35	16.32	15.51	16.31	15.6	16.1	16.6	17.19	16.48	15.73	15.7	16.07	15.16	16.42	16.83	16.13	15.78	14.89	16.11	16.52	16.34
1/P35442						16.14	14.71				16.96				15.46			18.7		14.81											15.06	17.5	16.65	15.4				15.83	17.01	15.03	15.19	15.46			16.11
1/P35453							18.34					16.87					16.89													16.18
1/P35475															16.54
1/P35520	18.08	18.17	17.88	17.94	17.6			17	18.44	18.47		18.38	18.11	18.21	17.95	17.9	17.23	18.67	18.05			18.37	18.63	18.67	17.17	18.35	17.42	18.2	17.39	18.15				17.67	18.31		18.12		17.78	17.67	17.29		18.42	18.36	18.17	18.65	18.25
1/P35527	16.76	17.13	17.84	17.88	18.64	18.01	17.92	17.64	18.48	17.05	19.02	17.28	17.1	17.35	17.8	18.38	16.82	19.13	17.17	19.84	20.19	16.87	18.97	19.36	19.25	17	17.77	17.68	16.51	17.3	17.51	17.95	17.59	19.16	16.96	19.45	17.83	18.02	17.66	18.95	17.25	19.12	18.17	18.73	18.66	24.16	18.92	17.63	19
1/P35542			16.35	15.3	16.12		17.81				17.09
1/P35544					15.81							16.17			15.86							15.35							16.14	16.12							16			15.58				16.22
1/P35555	17.95	15.58	15.55	16.16	15.12	21	16.92	18.69	17.4	16.83	19.22	15.6	16.6	16.78	20.09	16.52	18.13	21.66	16.27	18.75	19.88	16.55	16.66	20.83	17.05		16.65	15.91	17.25	16.78	20.47	20.93	21.76	19.67	15.97	17.3	16.53	19.53	21.79	21.67	20.17	19.63	15.5	16.03	20.52	15.48	16	16.74	17.51
1/P35556																	16.84														17.1
1/P35558	14.73	14.99						13.73	14.41	14.39		14.79	15.96	15.38		15.55	15.58		14.74			14.2	15.52	14.52	15.33	14.59	14.79	15.53	14.37	14.77				14.59	15.06		15.33			13.9		13.8	14.93	15.32			15.23	14.5	14.81
1/P35568	16.07	15.94								16.1												15.89								16.05							15.48							15.6
1/P35573	17.1	16.67	15.27	15.69	15.48		14.06	14.93	15.41	17.13		16.69	17.68	17.27		18.2	16.49	15.07	17.53	14.32		17.04	17.25	16.2	16.3	16.65	14.72	17.28	16.22	17.06	14.56		14.57	15.09	17.26		16.83	14.72	14.64	15.16	14.25		17.01	17.2	15.05	15.14	16.9	16.29	17.25
1/P35579	18.61	18.69	18.47	18.72	18.49	20.43	20.63	19.96	19.89	18.6	20	17.43	18.5	18.67	20.13	18.62	19.6	21.1	17.99	20.48	20.29	18.55	18.21	20.85	18.71	17.65	19.42	18.16	18.85	18.72	20.82	21.02	20.68	19.44	18.17	20.43	19.11	20.38	20.5	19.57	20.84	19.48	18.32	18.04	20.46	19.96	18.13	19.31	18.19
1/P35580	15.47	15.18	14.68	15.46		15.66		16.04	15.51	15.71	14.49	14.87	15.29	15.65	15.27	15.44	17.18	16.43	14.84	16.08	17.52	15.66	15.5	16.36	15.31	15.25	14.59	15.64	14.92	15.74	18.17	15.45	15.72	14.73	15.15	14.26	15.65	17.91	15.87	15.71	17.98	15.32	15.47	15.17	15.72	14.79	14.91	15.56	15.08
1/P35606	15.84	16.35	16.2	16.43	16.23	15.47	16.63	16.64	16.24	15.95	15.83	15.61	15.39	16.04	17.51	15.63	15.97	15.92	15.87	17.35	15.94	15.88	15.77	16.69	15.6	15.52	16.57	15.84	16.48	16.11	16.35	16.11	16.41	15.83	15.8	17.07	16.04	16.04	16.52	16.12	16.32	15.21	15.58	15.8	16.73	17.32	15.75	16.63	15.51
1/P35609								14.99								15.32
1/P35611		15.64				15.3		15.52	15.73	14.99	15.72	15.37			15.71	15.42	15.39			15.6	15.6	14.88		15.62	15.21		15.52			15.37	15.79	15.74	15.39		15.5		15.38	15.76	15.62		15.41				14.98			15.58
1/P35613		16.93	18.34	18.47	18.12	16.92	17.23	16.9		16.88	17.81	16.54	17.39	16.89	16.77	16.88		15.93	16.79	16.77		16.81	16.98	17.63	16.65	16.86	16.43	16.85	16.93	16.81	16.59	16.46	16.84	16.38	17.22		17.53	16.81	16.81	16.29	16.71	16.82	17.04	16.68	17.08	19.05	16.98	17.34	17.36
1/P35625																					15.79										15.39										15.63
1/P35637			18.37	18.2	18.63				17.91		15.68						15.91	17.99		17.8	16.31			17.52			17.67					17.32	17.05	16.21		18.49						16.29				18.05
1/P35658										15.45				15.72								15.46																					15.86				15.83
1/P35659			15.47	15.48	15.64	14.51		14.68	15.98						15			15.14		15.62	14.16			15.42			15.22				14.9	14.49	15.09			15.66			15.04	14.66	14.14	16.25			15.1	14.91
1/P35680																																													17.59
1/P35749	16.68	16.47		16.18	15.8	17.57	17.24	16.85	17.35	16.71	17.48	15.68	16.14	16.48	17.12	16.78	17.1	17.96	16.08	17.09	17.81	16.36		17.6	16.13	16.07	16.37	15.97	16.44	16.53	17.95	18.31	17.12	16.99	15.69	16.59	16.53	17.52	17.27	16.77	17.92	17.2	15.91	15.93	17.28	16.67	15.8	16.8
1/P35754	16.34	17.03	15.42	16.58	15.93	15.79	15.41	15.8	16.78	16.71	16.69	16.18	17.12	16.7	15.68	15.68	16.62		16.6	15.91	15.13	16.65	16.29		15.55	16.7	17.24	16.91	17.56	16.69	15.61	14.87	16.22	16.35	16.91	15.56	16.26	16.19	16.28	16.25	15.75	16.34	17.11	16.91	15.69	16.19	16.24	16.85	16.4
1/P35813																14.56							13.86					14.48		14.05																		13.9
1/P35858						14.28	14.93				15.43				14.47																13.78	13.57									13.97
1/P35900	16.48	15.84		16.65	16.26	19.35		16.34	16.66	16.36	19.63		15.93	16.16	17.23	15.97	16.5	18.34			16.08	16.07	15.94				16.3	15.68		16.18	17.82	18.34		16.31			16.13	17.55		16.4	17.73	16.3		16.37		16.33		16.38	16.56
1/P35908	16.58	16.22	15.99	16.26	16.82	16.61	16.17	16.47	16.85	16.75	17.8	16.33	15.55	16.5	15.9	17.52	15.93	17.07	16.24	18.15	17.53	16.78	17.69	17.59	17.55	16.61	17.31	16.68	15.66	16.39	16.48	16.06	16.29	18.08	16.32	18.23	16	15.62	16.19	16.63	16.31	18.1	17.29	16.42	17.42	16.72	17.85	17.05	17.01
1/P35914	16.27	16.4		16	15.35	15.3	15.25	15.96	16	15.59	14.96	15.96	16.47	15.78	15.26	16.22	16.11	15.45	15.97	15.88	15.01	15.31	16.46	15.56	15.78	16.09	15.49	16.19	15.05	16.07	15.88	14.99	15.9	15.98	16.08	15.14	16.44	15.6	15.94	15.42	15.05	15.52	16.24	16.36	15.6	15.62	15.97	16.26	15.76
1/P35968						13.08
1/P35998	16.32	16.4	17.07	17.14	17.51	17.07	18.07	16.34	17.29	16.26	16.77	16.02	16.62	16.76	16.72	16.64	16.64	17.37	16.49	16.64	16.31	16.12	16.19	16.92	16.55	16.25	16.99	16.54	16.61	16.25	16.29	16.59	16.86	16.89	16.55	17.06	16.53	16.25	16.59	16.34	16.54	16.63	16.67	16.62	16.25	17.19	16.13	16.76	16.07
1/P36021
1/P36222							15.54								17.68																														15.8	18.22
1/P36269	14.83	13.93				14.18		14.64	14.99	14.23		13	14.82	14.27	13.62	14.81	16.44	15.72	14.59	14.71	15.33	13.76	14.2	14.35	14.69	14.2		14.95	13.63	14.56	16.62	15.5	13.72	13.74	14.38		15.23	15.58	14.02	13.44	16.76	13.21	14.82	14.28	13.1		13.66	15.2	14.28
1/P36404			15.66		18.08		15.88	17.59			17.28			17.82				15.59				17.8		17.44	17.3					17.66		16.92	15.22			17.52	17.62		15.06						17.86	15.94	17.72
1/P36405					15.79													15.54		15.85																15.2
1/P36507					14.11
1/P36542	18.12	17.91	17.43	17.83	17.43	16.99	17.3	18.12	17.47	17.31	17.25	17.38	18.05	17.9	17.45	18.52	17.81	17.99	17.72	17.61	16.24	17.39	17.84	17.93	17.26	17.74	17.85	17.49	17.05	17.69	17.19	17.28	16.92	17.23	17.7	17.65	17.86	16.09	16.98	17.1	16.85	17.13	18.1	17.67	16.91	18.09	18.12	17.99	18.24
1/P36543	15.43	15.22	15.71	15.69	15.99	15.42	15.88	15.02	15.99	15.49	15.81	14.72	14.64	14.84	15.98	14.83	15.53	15.65	14.91	15.77	15.29	15.18	15.18	15.06	15.01	14.68	15.95	15.15	15.32	15.65	15.93	15.74	16.09	15.35	14.9	15.85	15.57	15.18	16.5	15.42	15.96	15.1	14.95	14.99	16.31	16.43	15.02	15.71	15.09
1/P36551	15.38	15.77	15.55	16.07	16.11	14.87	14.59		14.68	15.53	15.48	14.57	15.18	15.3	14.97	15.19	15.33		15.22	14.51		15.33	15.56	14.35	14.65	15.21	14.62	15.41	14.79	15.32	14.7	14.15		14.76	15.41	14.57	14.73	14.65	14.46	14.73	14.79	14.53	15.12	15.75	15.67	14.93	15.41	16.17	15.65
1/P36578	18.56	18.64	19.26	19.12	19.22	17.96	16.73	19.35	19.46	18.45	17.57	17.68	18.65	18.55	19.18	18.5	18.55	19.41	18.52	19.58	18.47	18.6	18.09	19.81	16.95	18.17	18.85	17.91	19.26	18.51	18.63	18.9	19.03	18.6	18.32	19.41	18.82	17.93	19.08	18.69	18.64	18.74	18.45	18.16	18.76	19.78	18.12	19.06	18.63
1/P36776	15.7	16.14	15.67	17.39	16.14	15.14	15.16	16.76	14.86	15.5	15.63	15.3	15.75	16.23	15.17	16.1	16.06	15.62	16.18	15.58	14.28	15.65	16.15	15.65	15.22	15.9	15.91	15.52	15.37	15.53	14.63	14.65	14.48	15.46	15.72	15.35	16.43	14.84	14.61	16.08	14.84	15.44	15.86	15.82	15.82	15.84	16.37	16.05	15.88
1/P36871	18.67	18.65	17.39	18.04	17.85	15.62	16.36	16.94	18.07	19.26	15.82	19.5	19.02	18.38	17.68	17.91	19.33	17.48	19.14	17.78	15.81	19.29	19.13	16.67	18.82	19.62	17.36	18.94	18.89	19.26	16.72	15.41	16.39	17.14	19.19	17.09	18.41	15.99	16.36	16.85	16.72	17.24	19.37	19.58	17.24	17.13	18.92	18.85	18.9
1/P36873	17.31		16.33	16.95		15.86	16.25		16.37	16.95			17.54			17.42	16.42	15.79	16.68	16.08			17.38		16.72	17.43				16.8					17.44			15.58				17.35	17.53	17.08	16.02	15.97
1/P36915	16.17	16.41	16.58	17.17	16.9		17.79									16.59		16.63						17.1			16.97					16.82				17.45									17.33
1/P36941
1/P36952																															15.48																14.33
1/P36954																								16.6
1/P36955	15.71	16.3	15.72			16.09	15.64		16.27		15.49	16.01			16.32	15.67	15.44			16.4			16.18	16.22			15.67		16.04	16.07		16.29				15.68						15.37		16.26	15.55			16.31
1/P36957	16.23	17.48	16.75	18.12	16.58	17.1	16.73	18.51	16.47	17.39	17.03	17.09	16.53	17.92	16.59	16.86	17.45	16.72	17.6	17.27	16.21	17.3	17.51	16.75	16.93	17.05	17.24	16.53	17.5	17.55	16.3	16.24	16.81	17.22	17.24	17.1	17.82	16.26	16.94	18.49	16.15	17.46	17.12	17.09	17.01	17.14	17.49	17.14	17.5
1/P36959																	15.31								17.16														16.08									15.43
1/P36969						14.49	14.99		15.72			15.35					14.94	15.47		15.04			15.04			15.19	15.2	15.52				15.86		14.89		15.08				14.64			15.05	15.12			15.16		15.04
1/P36980			15.91										16.65									16.4																											16.75
1/P37023
1/P37059	16.37	16.36		14.99	14.25		14.63	16.7	14.47	16.93		16.23	15.1	16.53	18.88	16.03	16.44	15.13	15.94	16.29		16.86	15.96	15.2	16.67	16.49	15.28	15.56	16.04	17.06	14.8			15.59	15.18	16.56	16.31	15.57	14.19	16.28	14.27	15.54	15.81	15.4	15.05	16.39	16.04	16.33	16.26
1/P37108	16.25	15.96	17.02	17.28	17.13	16.01	15.89	17.26	17.96	15.95	15.74	15.16	16.2	16.34	18.14	16.15	16.25	17.82	15.87	17.89	15.73	16.03	15.77	17.05	15.1	15.95	18.27	15.86	16.42	15.92	16.32	17.95	16.91	16.9	15.78	18.46	16.13	15.93	16.69	16.78	16.54	16.82	16.08	15.61	17.39	18.37	15.64	16.41	15.77
1/P37198					14.99	14.79	15.15								15.08			14.31		14.75				15.18			14.82					14.26	14.58			14.71			14.68							15.2
[truncated: 7,265 more rows]
[truncated: 66 more columns]
